# Supplementary material for: Site-selective cation–π interaction as a way of selective recognition of the caesium cation using sumanene-functionalized ferrocenes
Source: Royal Society of Chemistry journal article supplement (doi:10.1039/c9dt03162f), 2019-01-01
Supplement: c9dt03162f1.pdf [file c9dt03162f1.pdf]

## Site-selective cation- $\pi$ -interaction as a way of selective recognition of caesium cation with sumanene-functionalized ferrocenes

Artur Kasprzak<sup>a\*</sup>, Hidehiro Sakurai<sup>b</sup>

<sup>a</sup> Faculty of Chemistry, Warsaw University of Technology, Noakowskiego Str. 3, 00-664 Warsaw, Poland

<sup>b</sup> Division of Applied Chemistry Graduate School of Engineering, Osaka University, 2-1 Yamadaoka, Suita, Osaka 565-0871, Japan

\* e-mail: akasprzak@ch.pw.edu.pl

### Supplementary Information

#### Table of contents

|      |                                                           |    |
|------|-----------------------------------------------------------|----|
| S1.  | Experimental section .....                                | 2  |
| S1.1 | Materials and methods .....                               | 2  |
| S1.2 | Synthesis .....                                           | 3  |
| S1.3 | Florescence spectra titration.....                        | 8  |
| S1.4 | <sup>1</sup> H NMR titration .....                        | 8  |
| S1.5 | Cyclic voltammetry .....                                  | 9  |
| S2.  | NMR spectra.....                                          | 10 |
| S3.  | IR spectra .....                                          | 22 |
| S4.  | UV-Vis spectra .....                                      | 30 |
| S5.  | Fluorescence spectroscopy and titration experiments ..... | 33 |
| S6.  | The Job's plots .....                                     | 42 |
| S7.  | <sup>1</sup> H NMR titration experiments .....            | 45 |
| S8.  | Cyclic voltammograms .....                                | 48 |
| S9.  | Details on calculation of $K_a$ and LOD .....             | 53 |
| S10. | References .....                                          | 55 |

## S1. Experimental section

### S1.1 Materials and methods

Chemical reagents and solvents were commercially purchased and purified according to the standard methods, if necessary. Air- and moisture-sensitive reactions were carried out using commercially available anhydrous solvents under an inert atmosphere of nitrogen. The NMR experiments were carried out using JEOL JNM-ECZS spectrometer operating at 400 MHz ( $^1\text{H}$  NMR at 400 MHz or  $^{13}\text{C}\{^1\text{H}\}$  NMR at 100 MHz). Unless otherwise stated, the spectra were recorded at 23 °C. Standard 5 mm NMR tubes were used.  $^1\text{H}$  and  $^{13}\text{C}$  chemical shifts ( $\delta$ ) were reported in parts per million (ppm) relative to the solvent signals:  $\text{CDCl}_3$ ,  $\delta_{\text{H}}$  (residual  $\text{CHCl}_3$ ) 7.26 ppm,  $\delta_{\text{C}}$  77.23 ppm, or  $(\text{CD}_3)_2\text{CO}$ ,  $\delta_{\text{H}}$  (residual  $(\text{CH}_3)_2\text{CO}$ ) 2.05 ppm. Melting points were determined on Stanford Research Systems MPA 100 and were uncorrected. Infrared (IR) spectra were recorded on a JASCO FT IR-4100 spectrometer with a spectral resolution of  $2\text{ cm}^{-1}$  (80 scans) in the wavelength range of  $2000\text{--}600\text{ cm}^{-1}$ . UV–visible (UV–Vis) absorption spectra were recorded on a JASCO V-670 spectrometer with the spectral resolution of 1 nm. Fluorescence spectra were recorded on a JASCO FP6500 spectrometer with the spectral resolution of 1 nm. Cyclic voltammetry (CV) was measured with a ALS/CH Instruments Electrochemical Analyzer Model 600A. Elemental analyses were performed using CHNS Elementar Vario EL III apparatus. Each elemental composition was reported as an average of two analyses. APCI-MS spectra were measured with ACQUITY ultra performance LC instrument. Gel permeable chromatography (GPC) was conducted on JAIGEL 2H using a JAI Recycling Preparative HPLC LC-908W with  $\text{CHCl}_3$  as eluent. TLC analysis was performed using Merck Silica gel 60 F254 and PTLC was conducted using Wako Wakogel B-5F or with  $\text{Al}_2\text{O}_3$  (neutral) plates.

Sumanene (**1**)<sup>[1]</sup>, formylsumanene (**2**)<sup>[2]</sup>, nitrosumanene (**6**)<sup>[2]</sup>, formylferrocene (**Fc-2**)<sup>[3]</sup>, 1,1'-diformylferrocene (**Fc-4**)<sup>[4]</sup>, *N*-(ferrocenylmethyl)benzene-1,4-diamine (**Fc-3**)<sup>[5]</sup>, were synthesized according to the literature procedures.

## S1.2 Synthesis

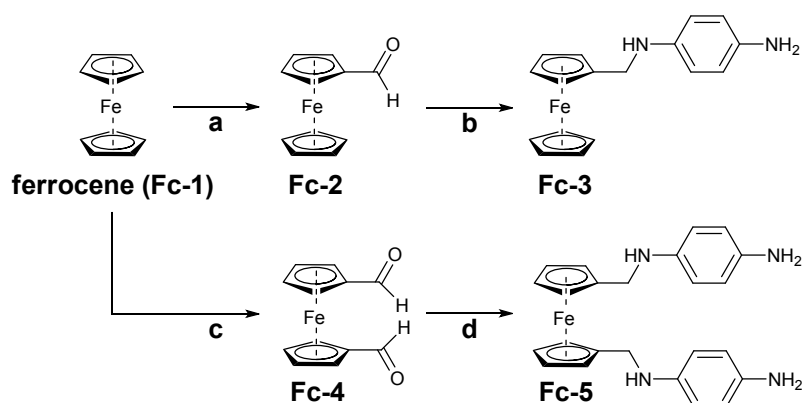

**Scheme S1.** Synthesis of the ferrocene derivatives: **(a)** ferrocene 100 mol%, DMF 200 mol%, POCl<sub>3</sub> 200 mol%, CHCl<sub>3</sub>, 55°C, 24 h, 69% yield; **(b)** formylferrocene 100 mol%, *p*-phenylenediamine 500 mol%, MeOH, reflux, 6 h then NaBH<sub>4</sub> 200 mol%, reflux, 1h, 70% yield; **(c)** ferrocene 100 mol%, TMEDA 200%, <sup>n</sup>BuLi 220 mol%, hex, 27°C, 24 h then DMF 220 mol% in diethyl ether, -78°C, 2 h, 72% yield; **(d)** 1,1'-diformylferrocene 100 mol%, *p*-phenylenediamine 600 mol%, MeOH, reflux, 6 h then NaBH<sub>4</sub> 800 mol%, reflux, 1h, 73% yield.

### N',N'-(1,1'-bis(methyl)ferrocenyl)bis(benzene-1,4-diamine) (Fc-5)

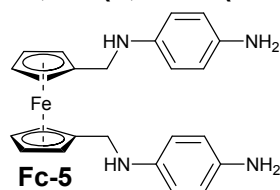

A solution of 1,1'-diformylferrocene (24.2 mg, 0.1 mmol) and *p*-phenylenediamine (64.9 mg, 0.6 mmol) in methanol<sup>[6]</sup> (5 mL) was refluxed for 6 h. Sodium borohydride (30.2 mg, 0.8 mmol) was then added and the mixture was further refluxed for 1 h. The reaction mixture was diluted with CH<sub>2</sub>Cl<sub>2</sub> (20 mL), washed with water (5 mL), brine (3 mL), dried over Na<sub>2</sub>SO<sub>4</sub>, filtered and evaporated in vacuum. The crude product was purified by PTLC (SiO<sub>2</sub>; CH<sub>2</sub>Cl<sub>2</sub>/MeOH, 95:5 v/v) to give compound N',N'-(1,1'-bis(methyl)ferrocenyl)bis(benzene-1,4-diamine) (**Fc-5**; 31.1 mg ; 73% yield) as a dark-orange solid.

Mp: 132 °C (decomp.); <sup>1</sup>H NMR (CDCl<sub>3</sub>, 400 MHz, ppm), δ<sub>H</sub> 6.64-6.62 (m, 4H), 6.58-6.54 (m, 4H), 4.23-4.22 (t, *J* = 1.8 Hz, 2H), 4.14-4.13 (t, *J* = 1.9 Hz, 2H), 3.92 (s, 4H), 3.29 (bs, 6H); <sup>13</sup>C{<sup>1</sup>H} NMR (CDCl<sub>3</sub>, 100 MHz, ppm), δ<sub>C</sub> 114.7 (2C), 138.8 (2C), 138.2 (2C), 116.9 (2C), 114.9 (2C), 87.4 (2C), 68.8 (4C), 68.5 (4C), 68.0 (2C), 44.7 (2C); IR (ATR), ν 1565, 1510, 1485, 1300, 1245, 1105, 815 cm<sup>-1</sup>; Elemental analysis: calculated for C<sub>24</sub>H<sub>26</sub>FeN<sub>4</sub>: C (67.61%), H (6.15%), N (13.14%); found: C (67.50%), H (6.13%), N (13.28%); APCI-MS calcd. for C<sub>24</sub>H<sub>26</sub>FeN<sub>4</sub> [M]<sup>+</sup> = 426.15, found: *m/z* 426.16; R<sub>f</sub> (SiO<sub>2</sub>; CH<sub>2</sub>Cl<sub>2</sub>/MeOH, 95:5 v/v) = 0.55

***N*<sup>1</sup>-(ferrocenylmethyl)-*N*<sup>4</sup>-(sumanenylmethyl)benzene-1,4-diamine (**3**)**

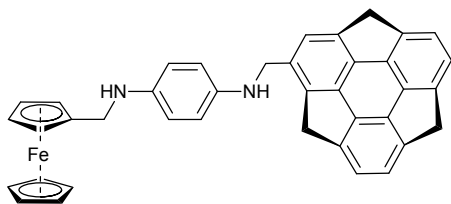

**3**

A solution of *N*-(ferrocenylmethyl)benzene-1,4-diamine (**Fc-3**; 2.5 mg, 0.0082 mmol) in MeOH<sup>[6]</sup> (0.8 mL) was added to a stirred solution of formylsumanene (**2**; 2.4 mg, 0.0082 mmol) in dry THF (1.0 mL). Formic acid (85%; 10  $\mu$ L) was added and the mixture was stirred at 27 °C for 24 h. Then, sodium borohydride (1.2 mg, 0.0248 mmol) was added and the mixture was further stirred at 27 °C for 3 h. CH<sub>2</sub>Cl<sub>2</sub> (15 mL) was added and the organic layer was washed with saturated NaHCO<sub>3</sub> (2 mL), water (2 mL), brine (2 mL), dried with Na<sub>2</sub>SO<sub>4</sub>, filtered, and the solvent was removed in vacuum. The resultant residue was purified by column chromatography (Al<sub>2</sub>O<sub>3</sub>; CH<sub>2</sub>Cl<sub>2</sub>/MeOH = 99.5:0.5 v/v) to give *N*<sup>1</sup>-(ferrocenylmethyl)-*N*<sup>4</sup>-(sumanenylmethyl)benzene-1,4-diamine (**3**; 3.6 mg, 75% yield) as the light-orange solid.

Mp: 195 °C (decomp.); <sup>1</sup>H NMR (CDCl<sub>3</sub>, 400 MHz, ppm),  $\delta$ <sub>H</sub> 7.16 (s, 1H), 7.11–7.09 (m, 4H), 6.63–6.62 (m, 4H), 4.35–4.22 (m, 5H), 4.24–4.23 (t, *J* = 1.9 Hz, 2H), 4.17 (s, 5H), 4.13–4.12 (t, *J* = 1.9 Hz, 2H), 3.91 (s, 2H), 3.52 (d, *J* = 19.9 Hz, 1H), 3.44 (d, *J* = 15.0 Hz, 1H), 3.39 (d, *J* = 15.1 Hz, 1H); <sup>1</sup>H NMR ((CD<sub>3</sub>)<sub>2</sub>CO, 400 MHz, ppm),  $\delta$ <sub>H</sub> 7.25 (s, 1H), 7.16–7.14 (m, 4H), 6.60–6.54 (m, 4H), 4.72–4.64 (m, 4H), 4.40–4.27 (m, 4H), 4.23–4.22 (t, *J* = 1.9 Hz, 2H), 4.16 (s, 5H), 4.12–4.10 (t, *J* = 5.9 Hz, 1H), 4.07–4.05 (t, *J* = 1.9 Hz, 2H), 3.91 (d, *J* = 5.9 Hz, 2H), 3.64 (d, *J* = 20.0 Hz, 1H), 3.48 (d, *J* = 15.1 Hz, 1H), 3.44 (d, *J* = 15.0 Hz, 1H); <sup>13</sup>C{<sup>1</sup>H} NMR (CDCl<sub>3</sub>, 100 MHz, ppm),  $\delta$ <sub>C</sub> 150.3, 149.2, 149.2, 149.1, 149.0, 148.9, 148.8 (2C), 148.2, 147.1, 141.3, 141.2, 135.9, 123.6, 123.5 (2C), 123.4 (2C), 115.1 (2C), 115.0 (2C), 87.2, 87.2, 68.7 (5C), 68.3 (2C), 68.0 (2C), 49.0, 45.0, 42.0 (2C), 41.0; IR (ATR),  $\nu$  1560, 1510, 1460, 1300, 1225, 1100, 1000, 800, 750 cm<sup>-1</sup>; UV-Vis,  $\lambda$ <sub>max</sub> (CHCl<sub>3</sub>:MeOH = 1:1 v/v) 250, 280, 360, 395 nm; Elemental analysis: calculated for C<sub>39</sub>H<sub>30</sub>FeN<sub>2</sub>: C (80.41%), H (5.19%), N (4.81%); found: C (80.07%), H (5.28%), N (4.65%); APCI-MS: calcd. for C<sub>39</sub>H<sub>30</sub>FeN<sub>2</sub>[M]<sup>+</sup> = 582.81, found: *m/z* 582.83; R<sub>f</sub> (Al<sub>2</sub>O<sub>3</sub>; CH<sub>2</sub>Cl<sub>2</sub>/MeOH, 99.5:0.5 v/v) = 0.40

**(*E*)-*N*<sup>1</sup>-(ferrocenylmethyl)-*N*<sup>4</sup>-(sumenylmethyl)benzene-1,4-diamine (**4**)**

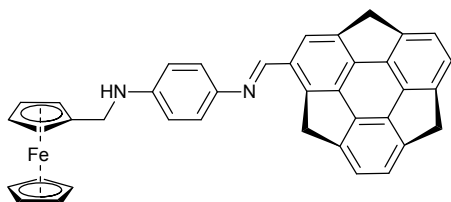

**4**

A solution of *N*-(ferrocenylmethyl)benzene-1,4-diamine (**Fc-3**; 2.5 mg, 0.0082 mmol) in MeOH<sup>[6]</sup> (0.8 mL) was added to a stirred solution of formylsumenene (**2**; 2.4 mg,

0.0082 mmol) in dry THF (1.0 mL). Formic acid (85%; 10  $\mu$ L) was added and the mixture was stirred at 27 °C for 24 h. CH<sub>2</sub>Cl<sub>2</sub> (15 mL) was added and the organic layer was washed with saturated NaHCO<sub>3</sub> (2 mL), water (2 mL), brine (2 mL), dried with Na<sub>2</sub>SO<sub>4</sub>, filtered, and the solvent was removed in vacuum. The resultant residue was purified by using a recycling GPC (chloroform as eluting solvent) to give (*E*)-*N*<sup>1</sup>-(ferrocenylmethyl)-*N*<sup>4</sup>-(sumenenyilmethyl)benzene-1,4-diamine (**4**; 4.5 mg, 94% yield) as the dark yellow solid.

Mp: 178°C (decomp.); <sup>1</sup>H NMR (CDCl<sub>3</sub>, 400 MHz, ppm), 8.60 (s, 1H), 7.61 (s, 1H), 7.25-7.23 (m, 2H), 7.17-7.11 (m, 4H), 6.71-6.69 (m, 2H), 4.98 (d, *J* = 20.6 Hz, 1H), 4.75 (d, *J* = 19.6 Hz, 1H), 4.72 (d, *J* = 19.6 Hz, 1H), 4.27-4.26 (t, *J* = 1.9 Hz, 2H), 4.20 (s, 5H), 4.17-4.16 (t, *J* = 1.9 Hz, 2H), 4.00-3.98 (bm, 3H), 3.66 (d, *J* = 20.6 Hz, 1H), 3.50 (d, *J* = 19.6 Hz, 1H), 3.45 (d, *J* = 19.6 Hz, 1H); <sup>13</sup>C{<sup>1</sup>H} NMR (CDCl<sub>3</sub>, 100 MHz, ppm),  $\delta_c$  156.1, 150.1, 149.5, 149.4 (2C), 149.1, 149.0, 148.9, 148.8, 148.6, 148.2, 147.5, 147.3, 147.1, 142.6, 133.7, 124.9, 124.1, 124.0, 123.6 (2C), 122.7 (2C), 113.4 (2C), 86.5, 68.7 (5C), 68.4 (2C), 68.2 (2C), 43.8, 43.0, 42.0, 41.8; IR (ATR),  $\nu$  1635, 1555, 1510, 1455, 1300, 1250, 1100, 995, 805, 755 cm<sup>-1</sup>; UV-Vis,  $\lambda_{max}$  (CHCl<sub>3</sub>:MeOH = 1:1 v/v) 255, 295, 360, 390 nm; Elemental analysis: calculated for C<sub>39</sub>H<sub>28</sub>FeN<sub>2</sub>: C (80.69%), H (4.86%), N (4.83%); found: C (80.15%), H (4.59%), N (4.60%); APCI-MS: calcd. for C<sub>39</sub>H<sub>28</sub>FeN<sub>2</sub> [M]<sup>+</sup> = 580.49, found: *m/z* 582.48. R<sub>f</sub> (SiO<sub>2</sub>; CH<sub>2</sub>Cl<sub>2</sub>) = 0.56

**(*N*<sup>4</sup>*E*,*N*<sup>4</sup>*E*)-*N*<sup>1</sup>,*N*<sup>1'</sup>-(1,1'-bis(methyl)ferrocenyl)bis(*N*<sup>4</sup>-(sumenenyilmethyl)benzene-1,4-diamine) (**5**)**

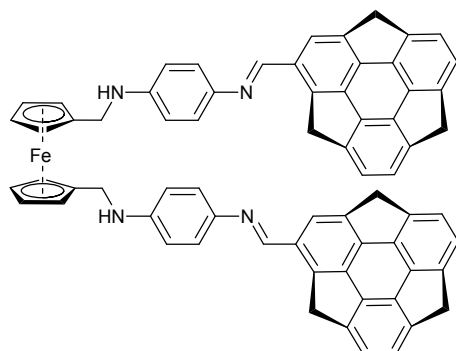

**5**

A solution of *N*<sup>1</sup>,*N*<sup>1'</sup>-(1,1'-bis(methyl)ferrocenyl)bis(benzene-1,4-diamine) (**Fc-5**; 3.1 mg, 0.0072 mmol) in MeOH<sup>[6]</sup> (1.0 mL) was added to a stirred solution of formylsumanene (**2**; 4.2 mg, 0.0144 mmol) in dry THF (2.0 mL). Formic acid (85%; 20  $\mu$ L) was added and the mixture was stirred at 27 °C for 24 h. CH<sub>2</sub>Cl<sub>2</sub> (20 mL) was added and the organic layer was washed with saturated NaHCO<sub>3</sub> (3 mL), water (2 mL), brine (3 mL), dried with Na<sub>2</sub>SO<sub>4</sub>, filtered, and the solvent was removed in vacuum. The resultant residue was purified by using a recycling GPC (chloroform as eluting solvent) to give (*N*<sup>4</sup>*E*, *N*<sup>4</sup>*E*)-*N*<sup>1</sup>,*N*<sup>1'</sup>-(1,1'-bis(methyl)ferrocenyl)bis(*N*<sup>4</sup>-(sumenenyilmethyl)benzene-1,4-diamine) (**5**; 5.0 mg, 72% yield) as the yellow solid.<sup>[7]</sup>

Mp: 171°C (decomp.); <sup>1</sup>H NMR (CDCl<sub>3</sub>, 400 MHz, ppm),  $\delta$  8.57 (s, 1H), 8.55 (s, 1H), 7.59 (s, 1H), 7.56 (s, 1H), 7.23-7.20 (m, 4H), 7.11-7.06 (m, 8H), 6.67-6.63 (m, 4H),

4.94-4.84 (m, 2H), 4.72-4.59 (m, 4H), 4.29-4.28 (t,  $J = 1.8$  Hz, 2H), 4.21-4.20 (t,  $J = 1.8$  Hz, 2H), 4.02-4.00 (bm, 6H), 3.84-3.69 (m, 2H), 3.45-3.29 (m, 4H);  $^{13}\text{C}\{^1\text{H}\}$  NMR ( $\text{CDCl}_3$ , 100 MHz, ppm),  $\delta_{\text{C}}$  156.3, 156.1, 149.5 (2C), 149.4 (2C), 149.3 (4C), 149.2 (2C), 149.1 (2C), 149.0 (2C), 148.9 (2C), 148.2 (2C), 148.0 (2C), 147.8 (2C), 147.5 (4C), 147.4 (2C), 147.3 (2C), 135.5 (2C), 124.9 (2C), 124.4 (2C), 124.1 (2C), 123.9 (2C), 123.5 (2C), 122.8 (4C), 113.50 (6C), 87.0 (2C), 68.8 (2C), 68.7 (2C), 43.0 (2C), 42.8 (2C), 42.0 (2C), 41.7 (2C); IR (ATR),  $\nu$  1650, 1605, 1510, 1460, 1395, 1255, 1085, 1020, 795  $\text{cm}^{-1}$ ; UV-Vis,  $\lambda_{\text{max}}$  ( $\text{CHCl}_3$ :MeOH = 1:1 v/v) 255, 295, 395 nm; Elemental analysis: calculated for  $\text{C}_{68}\text{H}_{46}\text{FeN}_4$ : C (83.77%), H (4.76%), N (5.75%); found: C (84.02%), H (4.85%), N (5.60%); APCI-MS: calcd. for  $\text{C}_{68}\text{H}_{46}\text{FeN}_4[\text{M}]^+ = 974.97$ , found:  $m/z$  974.96.  $R_f$  ( $\text{SiO}_2$ ;  $\text{CH}_2\text{Cl}_2$ ) = 0.75

### Aminosumanene (7)

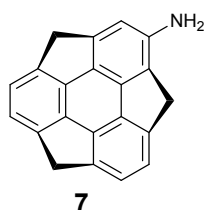

A mixture containing nitrosumanene (**6**; 4.0 mg, 0.0121 mmol) and Pd/C (10% Pd; 8.0 mg, 200 w/w%) in the solvent ( $\text{EtOH}/\text{AcOEt} = 1:1$  v/v, 4.0 mL)<sup>[8]</sup> was stirred at 27 °C for 3 h. The mixture was filtered through celite and washed with  $\text{CH}_2\text{Cl}_2$  (15 mL). The volatiles were distilled off in vacuum to give aminosumanene (**7**; 3.4 mg, 99% yield) as a yellow-white solid.

Mp: 118 °C (decomp.);  $^1\text{H}$  NMR ( $\text{CDCl}_3$ , 400 MHz, ppm),  $\delta$  7.12-7.10 (m, 3H), 7.03-6.96 (m, 2H), 6.42 (bs, 2H), 4.70-4.49 (m, 3H), 3.41-3.28 (m, 3H);  $^{13}\text{C}\{^1\text{H}\}$  NMR ( $\text{CDCl}_3$ , 100 MHz, ppm),  $\delta_{\text{C}}$  153.0, 150.7, 150.1, 149.3, 149.1, 149.0, 148.4, 147.9, 147.4, 143.2, 140.8, 129.4, 123.6, 123.5, 123.3, 121.7, 121.7, 111.7, 41.8, 41.6, 39.7; IR (ATR),  $\nu$  1585, 1535, 1320, 1250, 985, 815, 750  $\text{cm}^{-1}$ ; Elemental analysis: calculated for  $\text{C}_{21}\text{H}_{13}\text{N}$ : C (90.29%), H (4.70%), N (5.01%); found: C (90.20%), H (4.59%), N (5.21%); APCI-MS: calcd. for  $\text{C}_{21}\text{H}_{13}\text{N}[\text{M}]^+ = 279.33$ , found:  $m/z$  279.34.  $R_f$  ( $\text{SiO}_2$ ;  $\text{CH}_2\text{Cl}_2$ ) = 0.67

### N-(ferrocenylmethyl)sumanene (8)

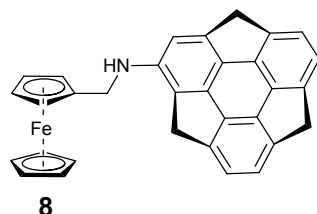

A solution of formylferrocene (3.0 mg, 0.0140 mmol), aminosumanene (3.9 mg, 0.0140 mmol) and formic acid (85%; 20  $\mu\text{L}$ ) in THF/methanol solvent system (1:2 v/v)<sup>[8]</sup> (2.5 mL) was refluxed for 6 hours at nitrogen atmosphere. Sodium borohydride (1.7 mg, 0.0420 mmol, 3 eq) was then added and the mixture was further refluxed for 1 h. The

reaction mixture was diluted with CH<sub>2</sub>Cl<sub>2</sub> (15 mL), washed saturated NaHCO<sub>3</sub> (2 mL), water (2 mL), brine (2 mL), dried over Na<sub>2</sub>SO<sub>4</sub>, filtered and evaporated in vacuum. The resultant residue was purified by using a recycling GPC (chloroform as eluting solvent) to give *N*-(ferrocenylmethyl)sumanene (**8**; 4.6 mg, 69%) as the light-orange solid.<sup>[9]</sup>

Mp: 221 °C (decomp.); <sup>1</sup>H NMR (CDCl<sub>3</sub>, 400 MHz, ppm), δ<sub>H</sub> 7.10-7.09 (m, 3H), 7.04-6.94 (m, 2H), 6.45 (bs, 1H), 4.68 (d, *J* = 19.2 Hz, 1H), 4.63 (d, *J* = 19.1 Hz, 1H), 4.59 (d, *J* = 19.4 Hz, 1H), 4.27-4.26 (t, *J* = 1.8 Hz, 2H), 4.21 (s, 5H), 4.18-4.17 (t, *J* = 1.8 Hz, 2H), 4.01 (d, *J* = 7.8 Hz, 2H), 3.41 (d, *J* = 19.2 Hz, 1H), 3.36 (d, *J* = 19.1 Hz, 1H), 3.32 (d, *J* = 19.4 Hz, 1H); <sup>13</sup>C{<sup>1</sup>H} NMR (CDCl<sub>3</sub>, 100 MHz, ppm), δ<sub>C</sub> 153.1, 149.8, 149.5, 149.2, 148.4, 148.3, 148.0, 147.9, 147.5, 147.4 (2C), 147.1, 146.9, 146.6, 136.0, 134.6, 123.4, 108.0, 98.4, 68.73 (5C), 68.33, (2C), 68.2 (2C), 51.2, 42.7, 41.7, 40.6; IR (ATR), ν 1545, 1515, 1465, 1290, 1245, 1130, 1105, 995, 810 cm<sup>-1</sup>; UV-Vis, λ<sub>max</sub> (CHCl<sub>3</sub>:MeOH = 1:1 v/v) 250, 280, 370 nm; Elemental analysis: calculated for C<sub>32</sub>H<sub>23</sub>FeN: C (80.51%), H (4.86%), N (2.93%); found: C (80.71%), H (4.72%), N (3.04%); APCI-MS: calcd. for C<sub>32</sub>H<sub>23</sub>FeN [M]<sup>+</sup> = 477.38, found: *m/z* 477.36. R<sub>f</sub> (SiO<sub>2</sub>; CH<sub>2</sub>Cl<sub>2</sub>/hexane, 95:5 v/v) = 0.82

### (*E*)-*N*-(ferrocenylmethyl)sumanene (**9**)

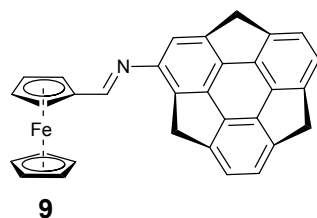

A solution of formylferrocene (3.0 mg, 0.0140 mmol), aminosumanene (3.9 mg, 0.0140 mmol) and formic acid (85%; 20 μL) in THF/methanol solvent system (1:2 v/v)<sup>[8]</sup> (2.5 mL) was refluxed for 6 h. The reaction mixture was diluted with CH<sub>2</sub>Cl<sub>2</sub> (15 mL), washed saturated NaHCO<sub>3</sub> (2 mL), water (2 mL), brine (2 mL), dried over Na<sub>2</sub>SO<sub>4</sub>, filtered and evaporated in vacuum. The resultant residue was purified by using a recycling GPC (chloroform as eluting solvent) to give (*E*)-*N*-(ferrocenylmethyl)sumanene (**9**; 4.1 mg, 61%) as the orange solid.

Mp: 202 °C (decomp.); <sup>1</sup>H NMR (CDCl<sub>3</sub>, 400 MHz, ppm), δ<sub>H</sub> 8.56 (s, 1H), 7.13-7.09 (m, 4H), 6.96 (s, 1H), 4.80 (d, *J* = 19.9 Hz, 1H), 4.82-4.81 (t, *J* = 1.9 Hz, 2H), 4.72 (d, *J* = 19.6 Hz, 2H), 4.50 (t, *J* = 1.9 Hz, 2H), 4.25 (s, 5H), 3.56 (d, *J* = 19.9 Hz, 1H), 3.47 (d, *J* = 19.6 Hz, 1H), 3.42 (d, *J* = 19.6 Hz, 1H); <sup>13</sup>C{<sup>1</sup>H} NMR (CDCl<sub>3</sub>, 100 MHz, ppm), δ<sub>C</sub> 162.1, 151.7, 149.5, 149.3, 149.2, 149.1, 149.0, 148.9, 148.7, 148.6, 148.5, 148.4 (2C), 123.8, 123.6, 123.5 (2C), 123.1, 119.3, 71.5, 69.6 (5C), 69.3 (2C), 69.2 (2C), 41.9, 41.8, 41.5; IR (ATR), ν 1630, 1520, 1465, 1395, 1295, 1255, 1120, 1005, 815 cm<sup>-1</sup>; UV-Vis, λ<sub>max</sub> (CHCl<sub>3</sub>:MeOH = 1:1 v/v) 240, 280, 375 nm; Elemental analysis: calculated for C<sub>32</sub>H<sub>21</sub>FeN: C (80.85%), H (4.45%), N (2.95%); found: C (80.99%), H (4.28%), N (3.09%); APCI-MS: calcd. for C<sub>32</sub>H<sub>21</sub>FeN [M]<sup>+</sup> = 475.36, found: *m/z* 475.35. R<sub>f</sub> (SiO<sub>2</sub>; CH<sub>2</sub>Cl<sub>2</sub>/hexane, 90:10 v/v) = 0.85

### ***N*<sup>1</sup>-(ferrocenylmethyl)-*N*<sup>4</sup>-(naphthalen-2-ylmethyl)benzene-1,4-diamine (**10**)**

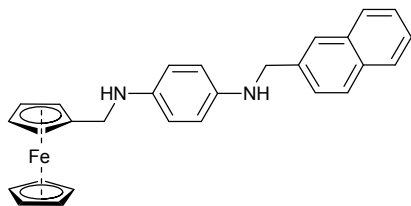

A solution of *N*-(ferrocenylmethyl)benzene-1,4-diamine (**Fc-3**; 5.6 mg, 0.0082 mmol), 2-naphthaldehyde (2.9 mg, 0.0183 mmol) and formic acid (85%; 30  $\mu$ L) in MeOH<sup>[6]</sup> (2.0 mL) was stirred at 27 °C for 24 h. Then, sodium borohydride (1.2 mg, 0.0248 mmol) was added and the mixture was further stirred at 27 °C for 3 h. CH<sub>2</sub>Cl<sub>2</sub> (20 mL) was added and the organic layer was washed with saturated NaHCO<sub>3</sub> (2 mL), water (2 mL), brine (2 mL), dried with Na<sub>2</sub>SO<sub>4</sub>, filtered, and the solvent was removed in vacuum. The resultant residue was purified by PTLC (SiO<sub>2</sub>; CH<sub>2</sub>Cl<sub>2</sub>) to give *N*<sup>1</sup>-(ferrocenylmethyl)-*N*<sup>4</sup>-(naphthalen-2-ylmethyl)benzene-1,4-diamine (**10**; 5.5 mg, 67% yield) as the light-orange solid.

Mp: 110 °C (decomp.); <sup>1</sup>H NMR (CDCl<sub>3</sub>, 400 MHz, ppm),  $\delta_{\text{H}}$  7.86-7.80 (m, 4H), 7.52-7.45 (m, 3H), 6.66-6.60 (m, 4H), 4.87 (bs, 1H), 4.44-4.455 (bm, 2H), 4.24-4.23 (t,  $J$  = 1.9 Hz, 2H), 4.17 (s, 5H), 4.13-4.12 (t,  $J$  = 1.9 Hz, 2H), 3.90-3.89 (bm, 2H), 3.64 (bs, 1H); <sup>13</sup>C{<sup>1</sup>H} NMR (CDCl<sub>3</sub>, 100 MHz, ppm),  $\delta_{\text{C}}$  141.2, 141.0, 137.7, 132.9, 128.4, 128.1, 128.0, 127.9, 126.3 (2C), 126.2 (2C), 125.8, 125.4, 115.0 (2C), 87.13, 68.6 (5C), 68.3 (2C), 67.9 (2C), 49.9, 44.9; IR (ATR),  $\nu$  1555, 1515, 1460, 1295, 1250, 1130, 1095, 1005, 810, 745 cm<sup>-1</sup>; UV-Vis,  $\lambda_{\text{max}}$  (CHCl<sub>3</sub>:MeOH = 1:1 v/v) 260, 265, 270, 380 nm; Elemental analysis: calculated for C<sub>28</sub>H<sub>26</sub>FeN<sub>2</sub>: C (75.34%), H (5.87%), N (6.28%); found: C (75.83%), H (5.26%), N (6.36%); APCI-MS: calcd. for C<sub>28</sub>H<sub>26</sub>FeN<sub>2</sub> [M]<sup>+</sup> = 446.36, found:  $m/z$  446.35; R<sub>f</sub> (SiO<sub>2</sub>; CH<sub>2</sub>Cl<sub>2</sub>) = 0.31.

#### **S1.3 Florescence spectra titration**

The 0.5 mM stock solution of the sumanene-ferrocene conjugate and 2 mM stock solution of Cs<sup>+</sup> (in the form of CsCl) in the solvent system (CHCl<sub>3</sub>:MeOH = 1/1 v/v) were prepared. The concentration of sumanene-ferrocene conjugate was kept constant (0.1 mM), whilst the samples varied in the molar equivalent of Cs<sup>+</sup> added (eq = 0, 0.5, 1, 2, 4, 6 or 12).

#### **S1.4 <sup>1</sup>H NMR titration**

The 3.0 mM stock solution of the sumanene-ferrocene conjugate and 9 mM stock solution of Cs<sup>+</sup> (in the form of CsCl) in the solvent system (CDCl<sub>3</sub>:CD<sub>3</sub>OD = 1/1 v/v) were prepared. The concentration of sumanene-ferrocene conjugate was kept constant (1.5 mM), whilst the samples varied in the molar equivalent of Cs<sup>+</sup> added (eq = 0, 0.5, 1, 2, 3).



### S1.5 Cyclic voltammetry

Measurements were conducted in  $\text{CH}_2\text{Cl}_2$  with tetrabutylammonium perchlorate (TBAP; 0.1 M) as a supporting electrolyte, with a sumanene-ferrocene conjugate concentration of 0.5 mM and a scan rate of 0.05 V/s. The voltammograms were referenced against the ferrocene/ferrocenium couple ( $\text{Fc}/\text{Fc}^+$ ). The glassy carbon electrode (GCE) played a role of the working electrode, Ag/AgCl electrode was used as the reference electrode and a platinum wire was used as the counter electrode. The working electrode was polished with  $\text{Al}_2\text{O}_3$  slurry on a wet pad before the measurement. After the polishing step, the electrode was rinsed with the pure solvent.

For the  $\text{Cs}^+$  recognition tests, cyclic voltammograms were measured in the solvent system ( $\text{CHCl}_3:\text{MeOH} = 1/1 \text{ v/v}$ ) with TBAP as a supporting electrolyte (0.1 M). Two tests were run: (1) with the solution of pristine sumanene-ferrocene conjugate (0.5 mM), (2) with the solution of sumanene-ferrocene conjugate (0.5 mM) containing 12 molar equivalents of  $\text{Cs}^+$  (in the form of its corresponding chloride).

**Fc-5**

<sup>1</sup>H NMR (400 MHz, CDCl<sub>3</sub>) peaks (ppm): 7.735, 7.733, 7.731, 7.729, 7.727, 7.725, 7.723, 7.721, 7.719, 7.717, 7.715, 7.713, 7.711, 7.709, 7.707, 7.705, 7.703, 7.701, 7.699, 7.697, 7.695, 7.693, 7.691, 7.689, 7.687, 7.685, 7.683, 7.681, 7.679, 7.677, 7.675, 7.673, 7.671, 7.669, 7.667, 7.665, 7.663, 7.661, 7.659, 7.657, 7.655, 7.653, 7.651, 7.649, 7.647, 7.645, 7.643, 7.641, 7.639, 7.637, 7.635, 7.633, 7.631, 7.629, 7.627, 7.625, 7.623, 7.621, 7.619, 7.617, 7.615, 7.613, 7.611, 7.609, 7.607, 7.605, 7.603, 7.601, 7.599, 7.597, 7.595, 7.593, 7.591, 7.589, 7.587, 7.585, 7.583, 7.581, 7.579, 7.577, 7.575, 7.573, 7.571, 7.569, 7.567, 7.565, 7.563, 7.561, 7.559, 7.557, 7.555, 7.553, 7.551, 7.549, 7.547, 7.545, 7.543, 7.541, 7.539, 7.537, 7.535, 7.533, 7.531, 7.529, 7.527, 7.525, 7.523, 7.521, 7.519, 7.517, 7.515, 7.513, 7.511, 7.509, 7.507, 7.505, 7.503, 7.501, 7.499, 7.497, 7.495, 7.493, 7.491, 7.489, 7.487, 7.485, 7.483, 7.481, 7.479, 7.477, 7.475, 7.473, 7.471, 7.469, 7.467, 7.465, 7.463, 7.461, 7.459, 7.457, 7.455, 7.453, 7.451, 7.449, 7.447, 7.445, 7.443, 7.441, 7.439, 7.437, 7.435, 7.433, 7.431, 7.429, 7.427, 7.425, 7.423, 7.421, 7.419, 7.417, 7.415, 7.413, 7.411, 7.409, 7.407, 7.405, 7.403, 7.401, 7.399, 7.397, 7.395, 7.393, 7.391, 7.389, 7.387, 7.385, 7.383, 7.381, 7.379, 7.377, 7.375, 7.373, 7.371, 7.369, 7.367, 7.365, 7.363, 7.361, 7.359, 7.357, 7.355, 7.353, 7.351, 7.349, 7.347, 7.345, 7.343, 7.341, 7.339, 7.337, 7.335, 7.333, 7.331, 7.329, 7.327, 7.325, 7.323, 7.321, 7.319, 7.317, 7.315, 7.313, 7.311, 7.309, 7.307, 7.305, 7.303, 7.301, 7.299, 7.297, 7.295, 7.293, 7.291, 7.289, 7.287, 7.285, 7.283, 7.281, 7.279, 7.277, 7.275, 7.273, 7.271, 7.269, 7.267, 7.265, 7.263, 7.261, 7.259, 7.257, 7.255, 7.253, 7.251, 7.249, 7.247, 7.245, 7.243, 7.241, 7.239, 7.237, 7.235, 7.233, 7.231, 7.229, 7.227, 7.225, 7.223, 7.221, 7.219, 7.217, 7.215, 7.213, 7.211, 7.209, 7.207, 7.205, 7.203, 7.201, 7.199, 7.197, 7.195, 7.193, 7.191, 7.189, 7.187, 7.185, 7.183, 7.181, 7.179, 7.177, 7.175, 7.173, 7.171, 7.169, 7.167, 7.165, 7.163, 7.161, 7.159, 7.157, 7.155, 7.153, 7.151, 7.149, 7.147, 7.145, 7.143, 7.141, 7.139, 7.137, 7.135, 7.133, 7.131, 7.129, 7.127, 7.125, 7.123, 7.121, 7.119, 7.117, 7.115, 7.113, 7.111, 7.109, 7.107, 7.105, 7.103, 7.101, 7.099, 7.097, 7.095, 7.093, 7.091, 7.089, 7.087, 7.085, 7.083, 7.081, 7.079, 7.077, 7.075, 7.073, 7.071, 7.069, 7.067, 7.065, 7.063, 7.061, 7.059, 7.057, 7.055, 7.053, 7.051, 7.049, 7.047, 7.045, 7.043, 7.041, 7.039, 7.037, 7.035, 7.033, 7.031, 7.029, 7.027, 7.025, 7.023, 7.021, 7.019, 7.017, 7.015, 7.013, 7.011, 7.009, 7.007, 7.005, 7.003, 7.001, 6.999, 6.997, 6.995, 6.993, 6.991, 6.989, 6.987, 6.985, 6.983, 6.981, 6.979, 6.977, 6.975, 6.973, 6.971, 6.969, 6.967, 6.965, 6.963, 6.961, 6.959, 6.957, 6.955, 6.953, 6.951, 6.949, 6.947, 6.945, 6.943, 6.941, 6.939, 6.937, 6.935, 6.933, 6.931, 6.929, 6.927, 6.925, 6.923, 6.921, 6.919, 6.917, 6.915, 6.913, 6.911, 6.909, 6.907, 6.905, 6.903, 6.901, 6.899, 6.897, 6.895, 6.893, 6.891, 6.889, 6.887, 6.885, 6.883, 6.881, 6.879, 6.877, 6.875, 6.873, 6.871, 6.869, 6.867, 6.865, 6.863, 6.861, 6.859, 6.857, 6.855, 6.853, 6.851, 6.849, 6.847, 6.845, 6.843, 6.841, 6.839, 6.837, 6.835, 6.833, 6.831, 6.829, 6.827, 6.825, 6.823, 6.821, 6.819, 6.817, 6.815, 6.813, 6.811, 6.809, 6.807, 6.805, 6.803, 6.801, 6.799, 6.797, 6.795, 6.793, 6.791, 6.789, 6.787, 6.785, 6.783, 6.781, 6.779, 6.777, 6.775, 6.773, 6.771, 6.769, 6.767, 6.765, 6.763, 6.761, 6.759, 6.757, 6.755, 6.753, 6.751, 6.749, 6.747, 6.745, 6.743, 6.741, 6.739, 6.737, 6.735, 6.733, 6.731, 6.729, 6.727, 6.725, 6.723, 6.721, 6.719, 6.717, 6.715, 6.713, 6.711, 6.709, 6.707, 6.705, 6.703, 6.701, 6.699, 6.697, 6.695, 6.693, 6.691, 6.689, 6.687, 6.685, 6.683, 6.681, 6.679, 6.677, 6.675, 6.673, 6.671, 6.669, 6.667, 6.665, 6.663, 6.661, 6.659, 6.657, 6.655, 6.653, 6.651, 6.649, 6.647, 6.645, 6.643, 6.641, 6.639, 6.637, 6.635, 6.633, 6.631, 6.629,

10

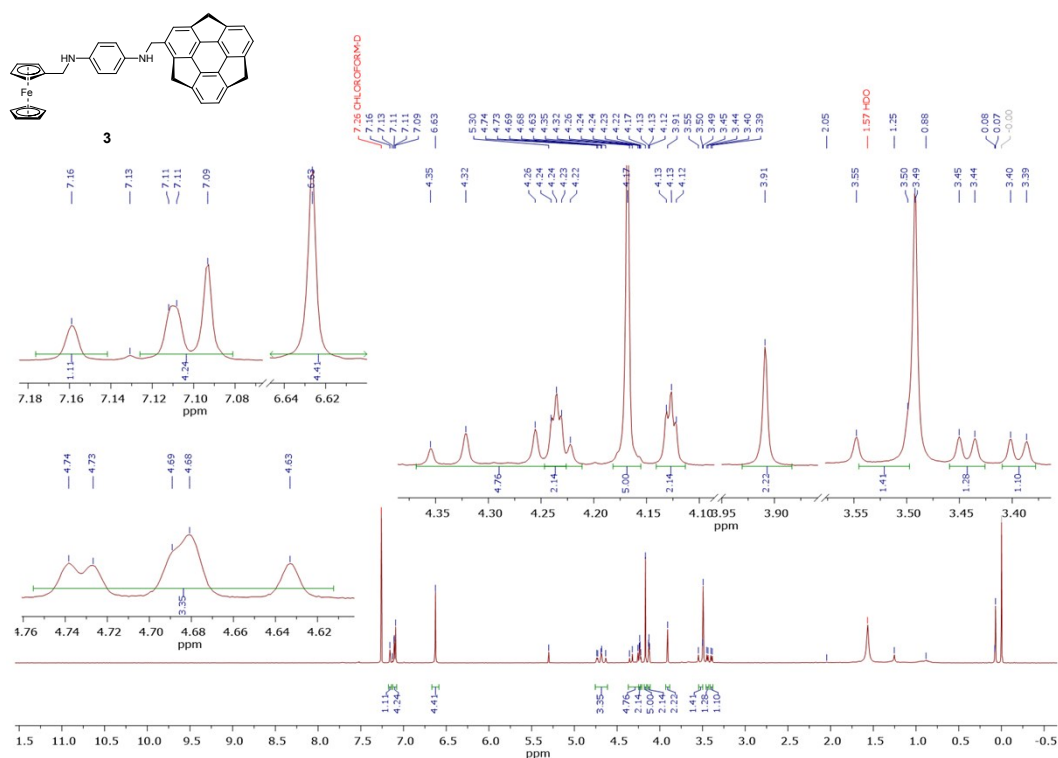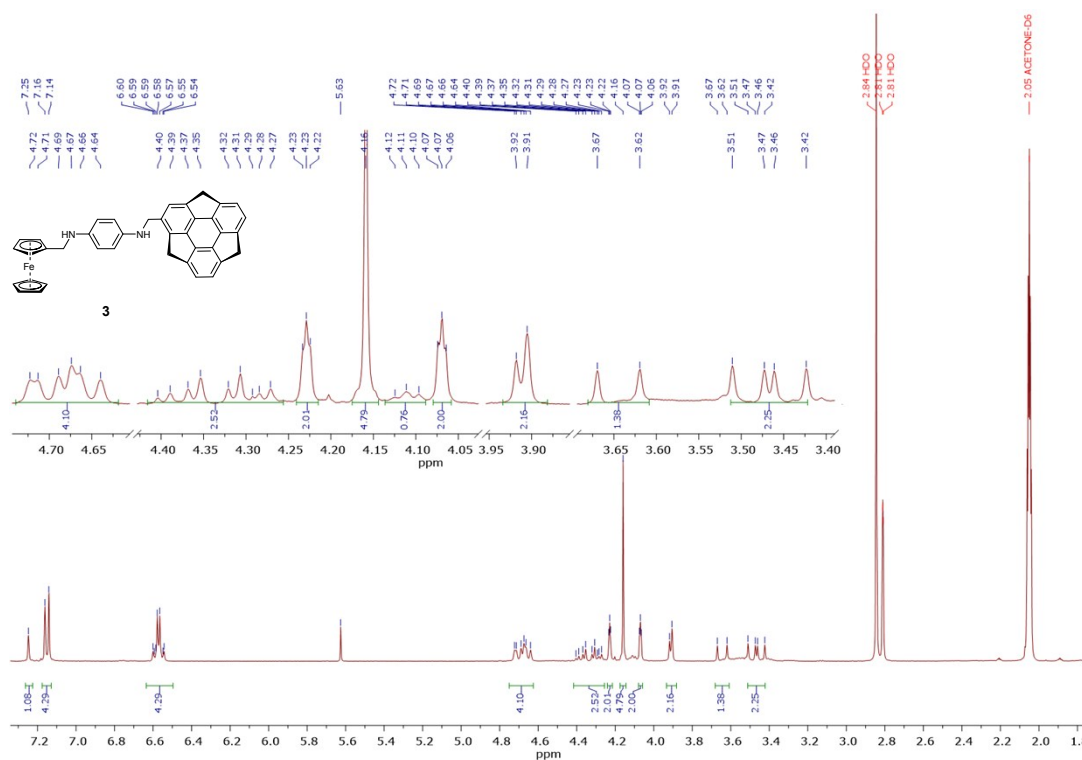

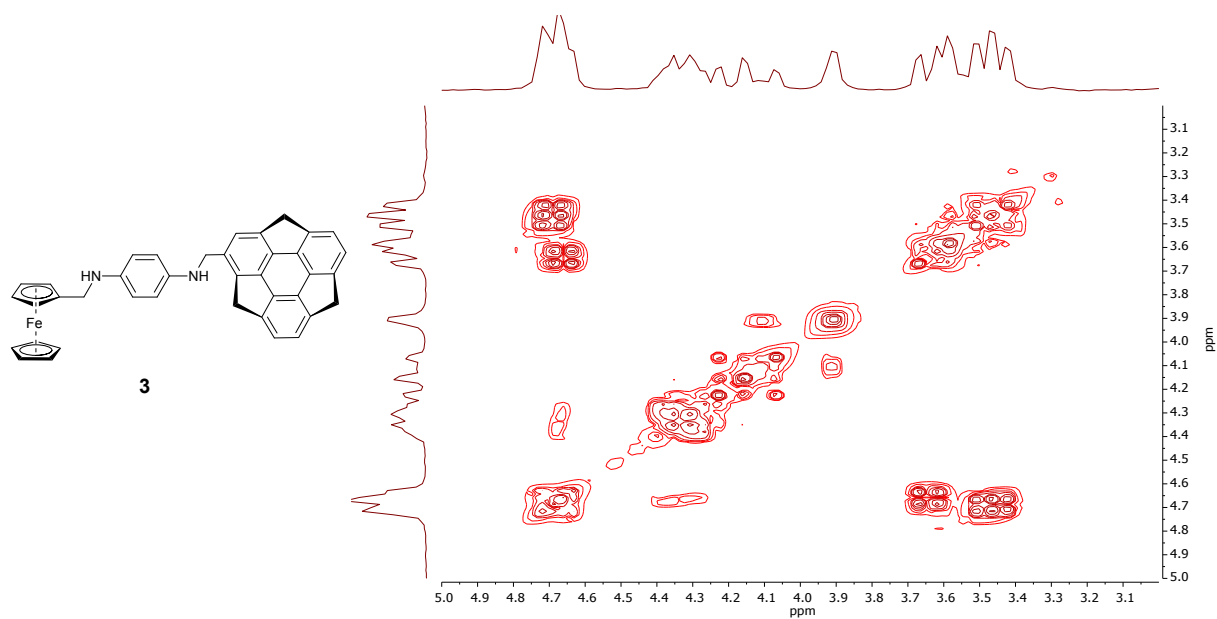

**Fig. S5.** Inset of  $^1\text{H}$ - $^1\text{H}$  COSY NMR ( $(\text{CD}_3)_2\text{CO}$ , 400 MHz) spectrum of compound **3**.

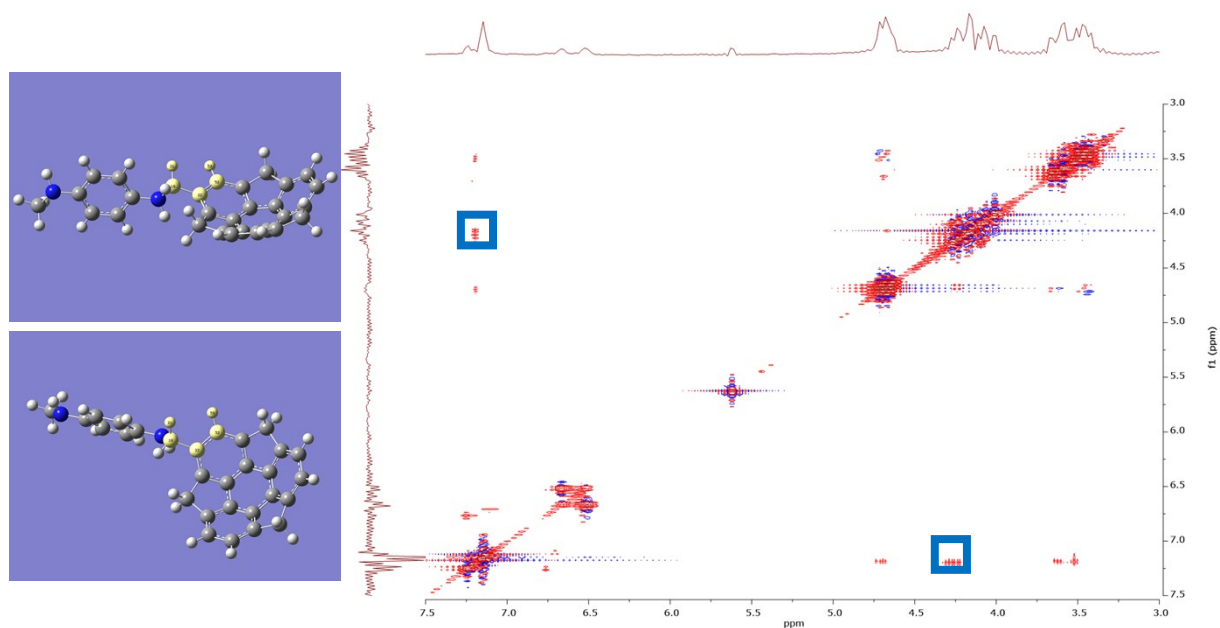

**Fig. S6.**  $^1\text{H}$ - $^1\text{H}$  TOCSY NMR ( $(\text{CD}_3)_2\text{CO}$ , 400 MHz) spectrum of compound **3** together with the representation of the optimized partial structure of compound **3**.<sup>[10]</sup> The crucial cross-correlations are marked in blue.

**Table S1.** Graphical representation and summary of the data on the crucial cross-correlations observed in the  $^1\text{H}$ - $^1\text{H}$  COSY (marked blue) and  $^1\text{H}$ - $^1\text{H}$  TOCSY (marked red) spectra of compound **3** (spectra recorded in  $(\text{CD}_3)_2\text{CO}$ ). The chemical shifts for the respective protons are also presented. Cross-correlation between  $\text{CH}_2$ -sumanene (4.40-4.27 ppm) and  $\text{H-Ar}$  of sumanene (7.25-7.16 ppm) observed in the  $^1\text{H}$ - $^1\text{H}$  TOCSY experiment, confirmed that the  $\text{CH}_2$ -sumanene diastereotopic protons and  $\text{H-Ar}$  of sumanene are included in the same spin system (U-shaped system, see the graphical representation in Fig. S6). This feature stands for the signal multiplicity of  $\text{CH}_2$ -sumanene (multiplet, 4.40-4.27 ppm).

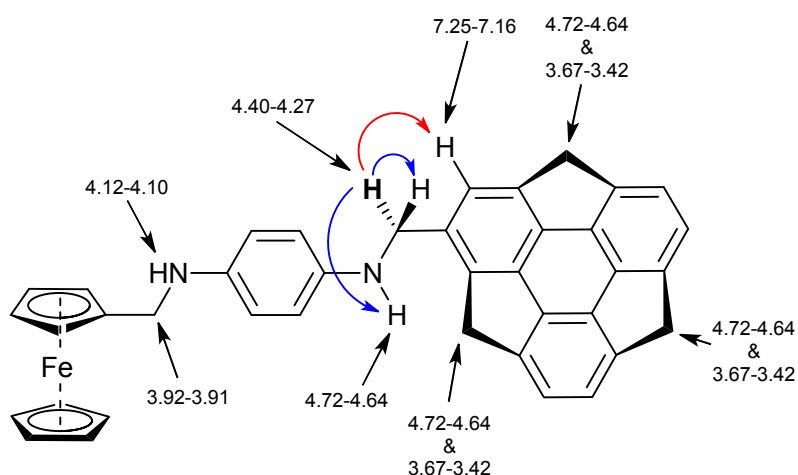

| Chemical shift [ppm] and peak assignment |                                             | 7.25-7.16 (m) | 4.72-4.64 (m)                               | 4.40-4.27 (m)             | 4.12-4.10 (t)          | 3.92-3.91 (d)      | 3.67-3.42 (3 x d) |
|------------------------------------------|---------------------------------------------|---------------|---------------------------------------------|---------------------------|------------------------|--------------------|-------------------|
|                                          |                                             | Ar (sumanene) | benzylic exo + NH-CH <sub>2</sub> -sumanene | CH <sub>2</sub> -sumanene | Fc-CH <sub>2</sub> -NH | Fc-CH <sub>2</sub> | benzylic endo     |
| 7.25-7.16 (m)                            | Ar (sumanene)                               |               |                                             | X                         |                        |                    |                   |
| 4.72-4.64 (m)                            | benzylic exo + NH-CH <sub>2</sub> -sumanene |               |                                             | X                         |                        |                    | X                 |
| 4.40-4.27 (m)                            | CH <sub>2</sub> -sumanene                   | X             | X                                           |                           |                        |                    |                   |
| 4.12-4.10 (t)                            | Fc-CH <sub>2</sub> -NH                      |               |                                             |                           |                        | X                  |                   |
| 3.92-3.91 (d)                            | Fc-CH <sub>2</sub>                          |               |                                             |                           | X                      |                    |                   |
| 3.67-3.42 (3 x d)                        | benzylic endo                               |               | X                                           |                           |                        |                    |                   |

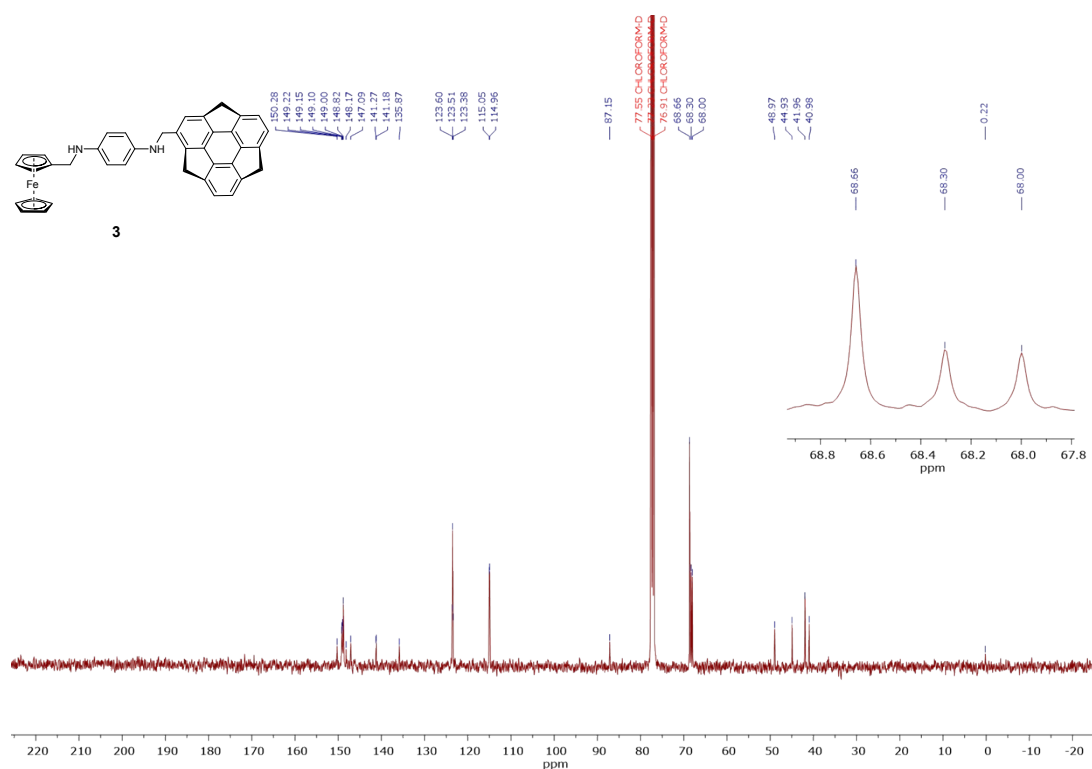

**Fig. S7.** <sup>13</sup>C NMR (CDCl<sub>3</sub>, 100 MHz) spectrum of compound **3**.

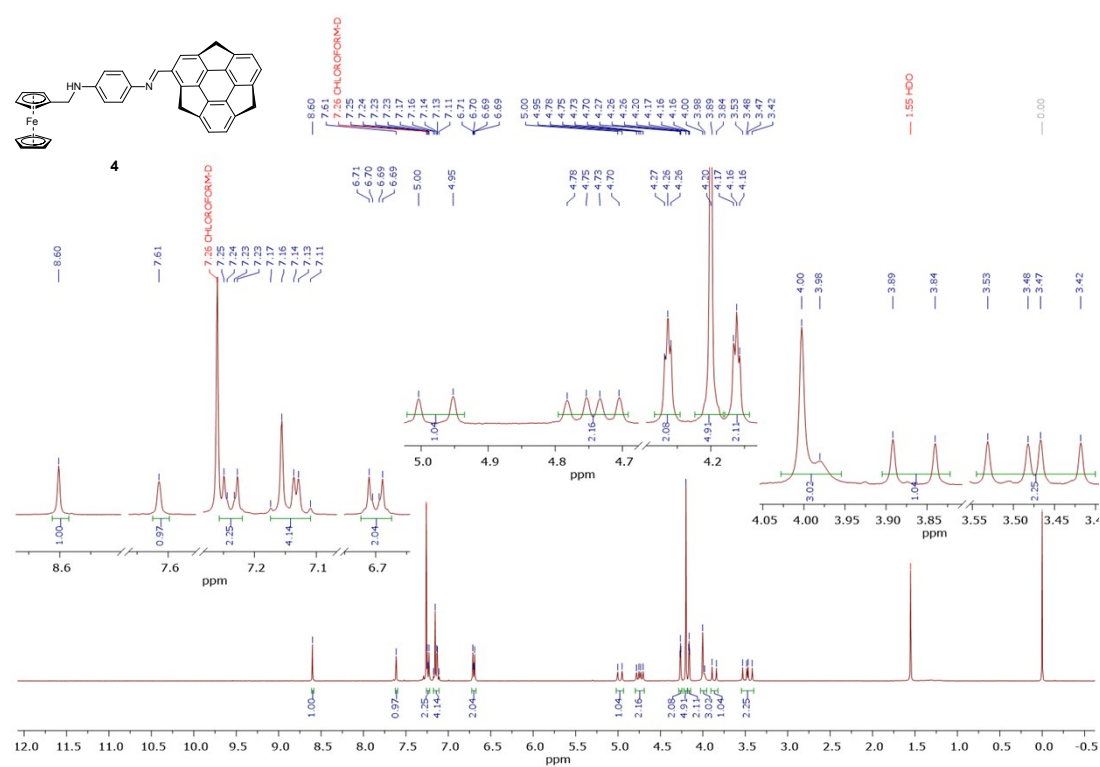

**Fig. S8.** <sup>1</sup>H NMR (CDCl<sub>3</sub>, 400 MHz) spectrum of compound **4**.

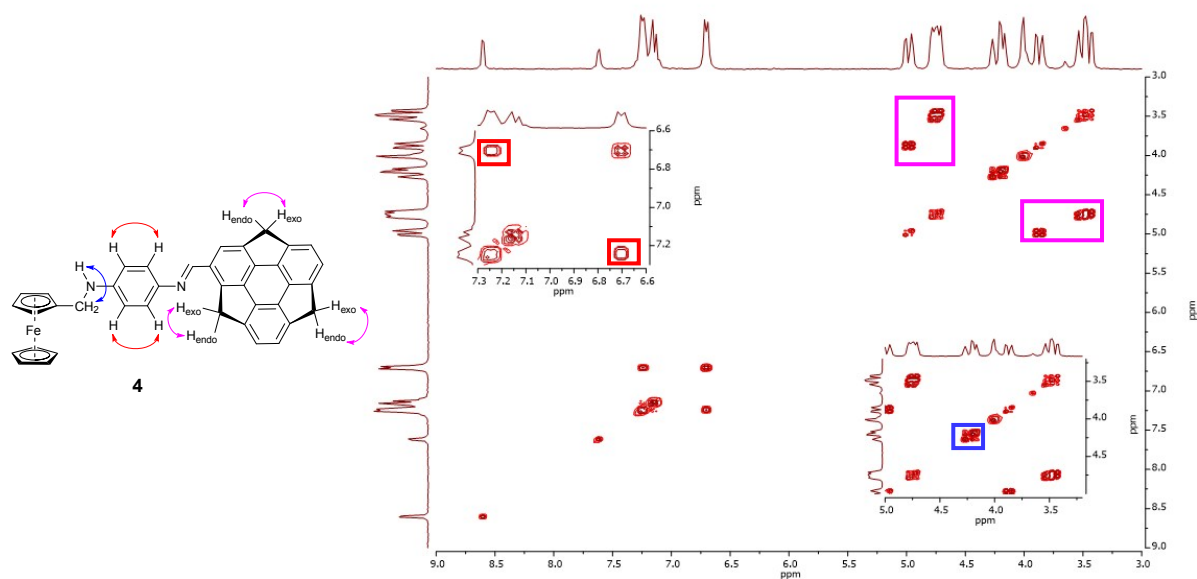

**Fig. S9.**  $^1\text{H}$ - $^1\text{H}$  COSY NMR (CDCl<sub>3</sub>, 400 MHz) spectrum of compound **4**. The crucial cross correlations are also marked.

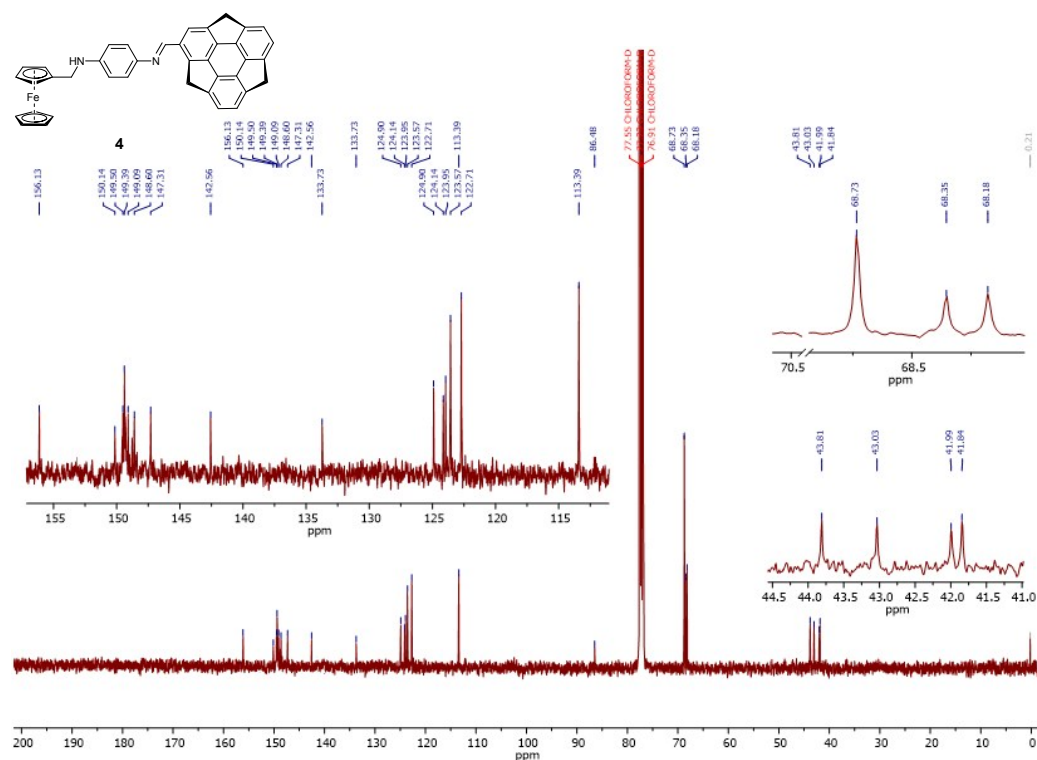

**Fig. S10.**  $^{13}\text{C}$  NMR (CDCl<sub>3</sub>, 100 MHz) spectrum of compound **4**.

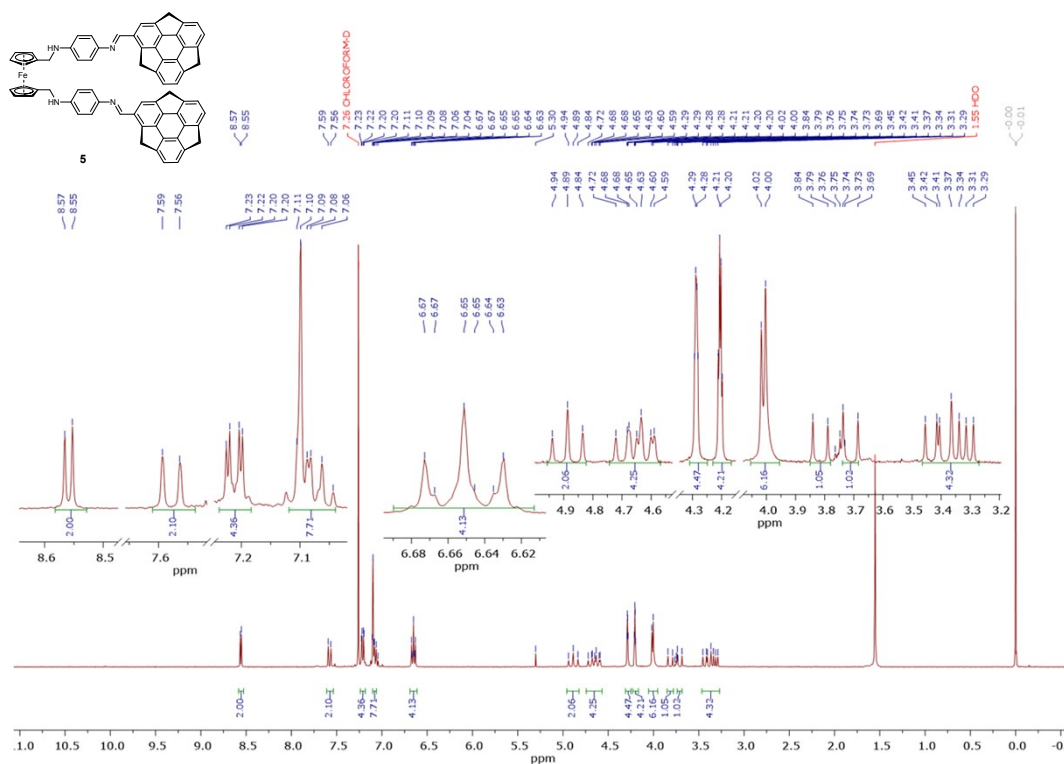

**Fig. S11.**  $^1\text{H}$  NMR ( $\text{CDCl}_3$ , 400 MHz) spectrum of compound **5**.

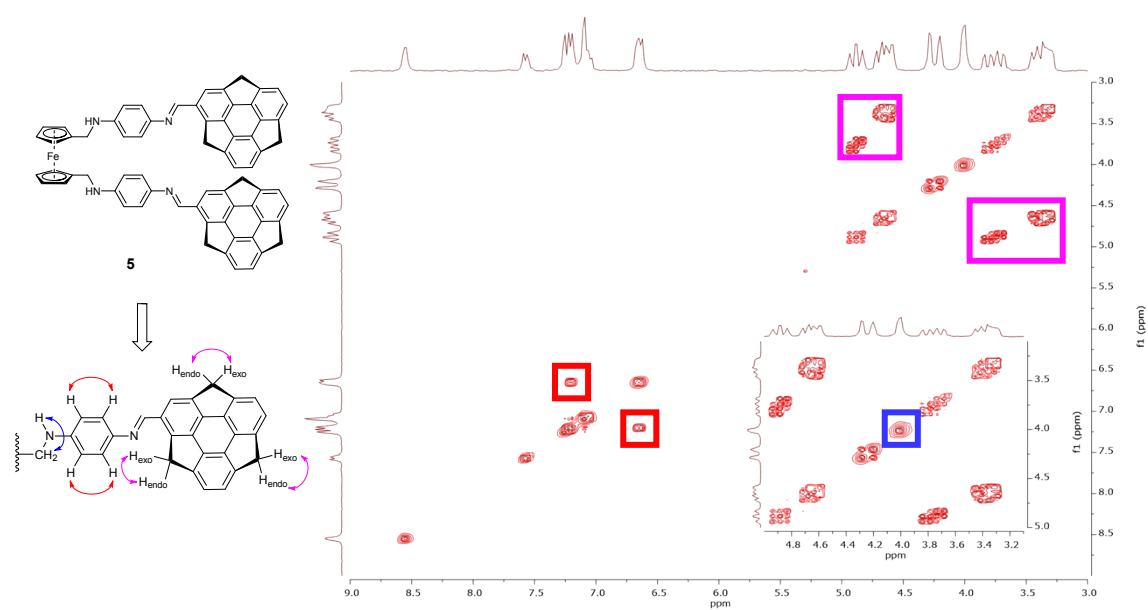

**Fig. S12.**  $^1\text{H}$ - $^1\text{H}$  COSY NMR ( $\text{CDCl}_3$ , 400 MHz) spectrum of compound **5**. The crucial cross correlations are also marked.



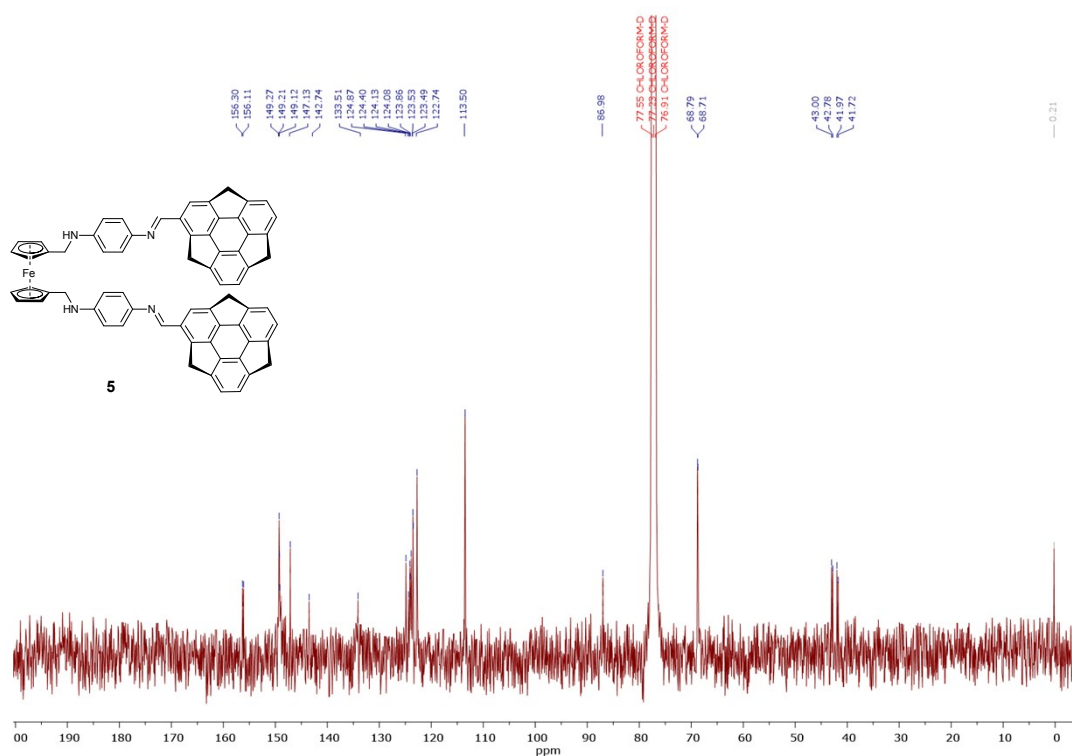

**Fig. S13.**  $^{13}\text{C}$  NMR (CDCl<sub>3</sub>, 100 MHz) spectrum of compound **5**.

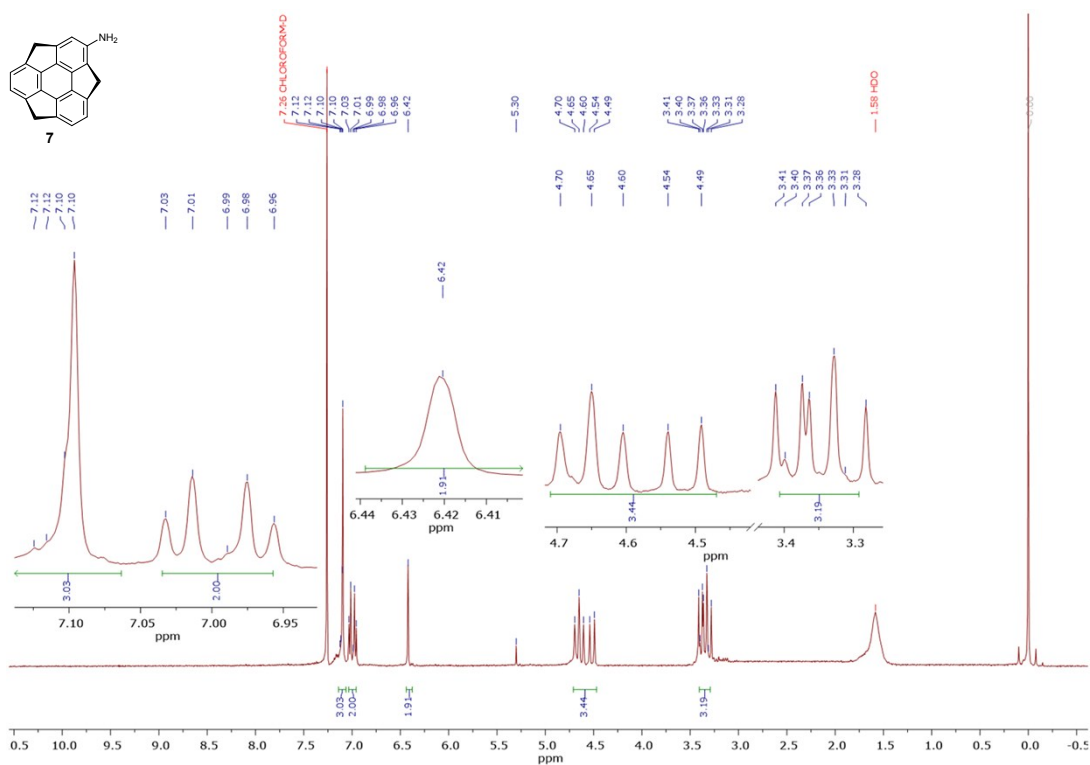

**Fig. S14.**  $^1\text{H}$  NMR (CDCl<sub>3</sub>, 400 MHz) spectrum of compound **7**.

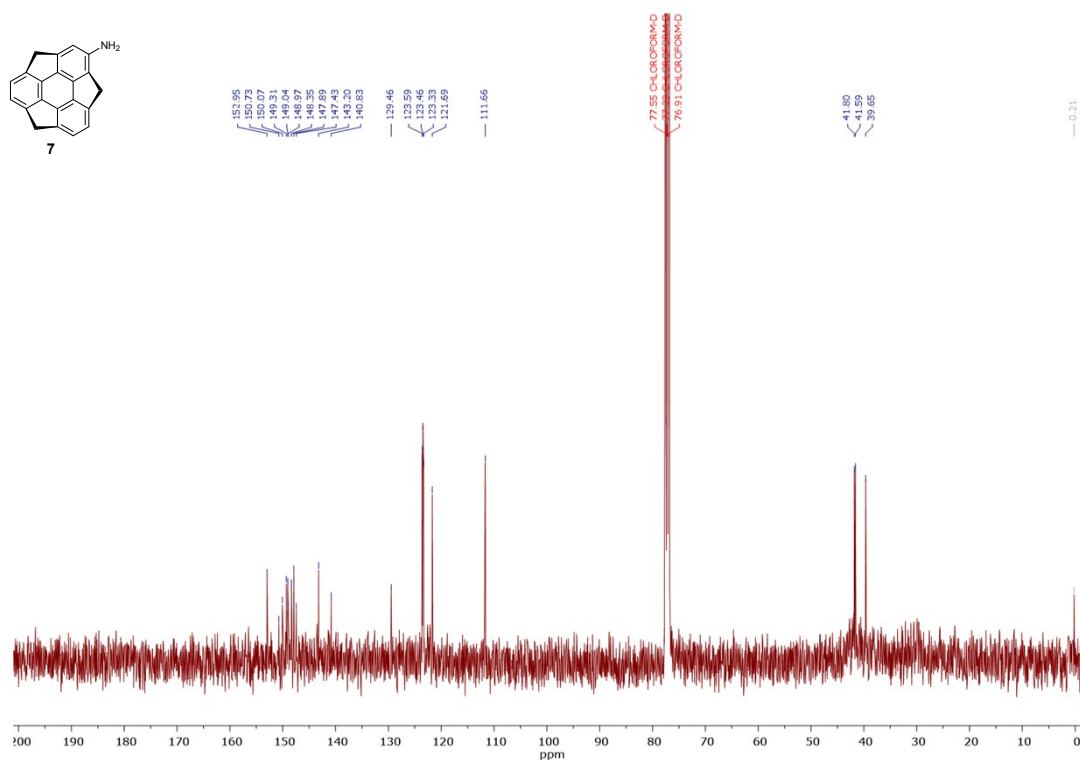

**Fig. S15.**  $^{13}\text{C}$  NMR ( $\text{CDCl}_3$ , 100 MHz) spectrum of compound **7**.

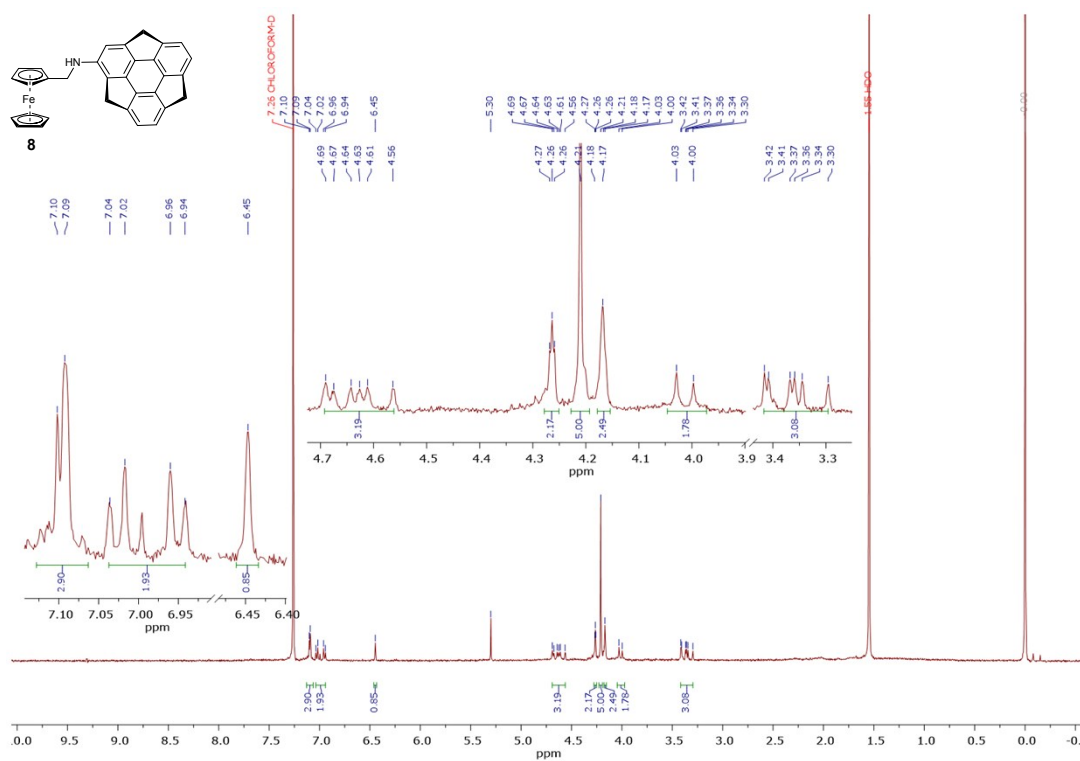

**Fig. S16.**  $^1\text{H}$  NMR ( $\text{CDCl}_3$ , 400 MHz) spectrum of compound **8**.

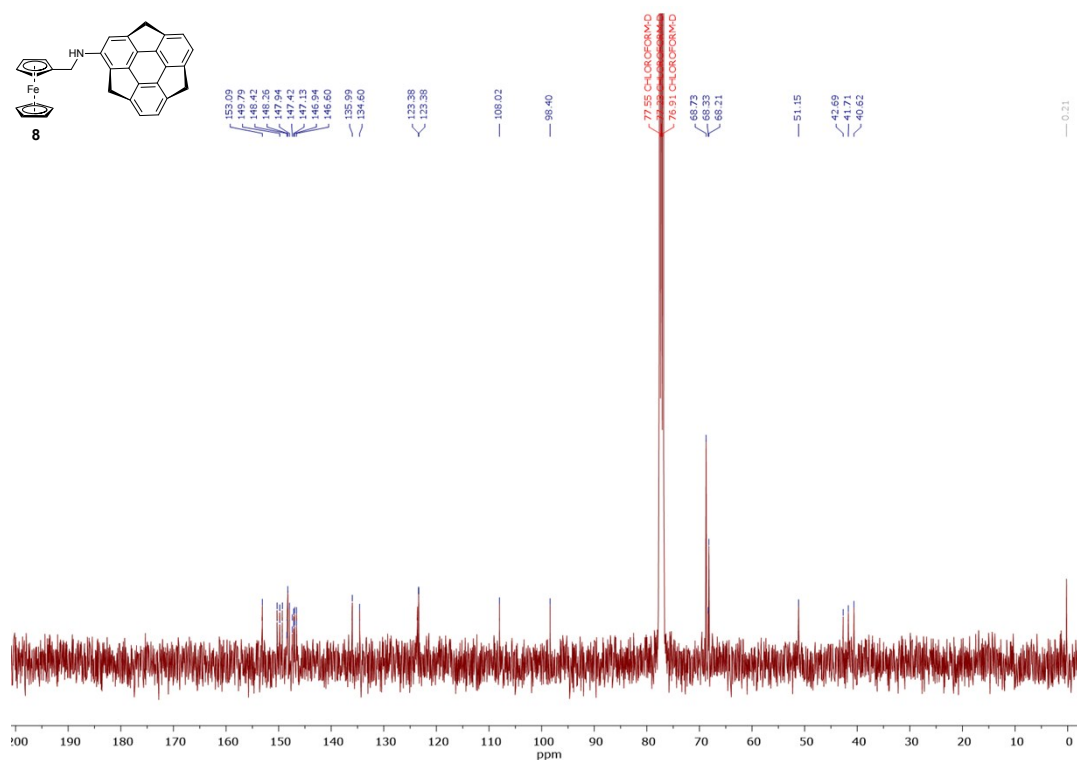

**Fig. S17.** <sup>13</sup>C NMR (CDCl<sub>3</sub>, 100 MHz) spectrum of compound **8**.

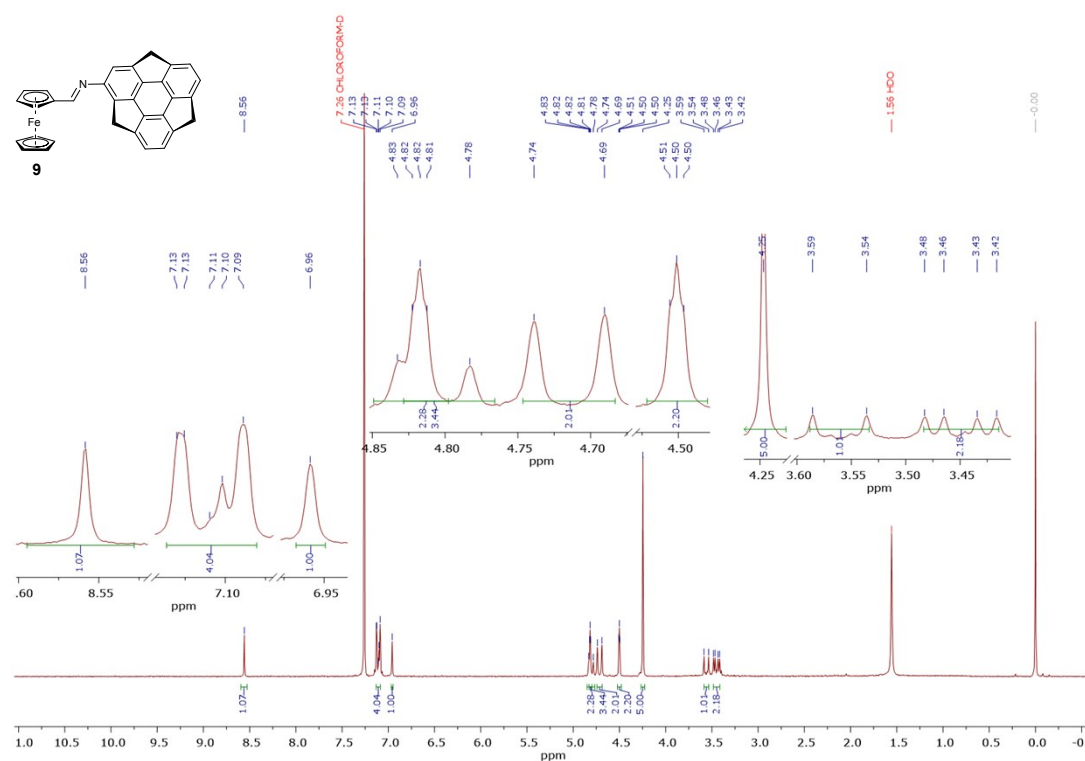

**Fig. S18.** <sup>1</sup>H NMR (CDCl<sub>3</sub>, 400 MHz) spectrum of compound **9**.

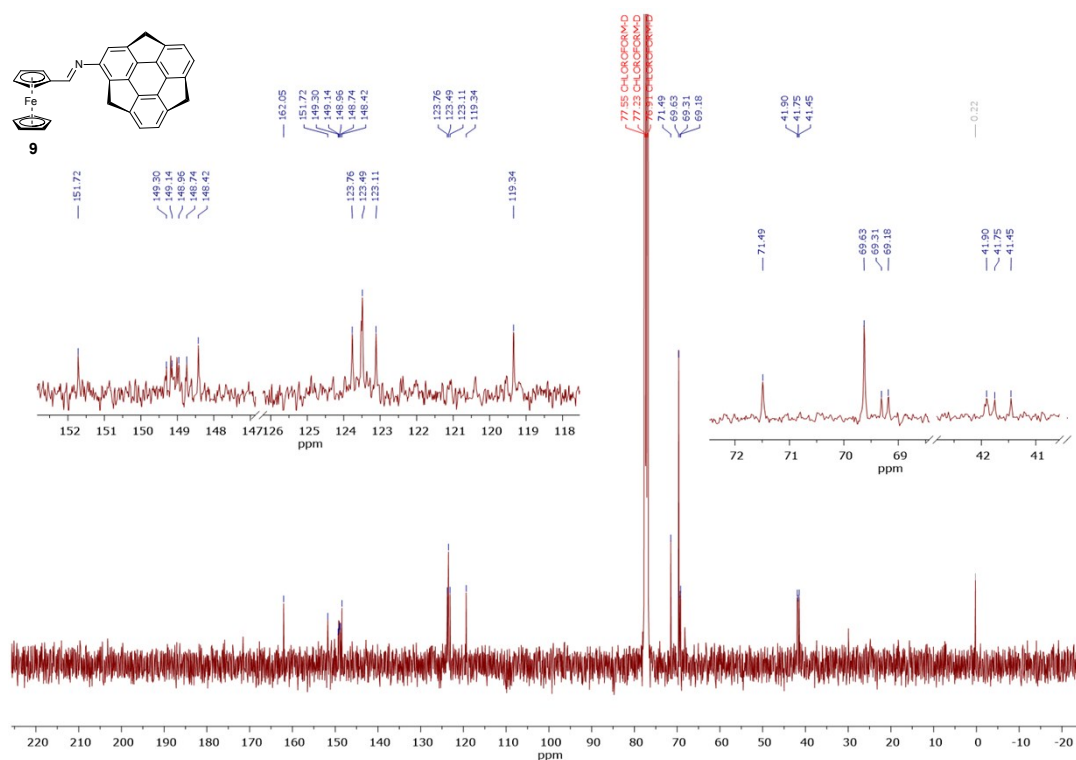

**Fig. S19.** <sup>13</sup>C NMR (CDCl<sub>3</sub>, 100 MHz) spectrum of compound **9**.

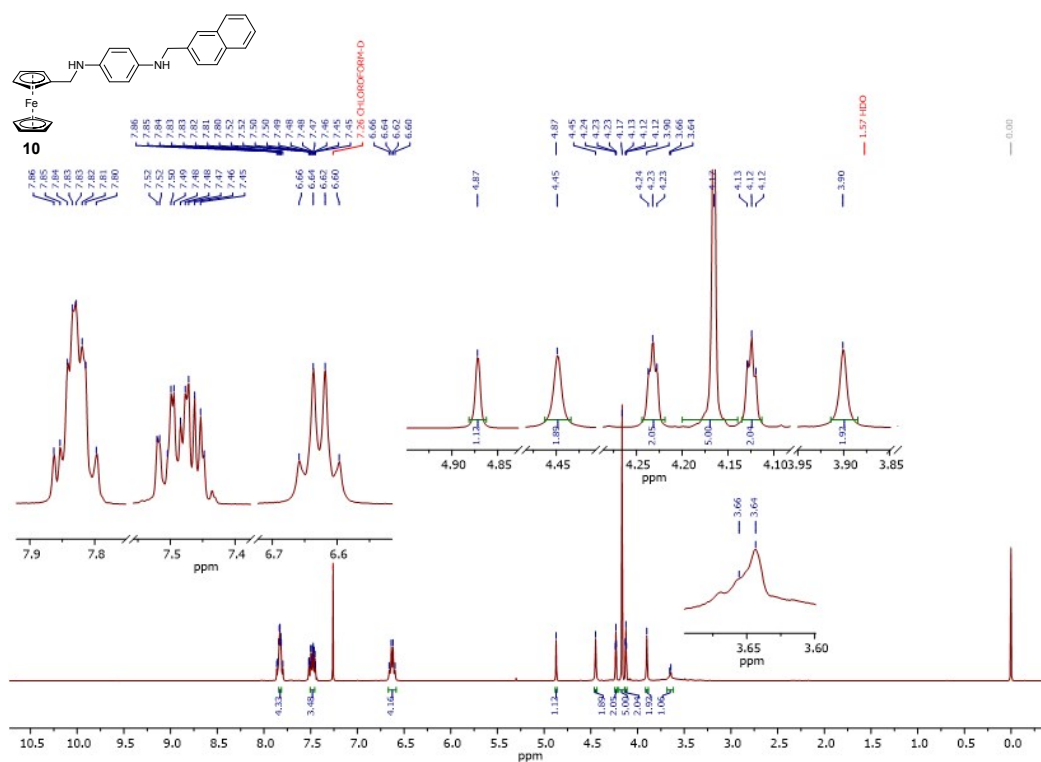

**Fig. S20.** <sup>1</sup>H NMR (CDCl<sub>3</sub>, 400 MHz) spectrum of compound **10**.

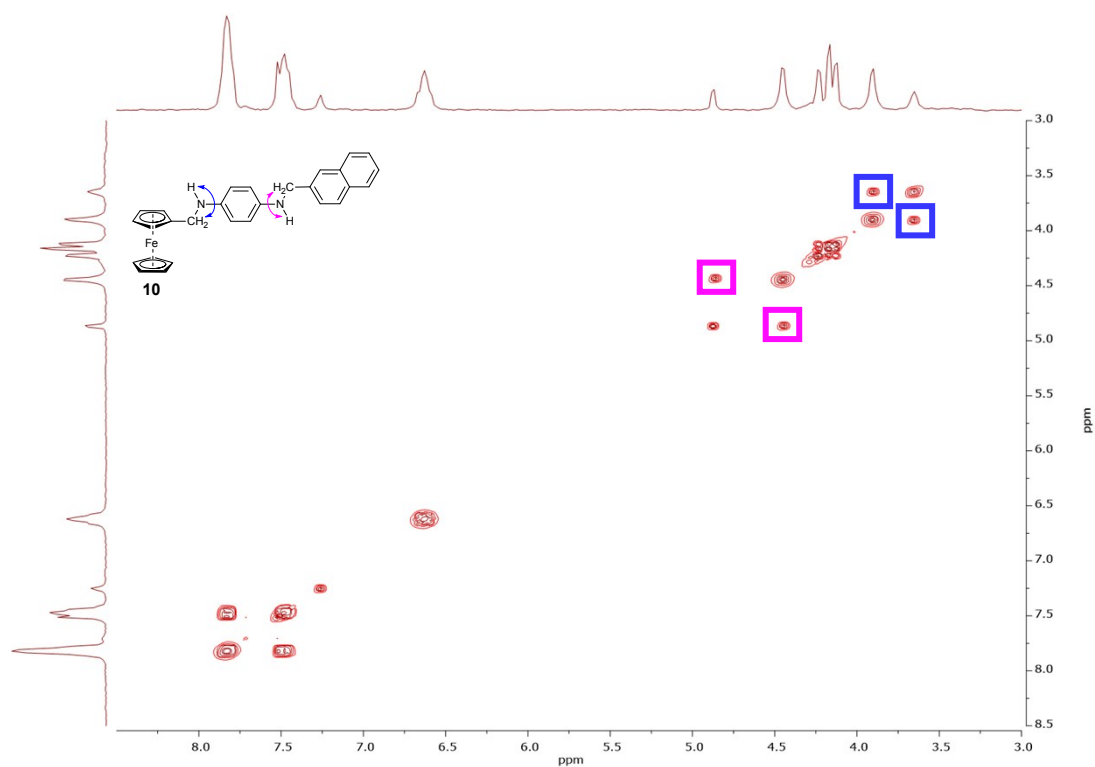

**Fig. S21.**  $^1\text{H}$ - $^1\text{H}$  COSY NMR ( $\text{CDCl}_3$ , 400 MHz) spectrum of compound **10**. The crucial cross correlations are also marked.

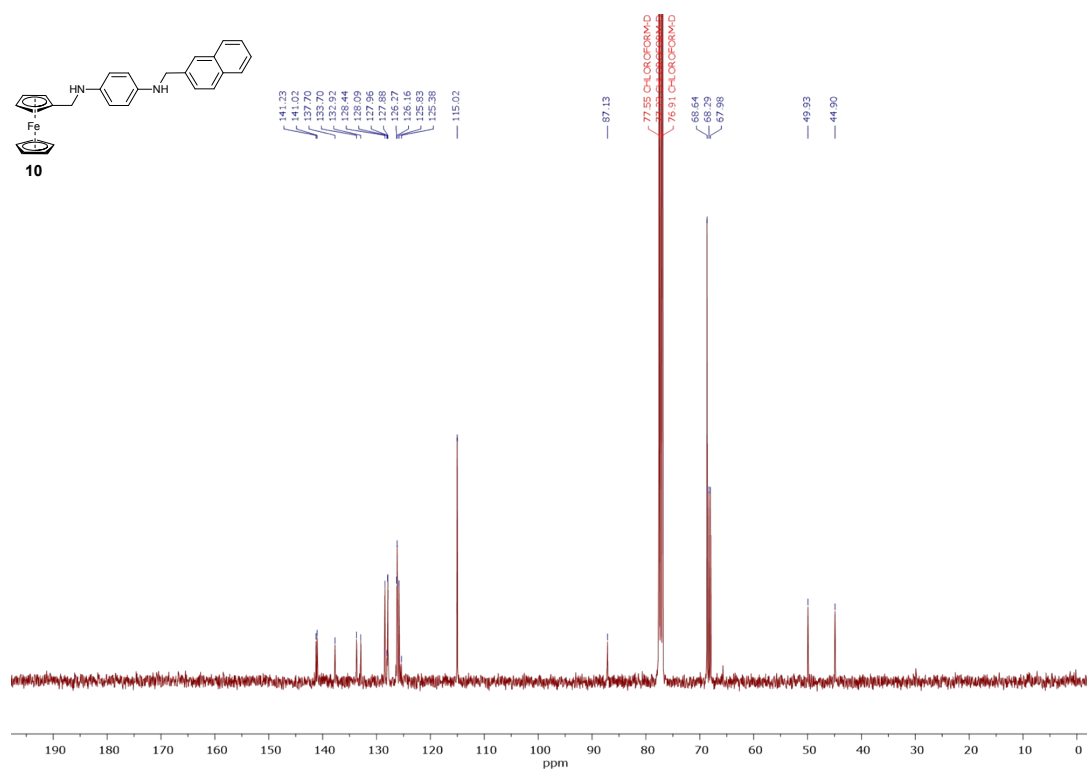

**Fig. S22.**  $^{13}\text{C}$  NMR ( $\text{CDCl}_3$ , 100 MHz) spectrum of compound **10**.

### S3. IR spectra

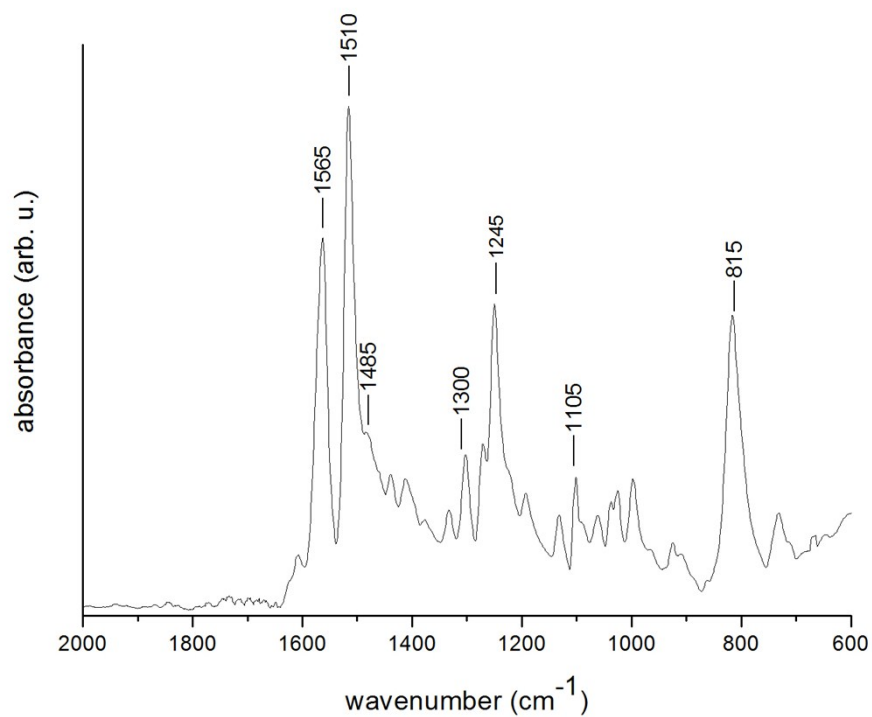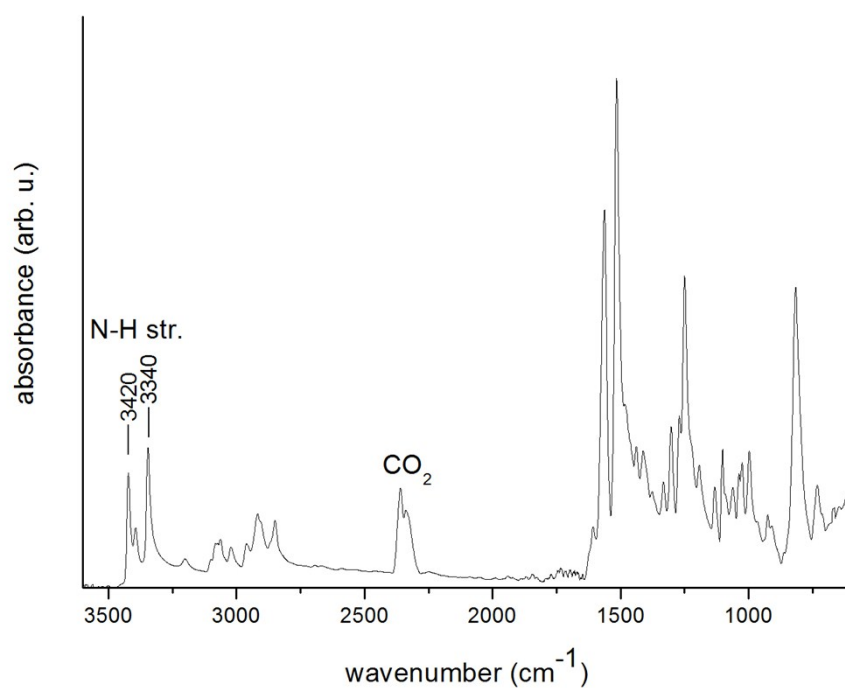

**Fig. S23.** IR (ATR) spectrum of compound **Fc-5** in the wavenumber range of 2000-600  $\text{cm}^{-1}$  (**top**) and in the range of 3600-600  $\text{cm}^{-1}$  showing NH stretching vibrations (**bottom**).

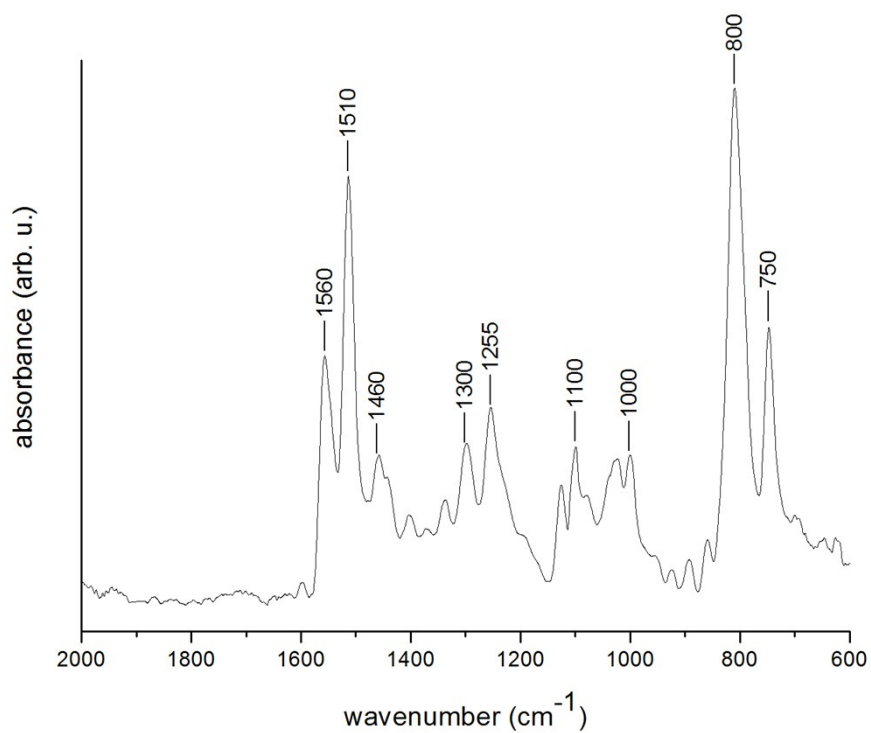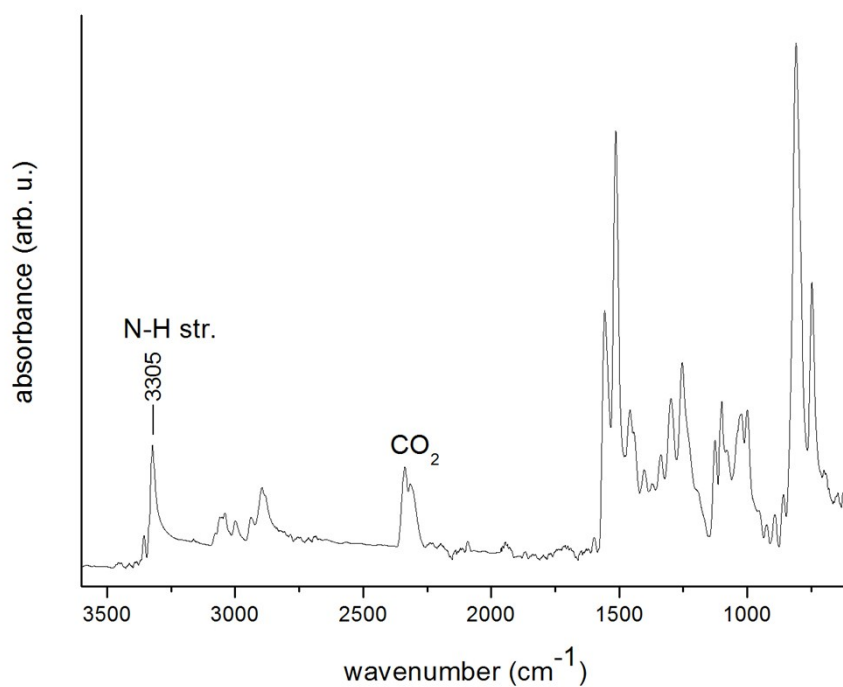

**Fig. S24.** IR (ATR) spectrum of compound **3** in the wavenumber range of 2000-600 cm<sup>-1</sup> (**top**) and in the range of 3600-600 cm<sup>-1</sup> showing NH stretching vibrations (**bottom**).

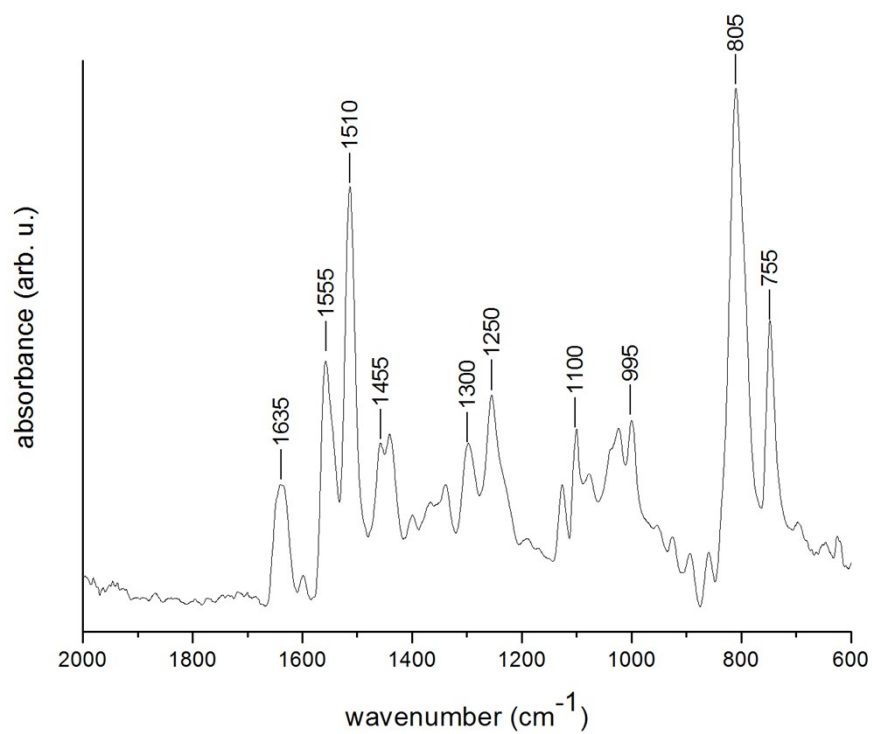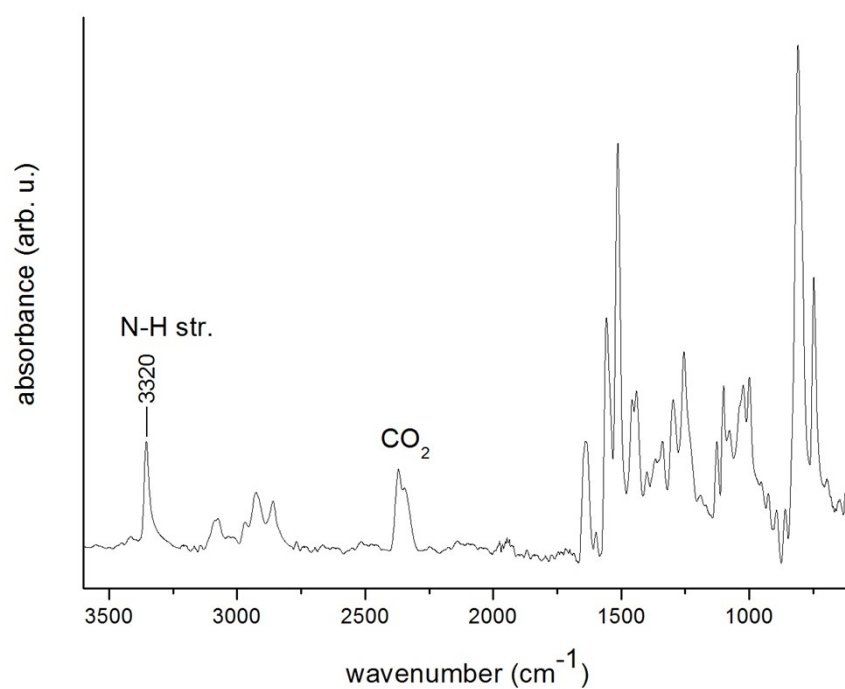

**Fig. S25.** IR (ATR) spectrum of compound **4** in the wavenumber range of 2000-600 cm<sup>-1</sup> (**top**) and in the range of 3600-600 cm<sup>-1</sup> showing NH stretching vibrations (**bottom**).



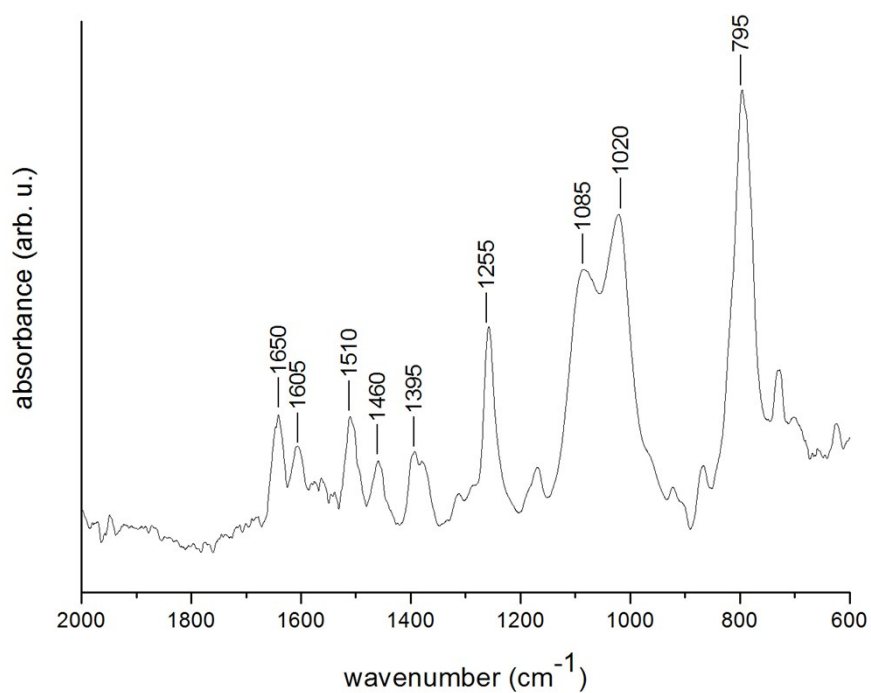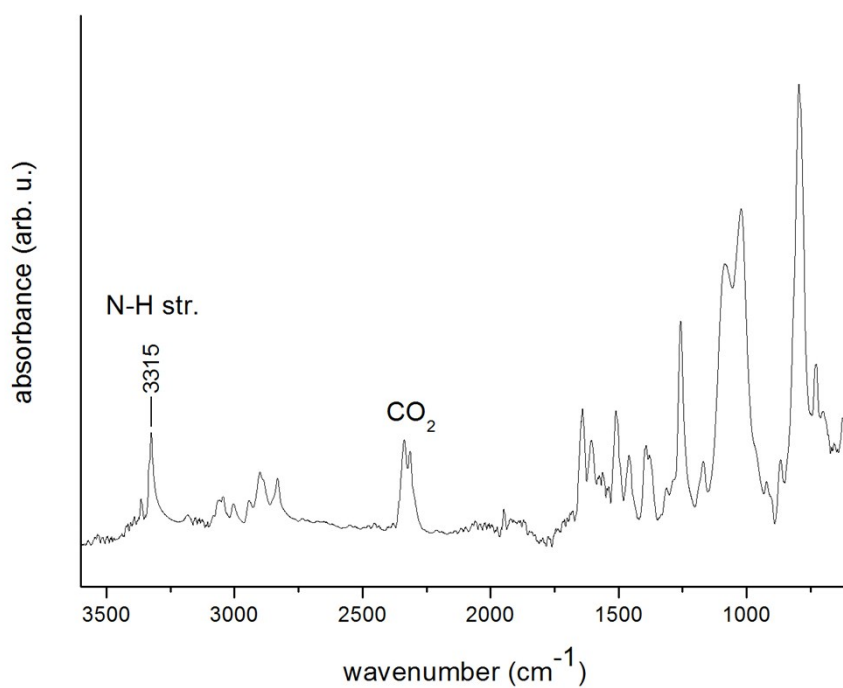

**Fig. S26.** IR (ATR) spectrum of compound **5** in the wavenumber range of 2000-600 cm<sup>-1</sup> (**top**) and in the range of 3600-600 cm<sup>-1</sup> showing NH stretching vibrations (**bottom**).

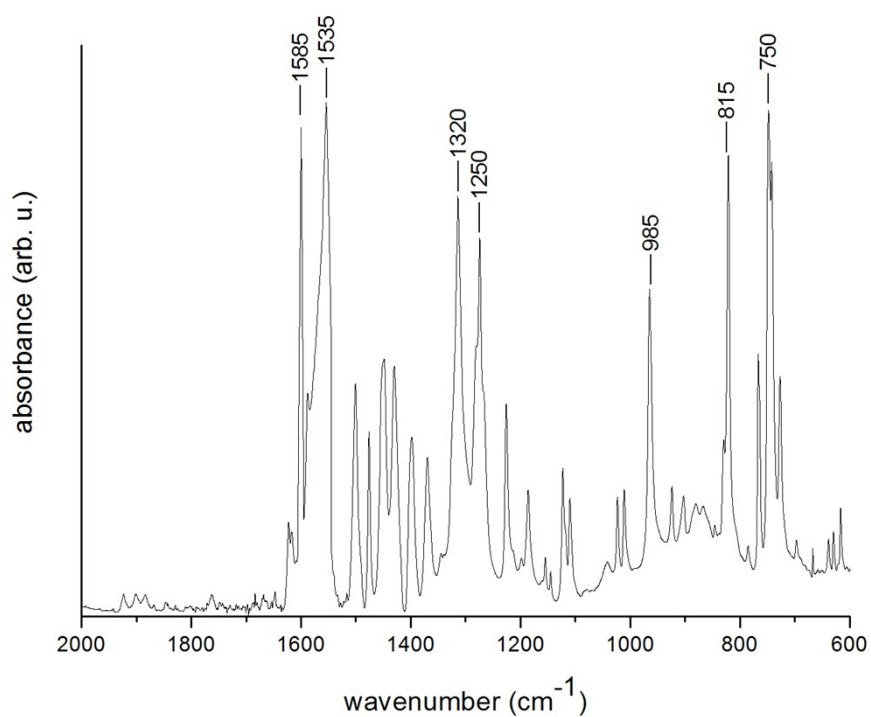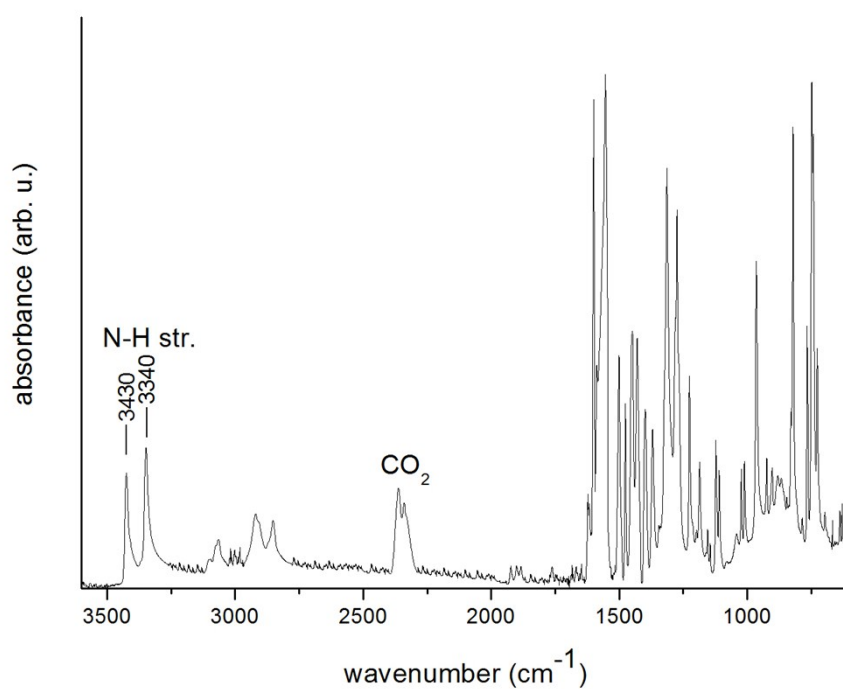

**Fig. S27.** IR (ATR) spectrum of aminosumanene (**7**) in the wavenumber range of 2000-600 cm<sup>-1</sup> (**top**) and in the range of 3600-600 cm<sup>-1</sup> showing NH stretching vibrations (**bottom**).

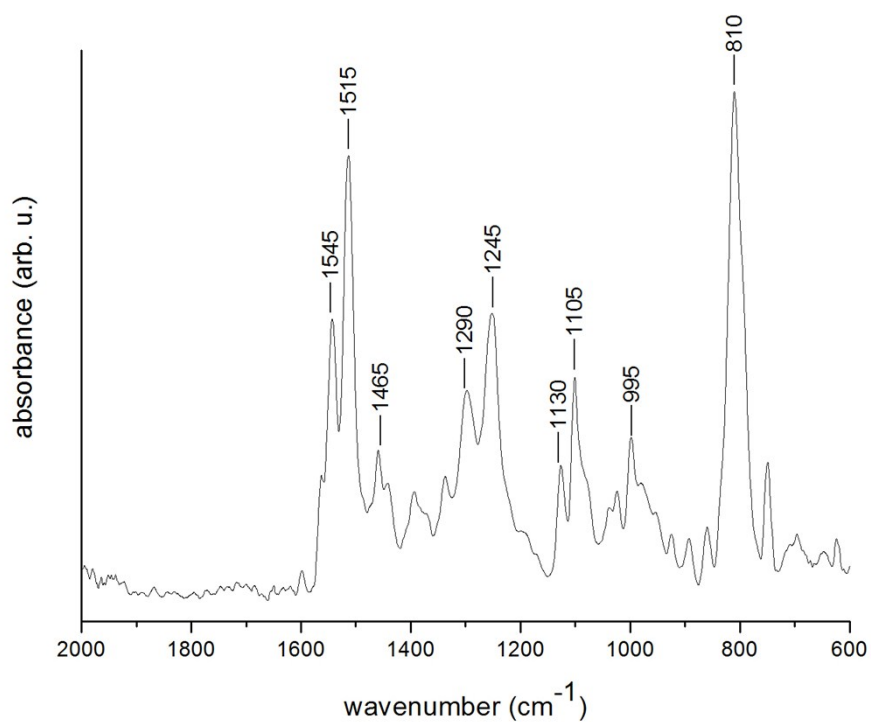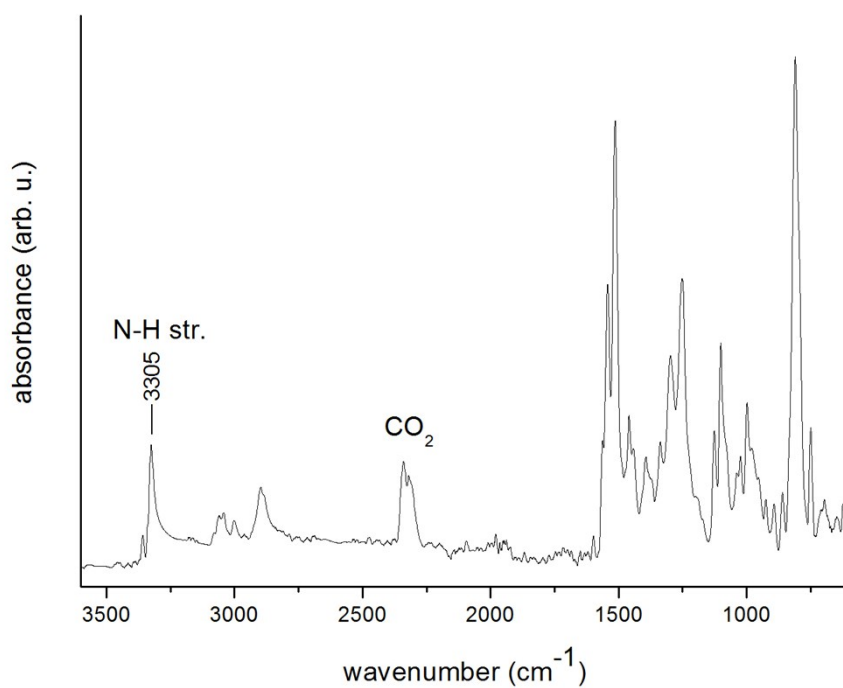

**Fig. S28.** IR (ATR) spectrum of compound **8** in the wavenumber range of 2000-600 cm<sup>-1</sup> (**top**) and in the range of 3600-600 cm<sup>-1</sup> showing NH stretching vibrations (**bottom**).

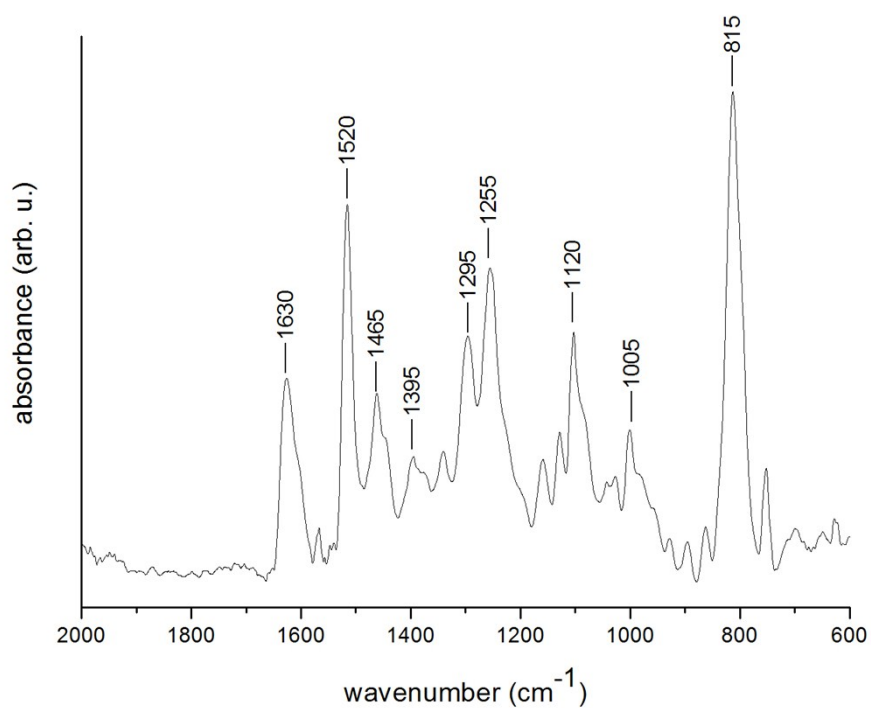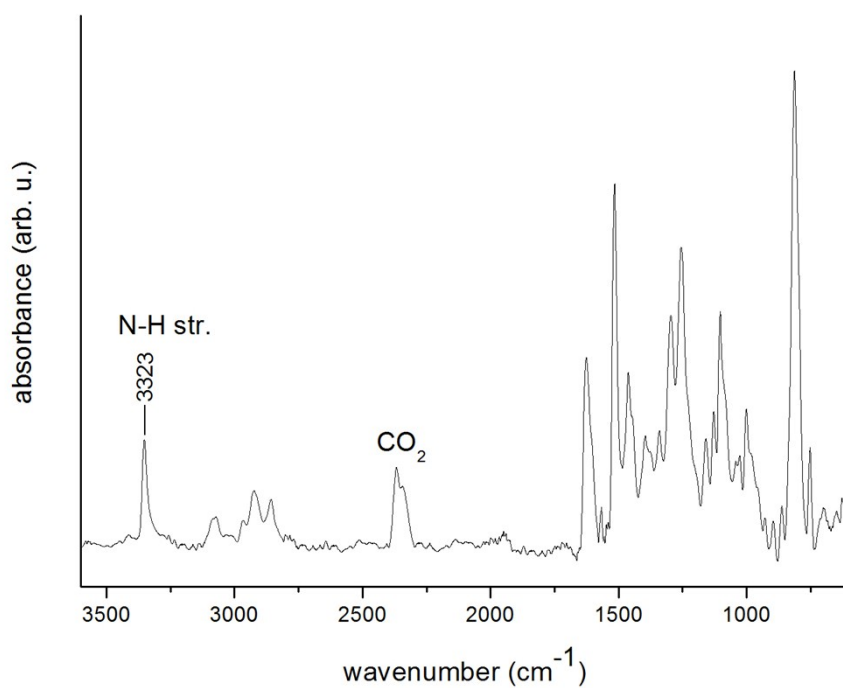

**Fig. S29.** IR (ATR) spectrum of compound **9** in the wavenumber range of 2000-600 cm<sup>-1</sup> (**top**) and in the range of 3600-600 cm<sup>-1</sup> showing NH stretching vibrations (**bottom**).

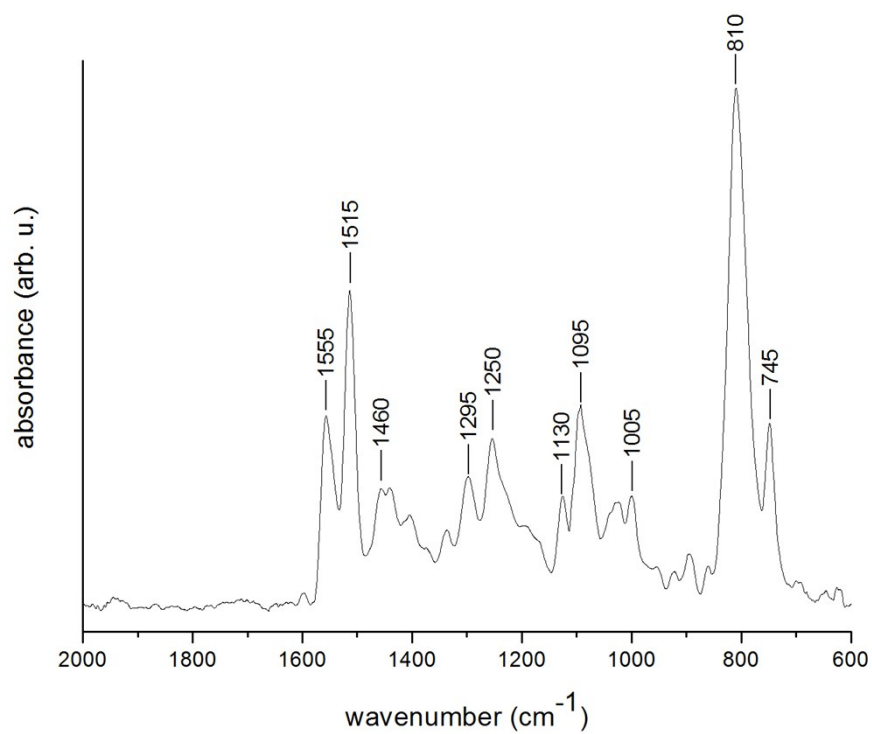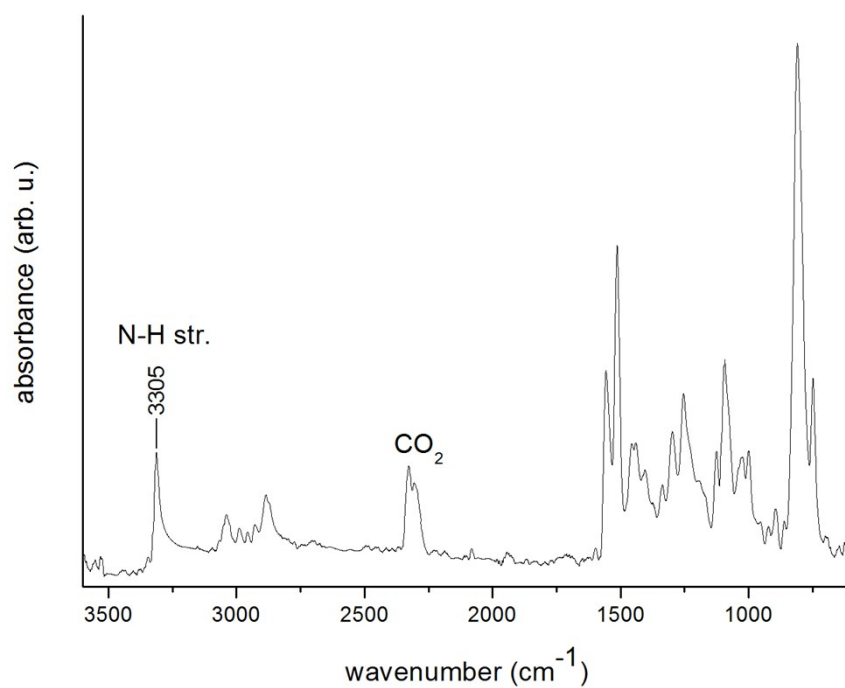

**Fig. S30.** IR (ATR) spectrum of compound **10** in the wavenumber range of 2000-600  $\text{cm}^{-1}$  (**top**) and in the range of 3600-600  $\text{cm}^{-1}$  showing NH stretching vibrations (**bottom**).

## S4. UV-Vis spectra

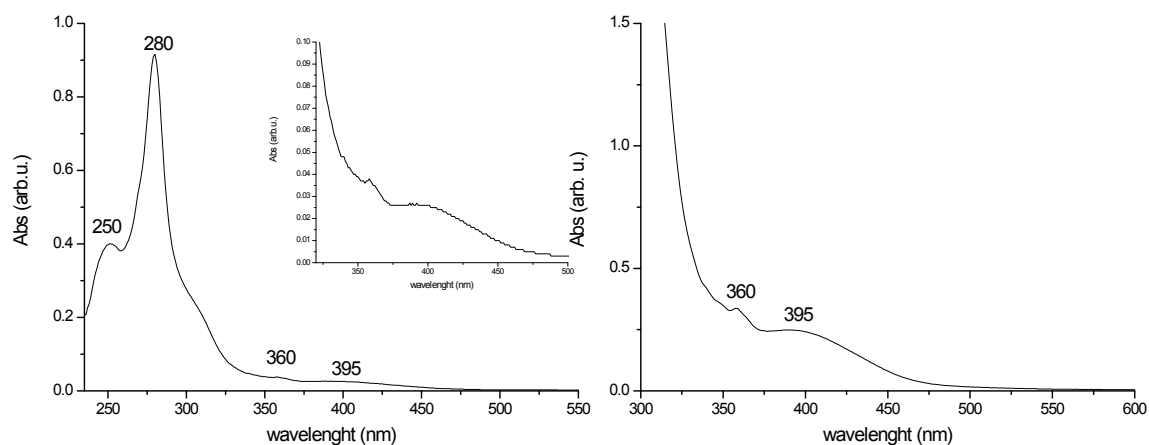

**Fig. S31.** UV-Vis spectra of compound **3** (solvent: CHCl<sub>3</sub>:MeOH = 1:1 v/v; concentration: 1·10<sup>-5</sup> M (left), 1·10<sup>-4</sup> M (right)).

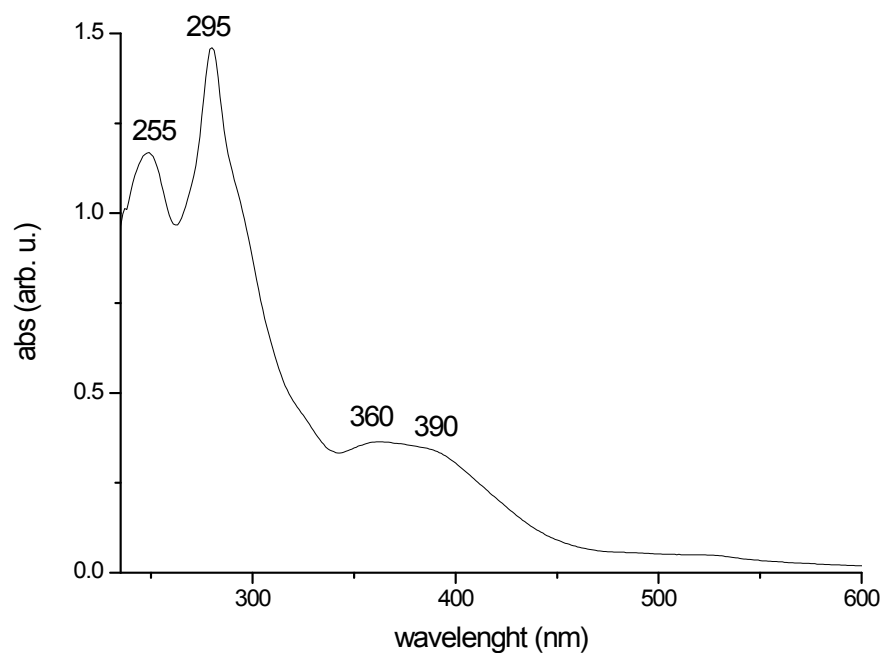

**Fig. S32.** UV-Vis spectrum of compound **4** (solvent: CHCl<sub>3</sub>:MeOH = 1:1 v/v; concentration: 1·10<sup>-4</sup> M).

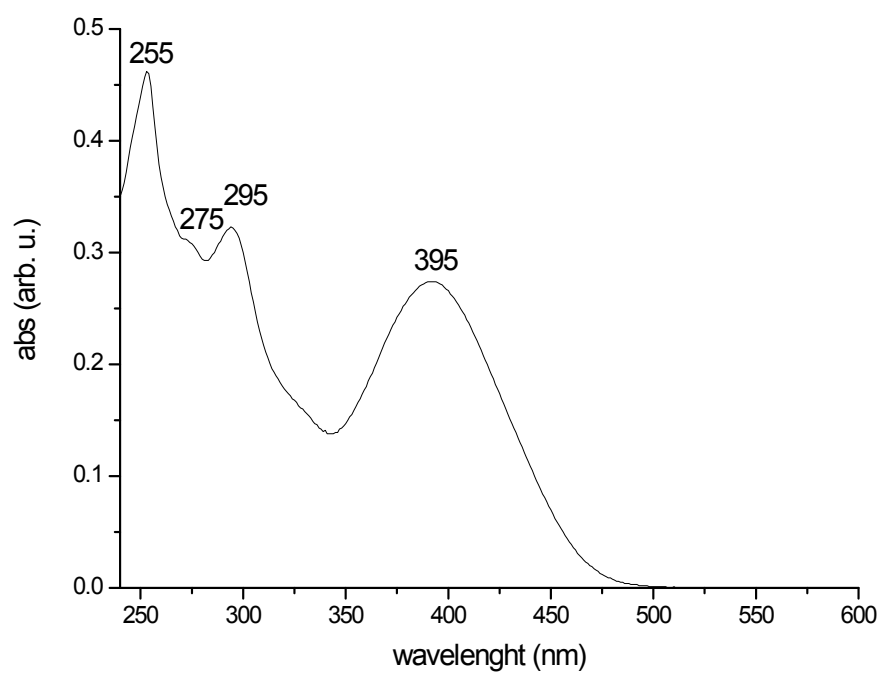

**Fig. S33.** UV-Vis spectrum of compound **5** (solvent:  $\text{CHCl}_3\text{:MeOH} = 1\text{:}1$  v/v; concentration:  $1 \cdot 10^{-5}$  M).

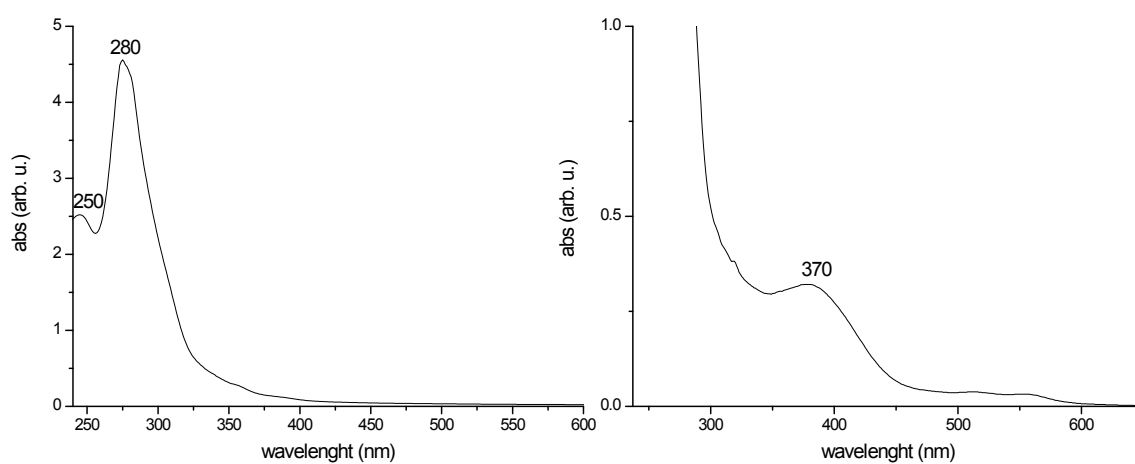

**Fig. S34.** UV-Vis spectra of compound **8** (solvent:  $\text{CHCl}_3\text{:MeOH} = 1\text{:}1$  v/v;  $1 \cdot 10^{-5}$  M (left),  $1 \cdot 10^{-4}$  M (right)).

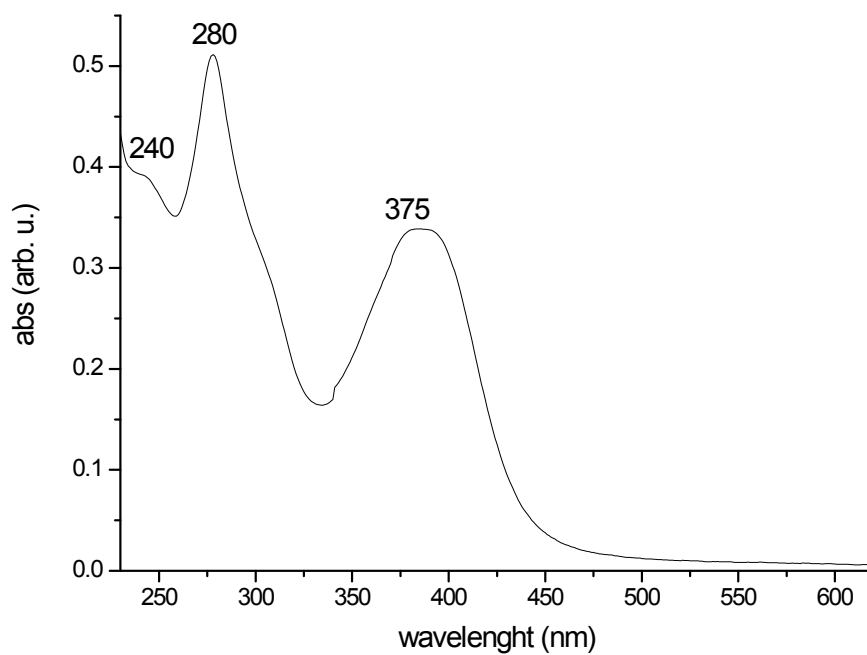

**Fig. S35.** UV-Vis spectrum of compound **9** (solvent:  $\text{CHCl}_3$ :MeOH = 1:1 v/v; concentration:  $1 \cdot 10^{-4}$  M).

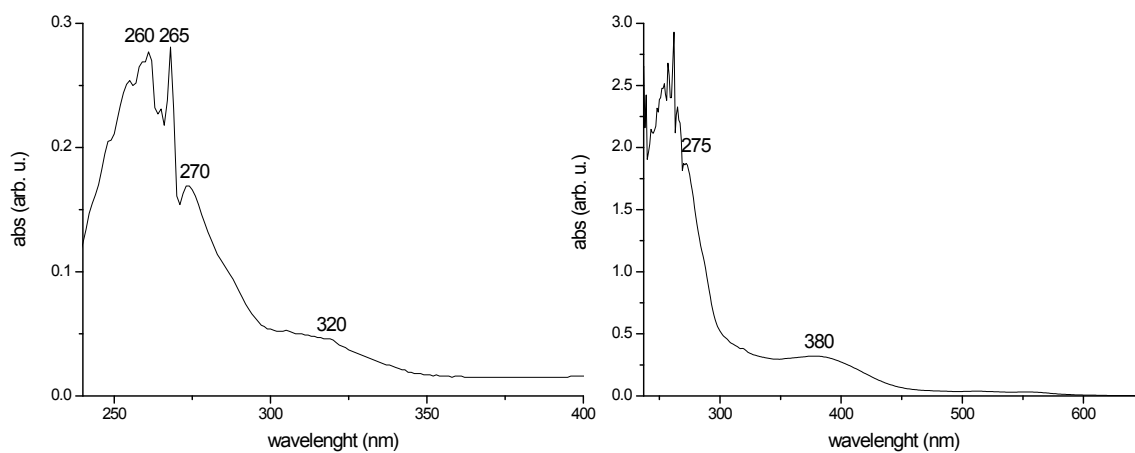

**Fig. S36.** UV-Vis spectra of compound **10** (solvent:  $\text{CHCl}_3$ :MeOH = 1:1 v/v; concentration:  $1 \cdot 10^{-5}$  M (left),  $1 \cdot 10^{-4}$  M (right)).



## S5. Fluorescence spectroscopy and titration experiments

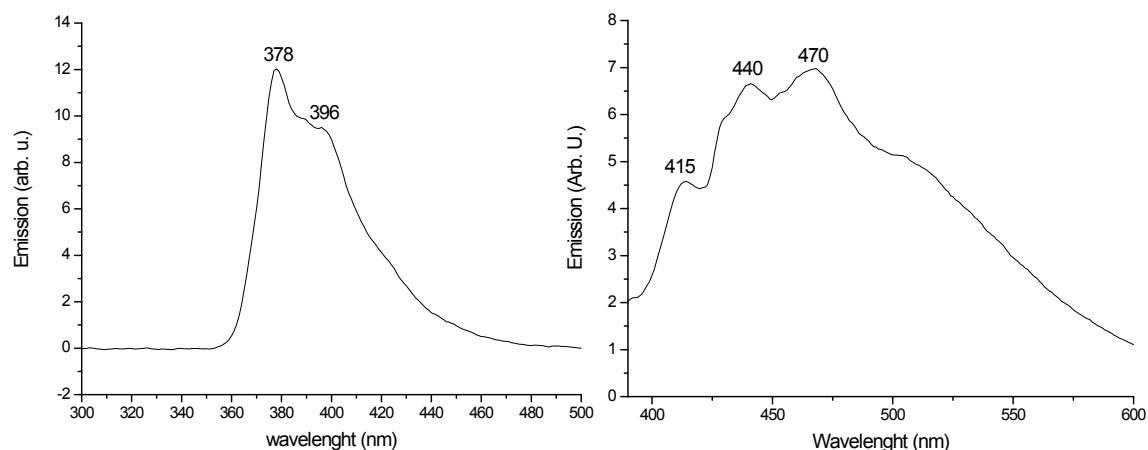

**Fig. S37.** Emission spectra of compound **3** (solvent:  $\text{CHCl}_3:\text{MeOH} = 1:1$  v/v; concentration:  $1 \cdot 10^{-4}$  M; excitation wavelength: 280 nm (left), 380 nm (right)).

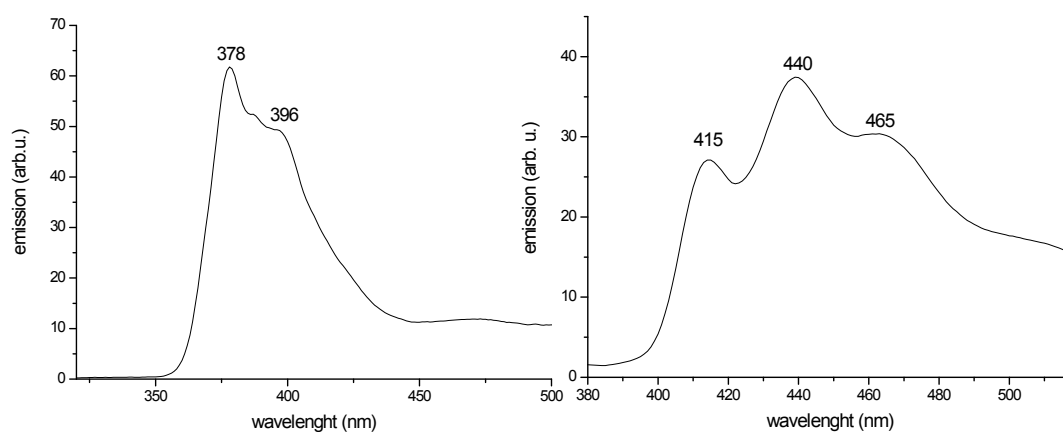

**Fig. S38.** Emission spectra of compound **4** (solvent:  $\text{CHCl}_3:\text{MeOH} = 1:1$  v/v; concentration:  $1 \cdot 10^{-4}$  M; excitation wavelength: 280 nm (left), 380 nm (right)).

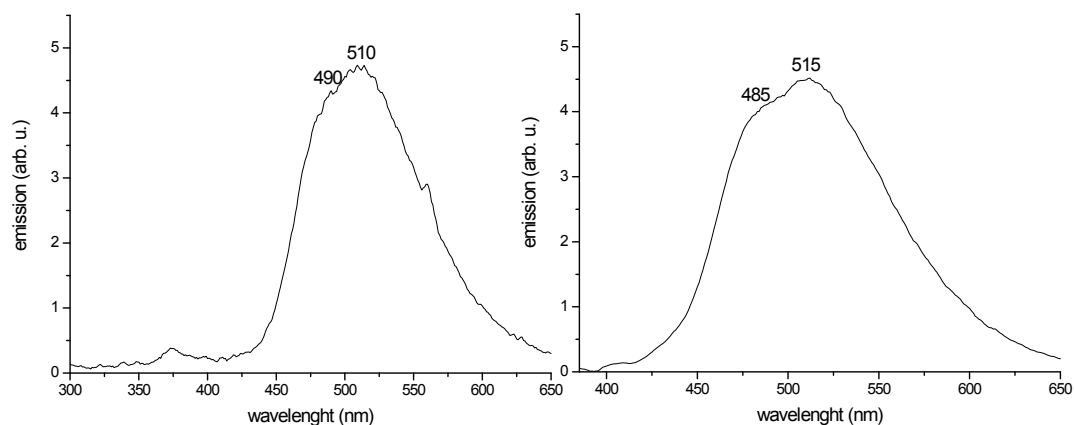

**Fig. S39.** Emission spectra of compound **5** (solvent:  $\text{CHCl}_3\text{:MeOH} = 1\text{:}1$  v/v; concentration:  $1 \cdot 10^{-4}$  M; excitation wavelength: 280 nm (left), 380 nm (right)).

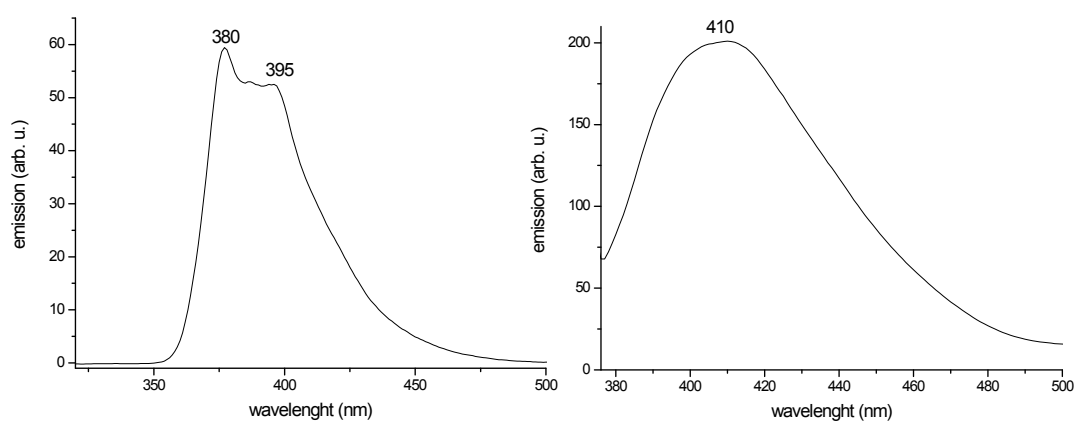

**Fig. S40.** Emission spectrum of compound **8** (solvent:  $\text{CHCl}_3\text{:MeOH} = 1\text{:}1$  v/v; concentration:  $1 \cdot 10^{-4}$  M; excitation wavelength: 280 nm (left), 370 nm (right)).

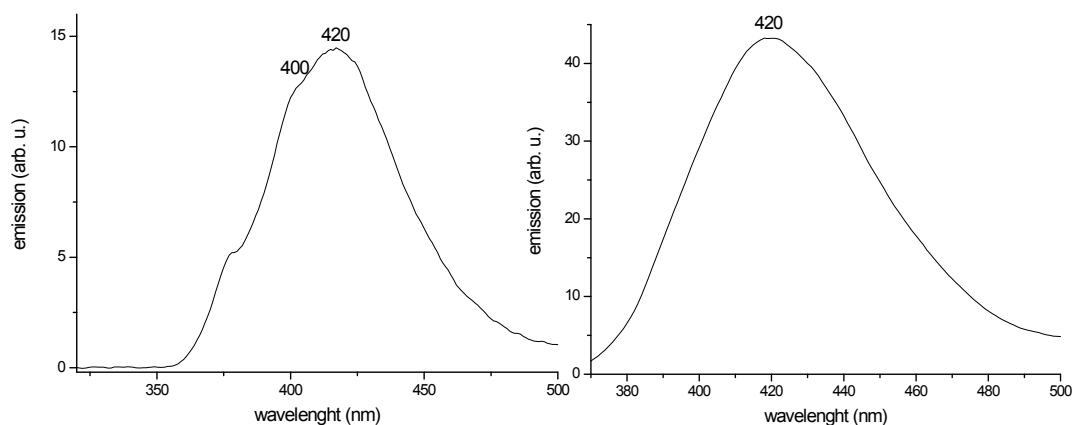

**Fig. S41.** Emission spectra of compound **9** (solvent:  $\text{CHCl}_3$ :MeOH = 1:1 v/v; concentration:  $1 \cdot 10^{-4}$  M; excitation wavelength: 280 nm (left), 380 nm (right)).

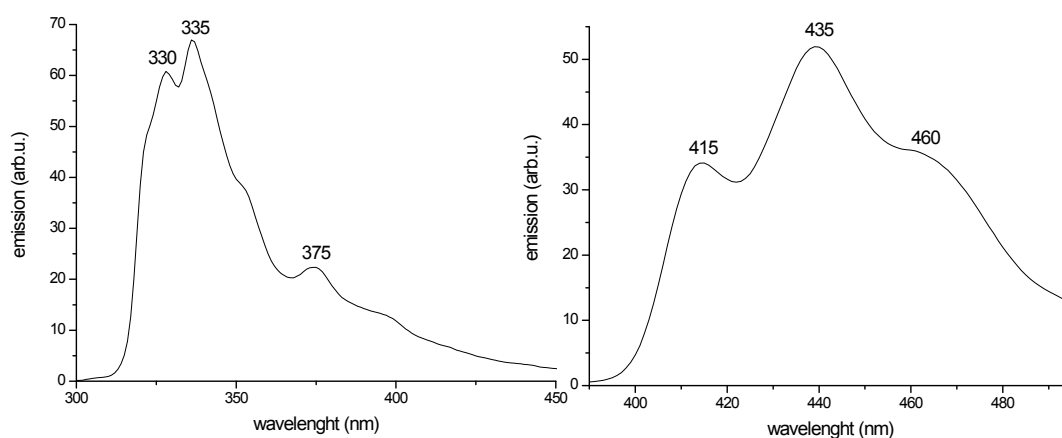

**Fig. S42.** Emission spectra of compound **10** (solvent:  $\text{CHCl}_3$ :MeOH = 1:1 v/v; concentration:  $1 \cdot 10^{-4}$  M; excitation wavelength: 280 nm (left), 380 nm (right)).

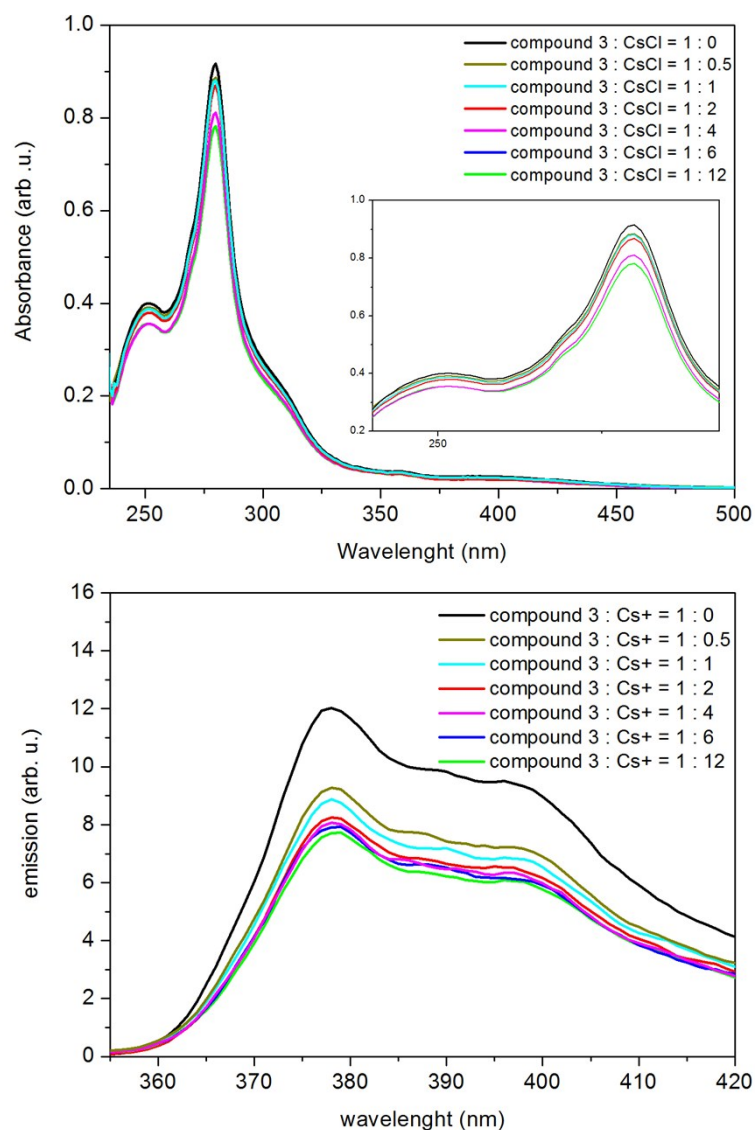

**Fig. S43.** Comparison between UV-Vis (**top**) or fluorescence (**bottom**) spectra titration methods for caesium cation ( $\text{Cs}^+$ ; in the form of  $\text{CsCl}$ ) binding studies with representative compound **3** (solvent:  $\text{CHCl}_3\text{:MeOH} = 1\text{:}1$  v/v; compound **3** concentration:  $1 \cdot 10^{-4}$  M; excitation wavelength for the fluorescence spectra: 280 nm).

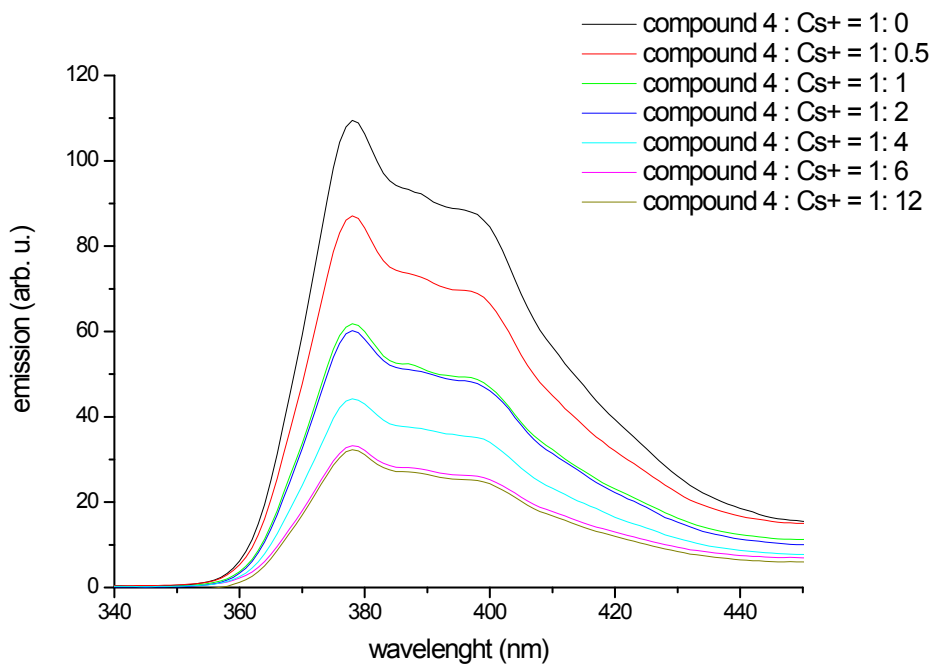

**Fig. S44.** Caesium cation (Cs<sup>+</sup>; in the form of CsCl) binding studies with compound **4** using the fluorescence spectra titration method (solvent: CHCl<sub>3</sub>:MeOH = 1:1 v/v; compound **4** concentration: 1·10<sup>-4</sup> M; excitation wavelength: 280 nm).

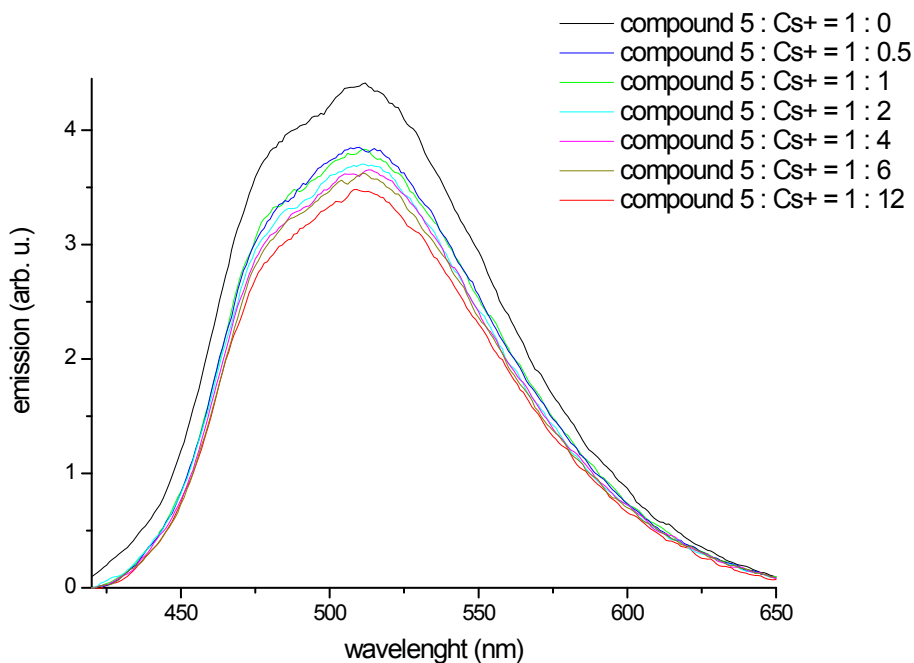

**Fig. S45.** Caesium cation (Cs<sup>+</sup>; in the form of CsCl) binding studies with compound **5** using the fluorescence spectra titration method (solvent: CHCl<sub>3</sub>:MeOH = 1:1 v/v; compound **5** concentration: 1·10<sup>-4</sup> M; excitation wavelength: 280 nm).

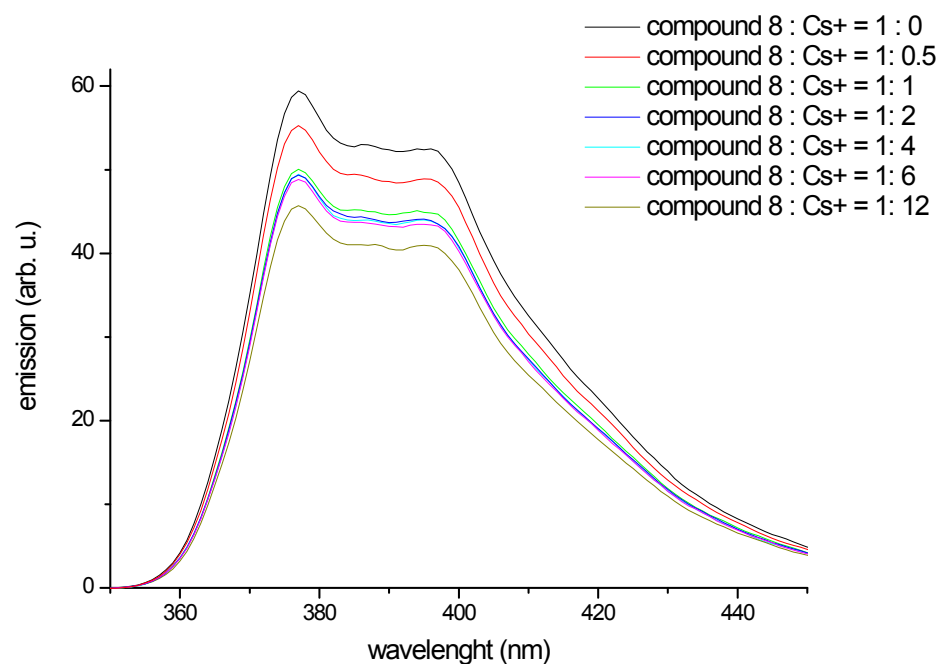

**Fig. S46.** Caesium cation (Cs<sup>+</sup>; in the form of CsCl) binding studies with compound **8** using the fluorescence spectra titration method (solvent: CHCl<sub>3</sub>:MeOH = 1:1 v/v; compound **8** concentration: 1·10<sup>-4</sup> M; excitation wavelength: 280 nm).

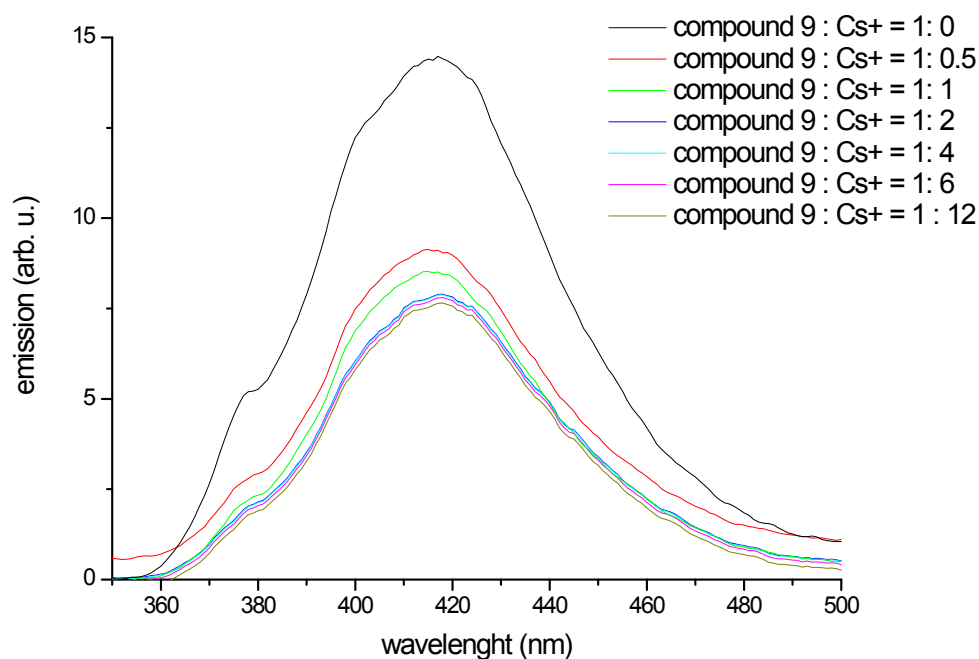

**Fig. S47.** Caesium cation (Cs<sup>+</sup>; in the form of CsCl) binding studies with compound **9** using the fluorescence spectra titration method (solvent: CHCl<sub>3</sub>:MeOH = 1:1 v/v; compound **9** concentration: 1·10<sup>-4</sup> M; excitation wavelength: 280 nm).

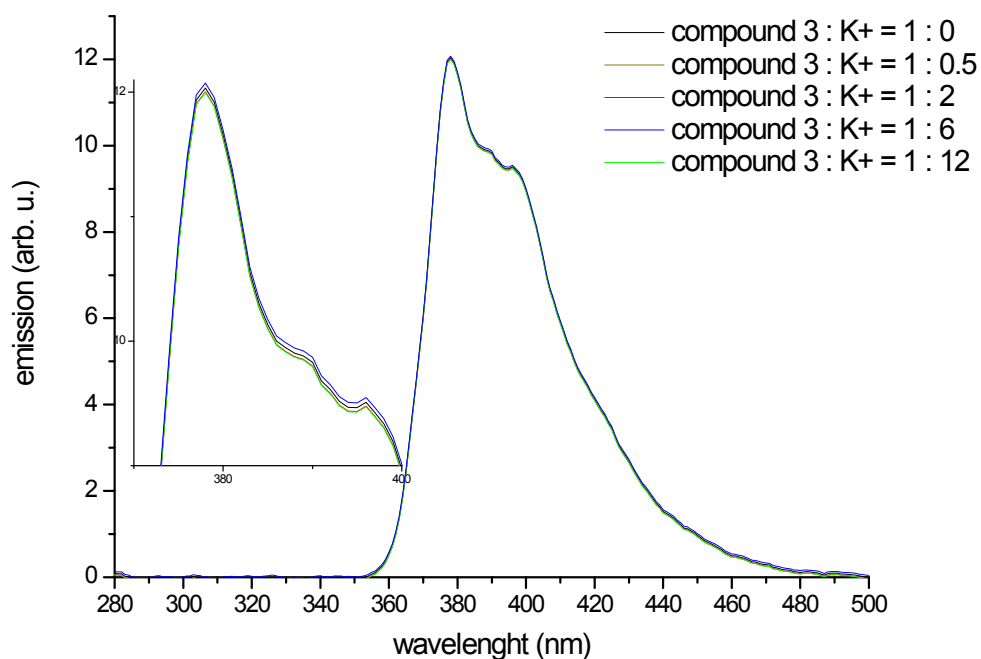

**Fig. S48.** Potassium cation (K<sup>+</sup>; in the form of KCl) binding studies with compound **3** using the fluorescence spectra titration method (solvent: CHCl<sub>3</sub>:MeOH = 1:1 v/v; compound **3** concentration: 1·10<sup>-4</sup> M; excitation wavelength: 280 nm).

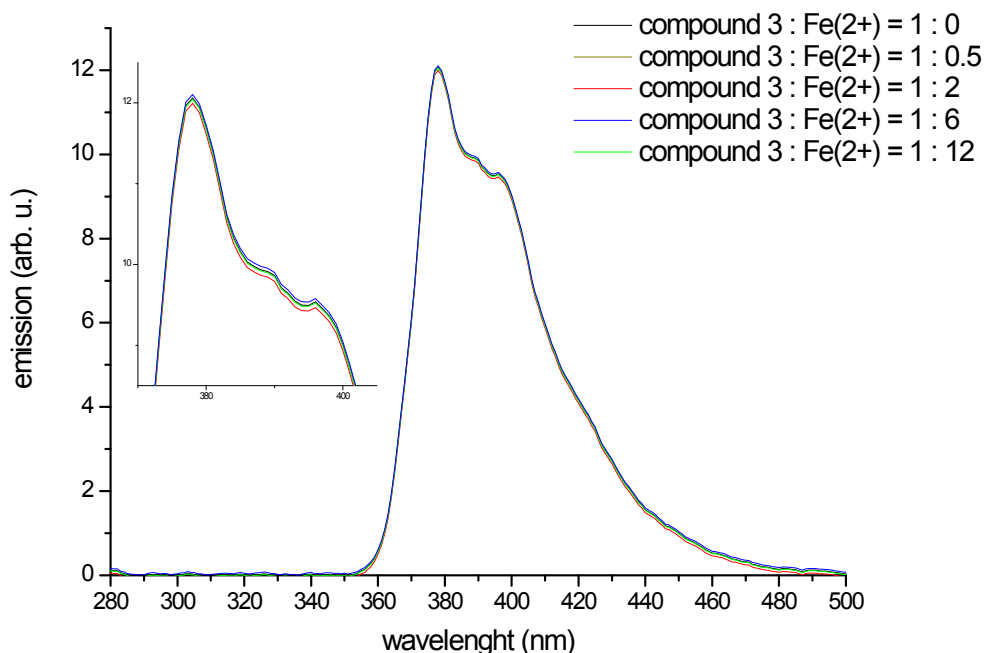

**Fig. S49.** Iron cation (Fe<sup>2+</sup>; in the form of FeCl<sub>2</sub>) binding studies with compound **3** using the fluorescence spectra titration method (solvent: CHCl<sub>3</sub>:MeOH = 1:1 v/v; compound **3** concentration: 1·10<sup>-4</sup> M; excitation wavelength: 280 nm).

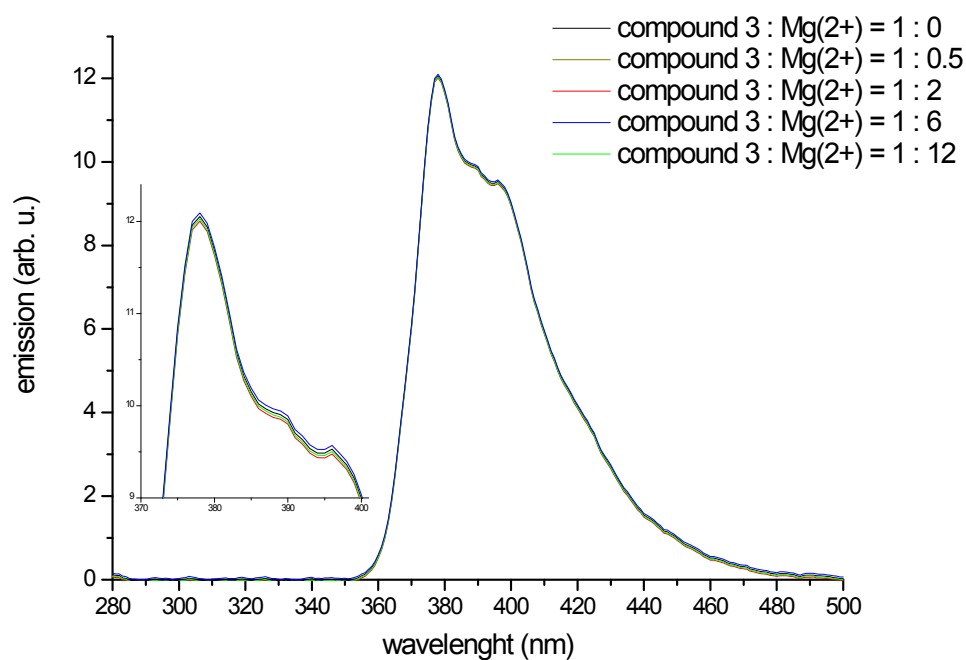

**Fig. S50.** Magnesium cation ( $Mg^{2+}$ ; in the form of  $MgCl_2$ ) binding studies with compound **3** using the fluorescence spectra titration method (solvent:  $CHCl_3$ :MeOH = 1:1 v/v; compound **3** concentration:  $1 \cdot 10^{-4}$  M; excitation wavelength: 280 nm).

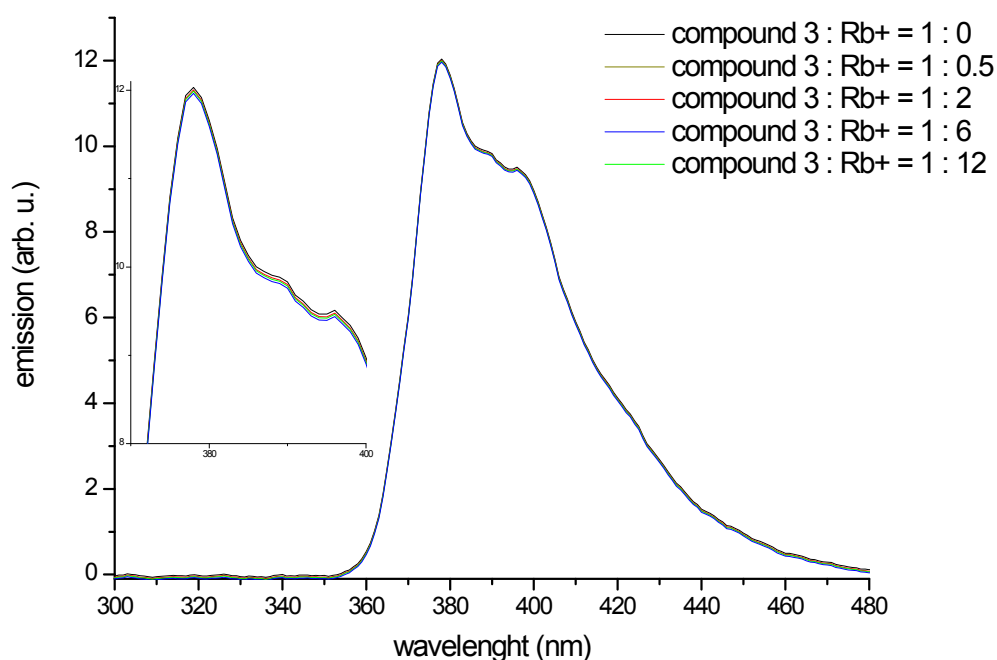

**Fig. S51.** Rubidium cation ( $Rb^{+}$ ; in the form of  $RbCl$ ) binding studies with compound **3** using the fluorescence spectra titration method (solvent:  $CHCl_3$ :MeOH = 1:1 v/v; compound **3** concentration:  $1 \cdot 10^{-4}$  M; excitation wavelength: 280 nm).



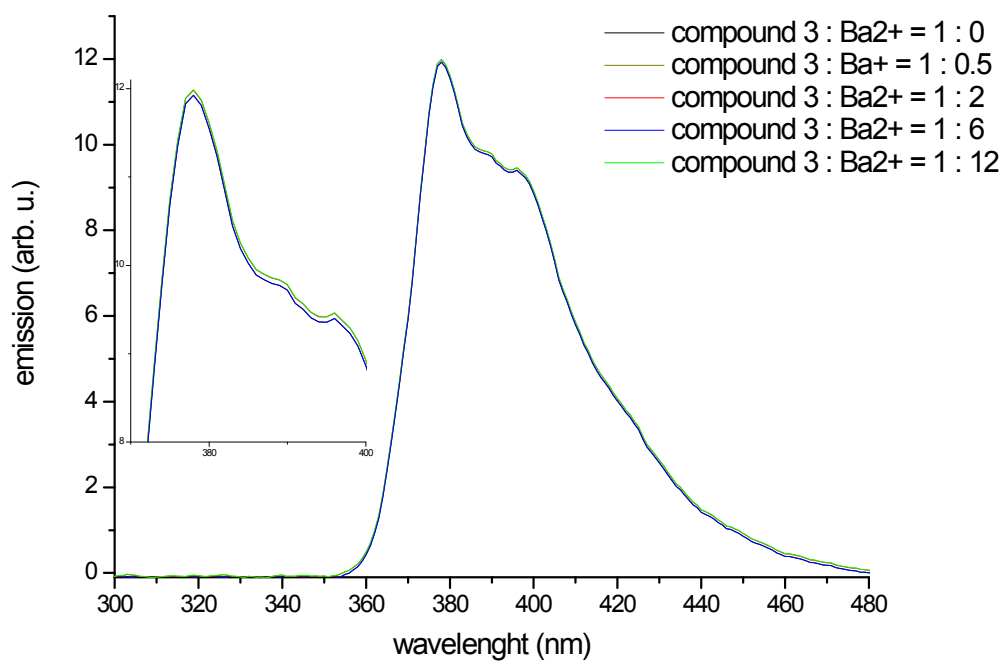

**Fig. S52.** Barium cation ( $\text{Ba}^+$ ; in the form of  $\text{BaCl}_2$ ) binding studies with compound **3** using the fluorescence spectra titration method (solvent:  $\text{CHCl}_3\text{:MeOH} = 1\text{:}1$  v/v; compound **3** concentration:  $1 \cdot 10^{-4}$  M; excitation wavelength: 280 nm).

## S6. The Job's plots

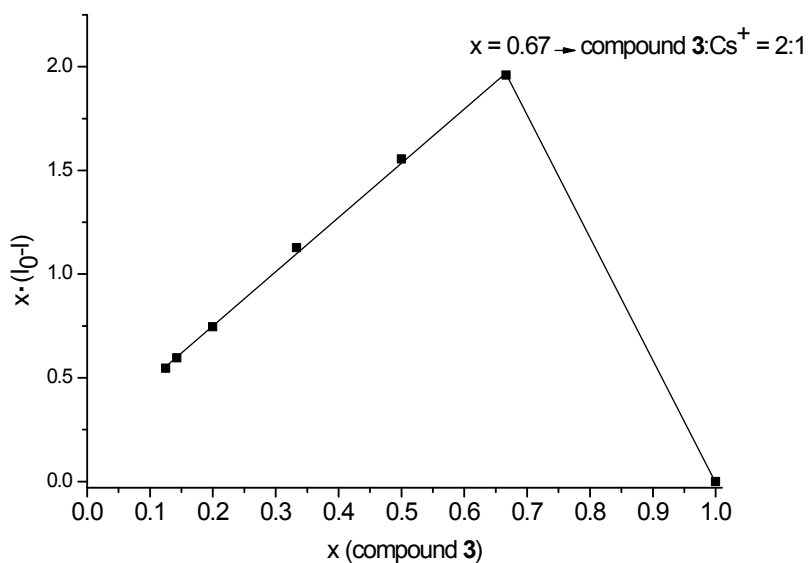

**Fig. S53.** The Job's plot related to the interactions of the compound **3** with  $\text{Cs}^+$  (based on the data from the fluorescence spectra titration;  $x$  stands for the molar fraction of compound **3**,  $I_0$  stands for the emission intensity of compound **3** without  $\text{Cs}^+$  added,  $I$  stands for the emission intensity of compound with the given amount of  $\text{Cs}^+$  added).

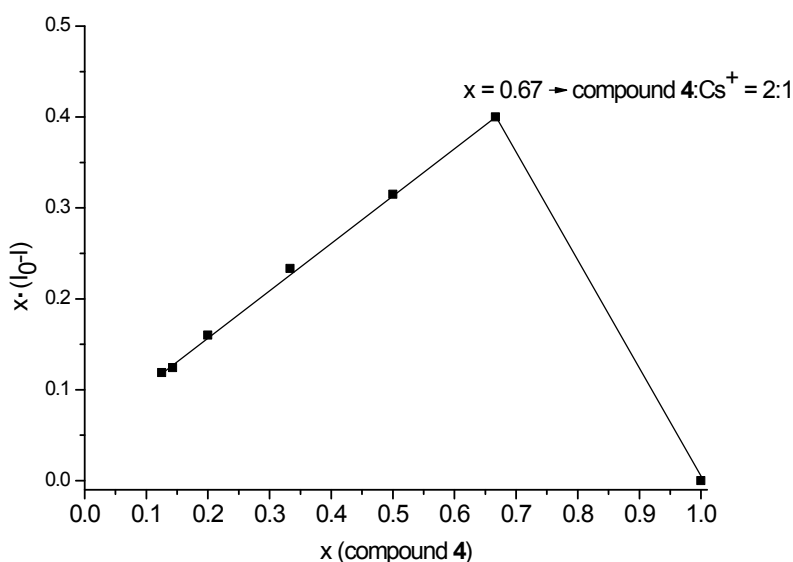

**Fig. S54.** The Job's plot related to the interactions of the compound **4** with  $\text{Cs}^+$  (based on the data from the fluorescence spectra titration;  $x$  stands for the molar fraction of compound **4**,  $I_0$  stands for the emission intensity of compound **4** without  $\text{Cs}^+$  added,  $I$  stands for the emission intensity of compound with the given amount of  $\text{Cs}^+$  added).

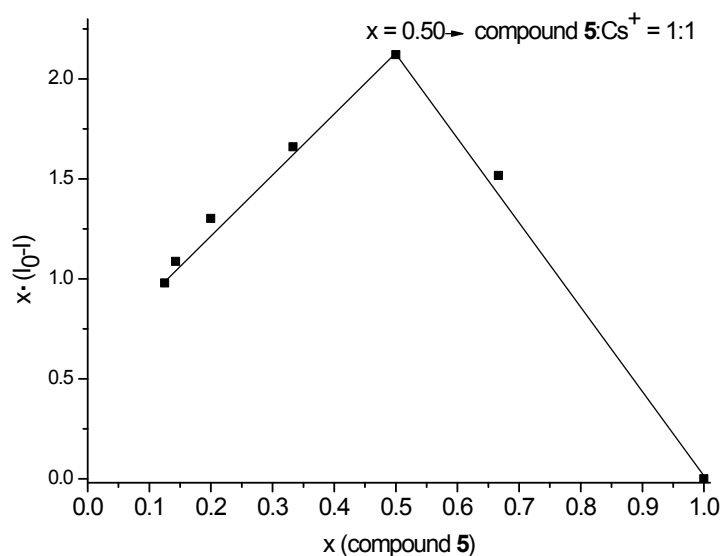

**Fig. S55.** The Job's plot related to the interactions of the compound **5** with Cs<sup>+</sup> (based on the data from the fluorescence spectra titration;  $x$  stands for the molar fraction of compound **5**,  $I_0$  stands for the emission intensity of compound **5** without Cs<sup>+</sup> added,  $I$  stands for the emission intensity of compound with the given amount of Cs<sup>+</sup> added).

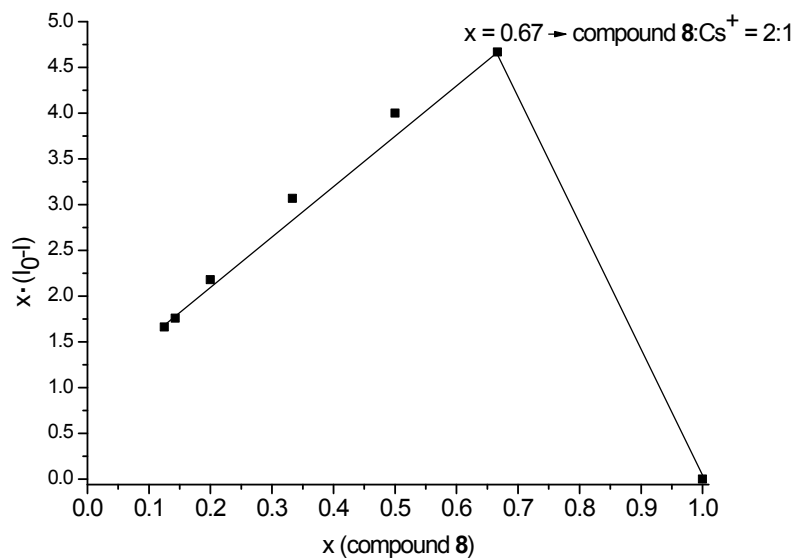

**Fig. S56.** The Job's plot related to the interactions of the compound **8** with Cs<sup>+</sup> (based on the data from the fluorescence spectra titration;  $x$  stands for the molar fraction of compound **8**,  $I_0$  stands for the emission intensity of compound **8** without Cs<sup>+</sup> added,  $I$  stands for the emission intensity of compound with the given amount of Cs<sup>+</sup> added).

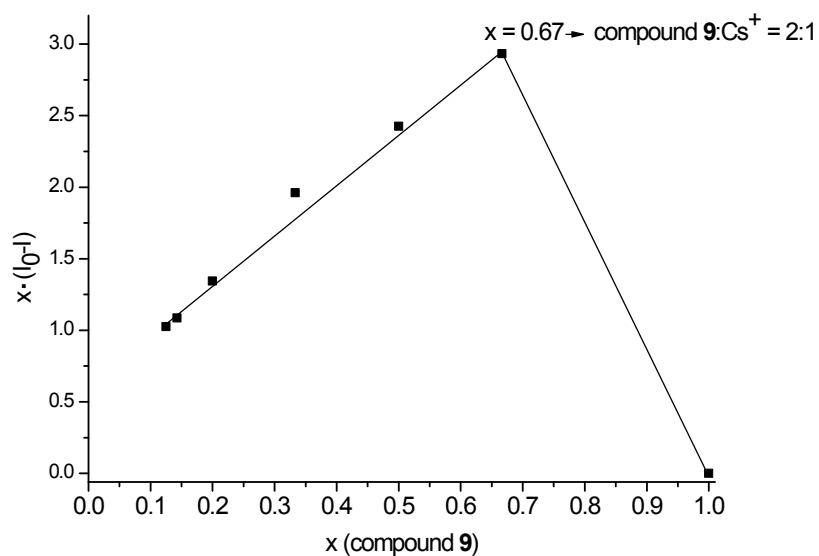

**Fig. S57.** The Job's plot related to the interactions of the compound **9** with  $\text{Cs}^+$  (based on the data from the fluorescence spectra titration;  $x$  stands for the molar fraction of compound **9**,  $I_0$  stands for the emission intensity of compound **9** without  $\text{Cs}^+$  added,  $I$  stands for the emission intensity of compound with the given amount of  $\text{Cs}^+$  added).

## S7. $^1\text{H}$ NMR titration experiments

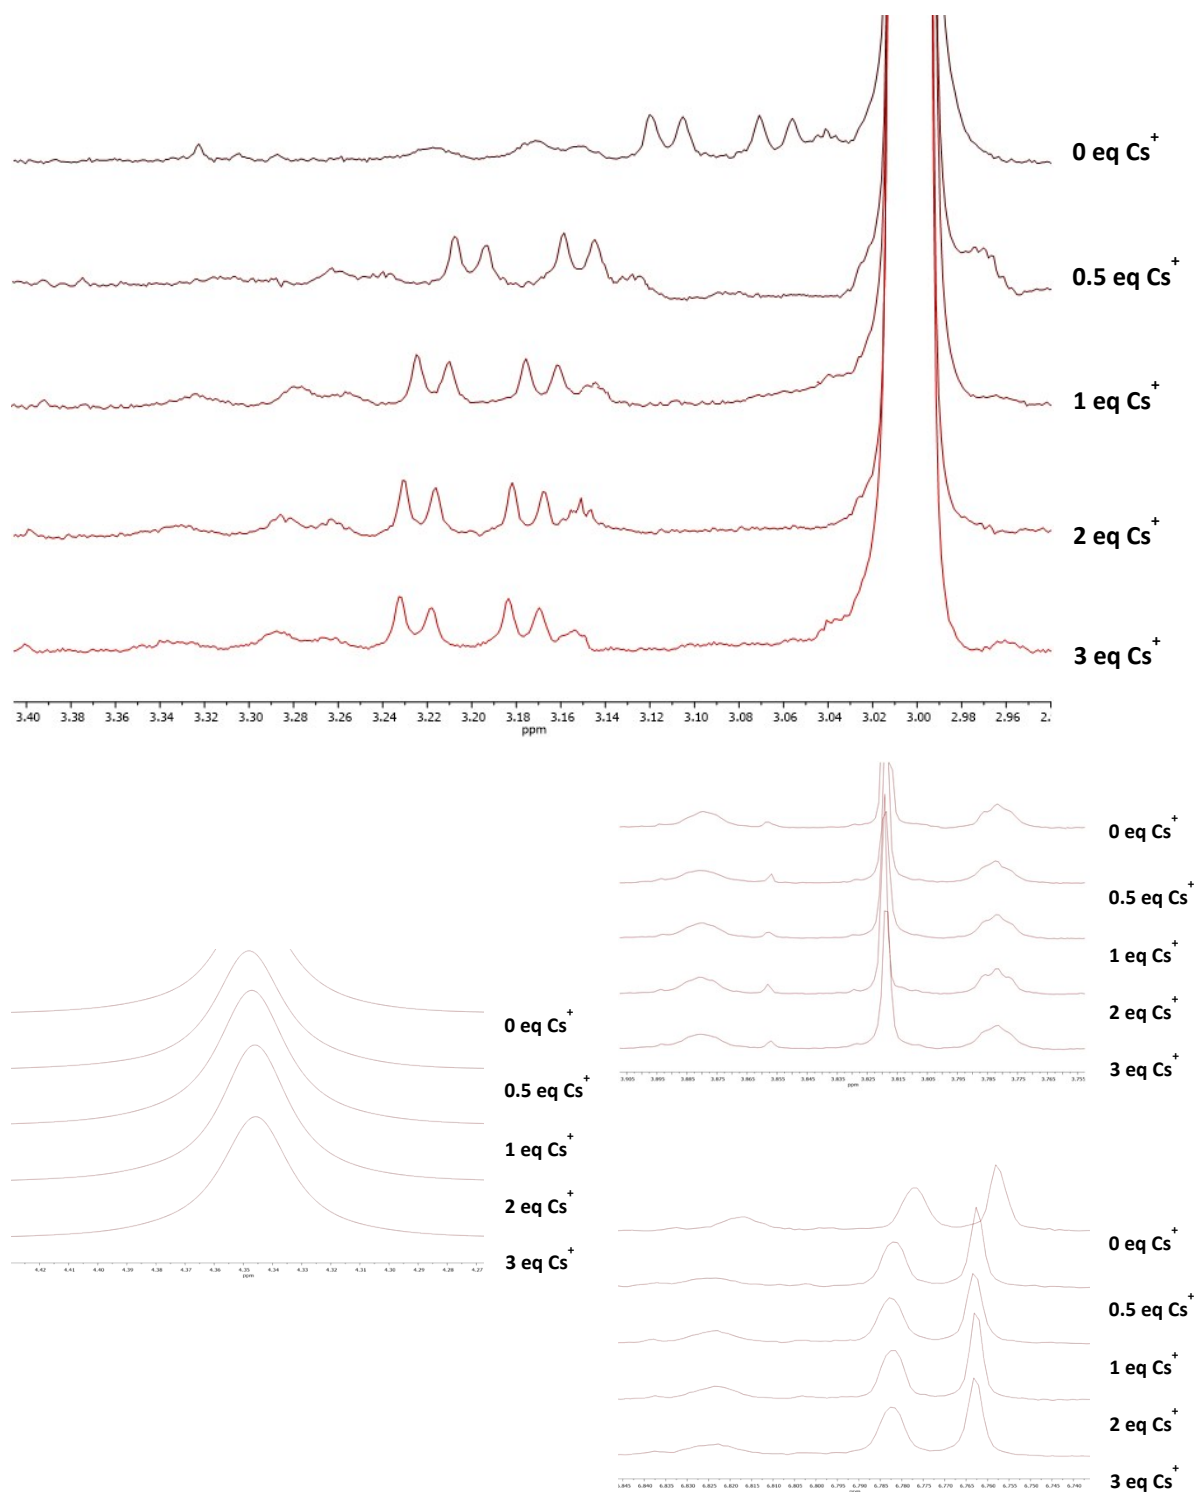

**Fig. S58.** Caesium cation ( $\text{Cs}^+$ ; in the form of  $\text{CsCl}$ ) binding studies with compound **3** using the  $^1\text{H}$  NMR titration method (solvent:  $\text{CDCl}_3:\text{CD}_3\text{OD} = 1:1$  v/v; compound **3** concentration: 1.5 mM). The insets of the spectra are presented.

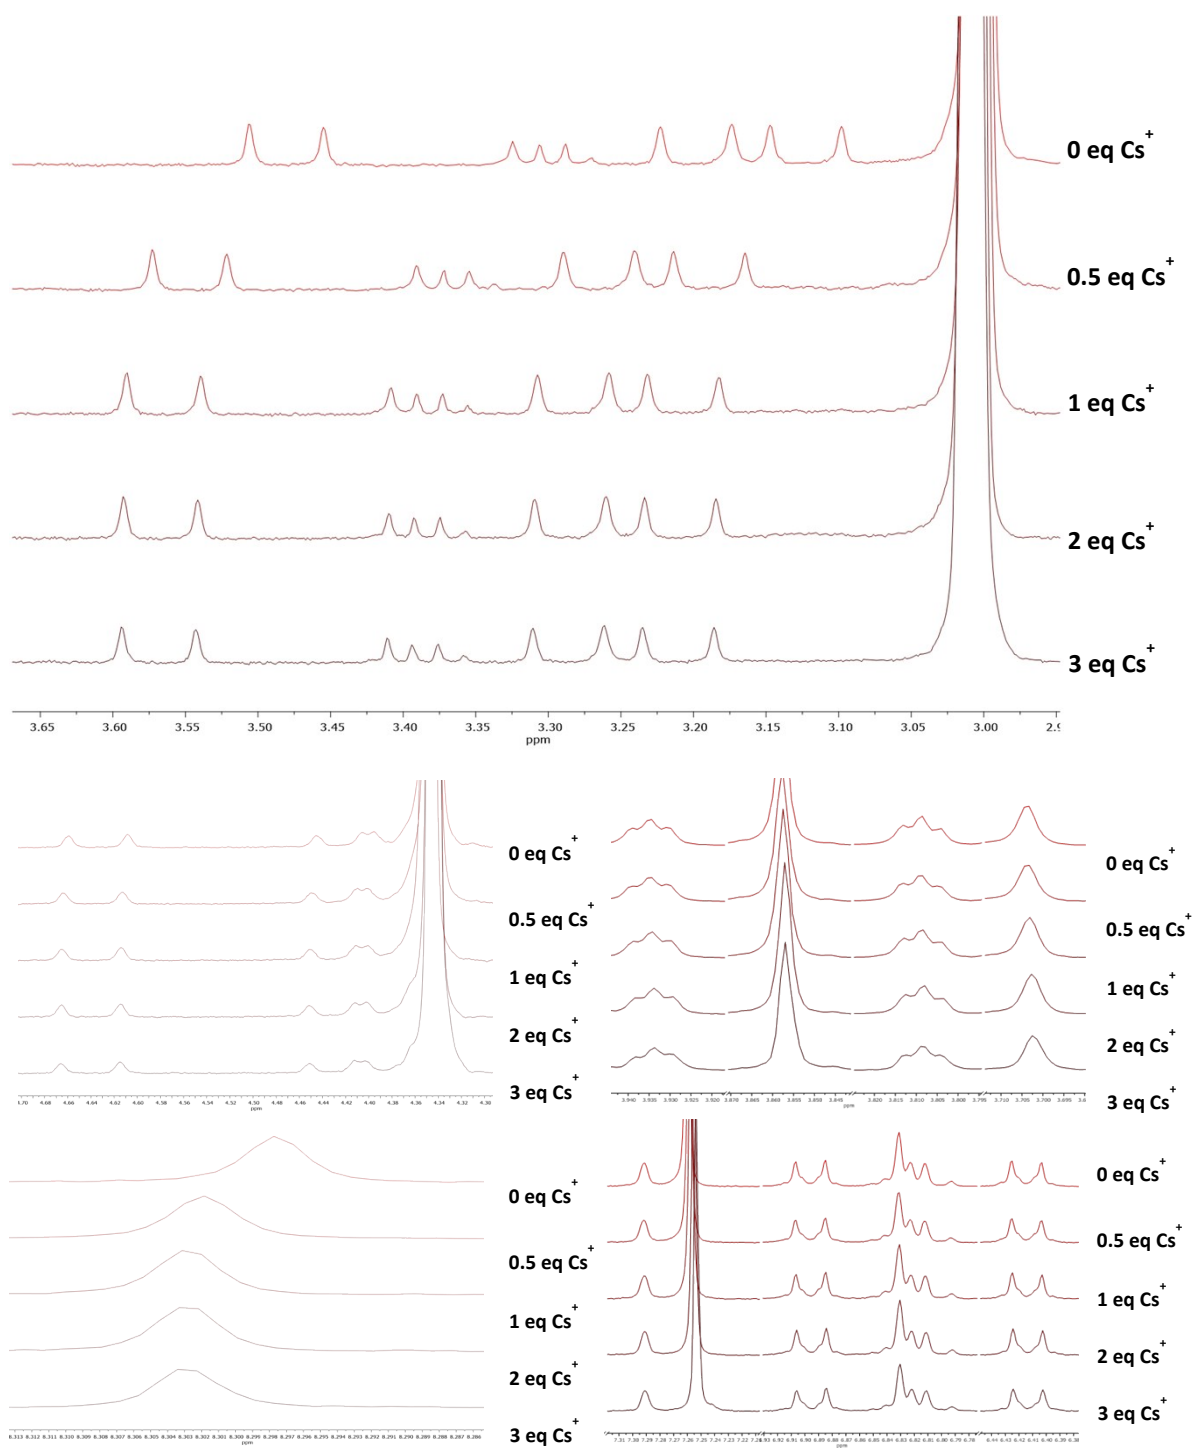

**Fig. S59.** Caesium cation ( $\text{Cs}^+$ ; in the form of  $\text{CsCl}$ ) binding studies with compound **4** using the  $^1\text{H}$  NMR titration method (solvent:  $\text{CDCl}_3:\text{CD}_3\text{OD} = 1:1$  v/v; compound **4** concentration: 1.5 mM). The insets of the spectra are presented.

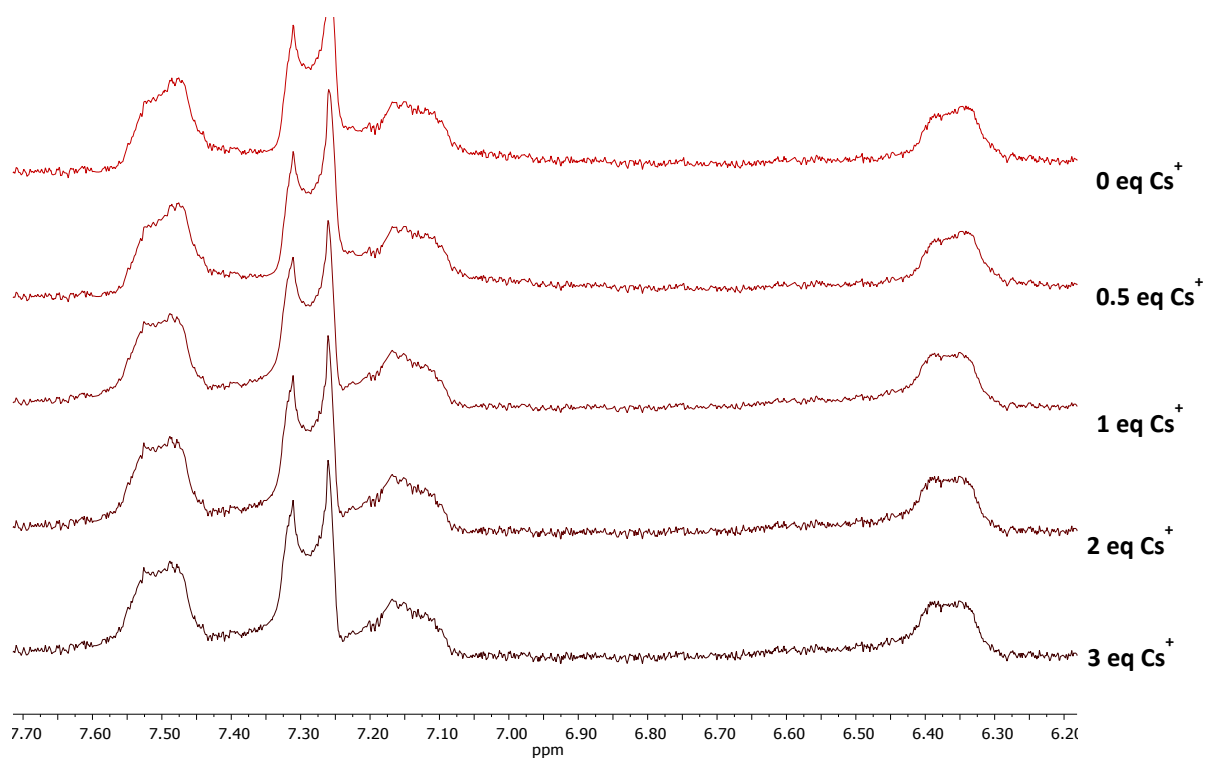

**Fig. S60.** Caesium cation ( $\text{Cs}^+$ ; in the form of  $\text{CsCl}$ ) binding studies with compound **10** using the  $^1\text{H}$  NMR titration method (solvent:  $\text{CDCl}_3:\text{CD}_3\text{OD} = 1:1$  v/v; compound **10** concentration: 1.5 mM).

## S8. Cyclic voltammograms

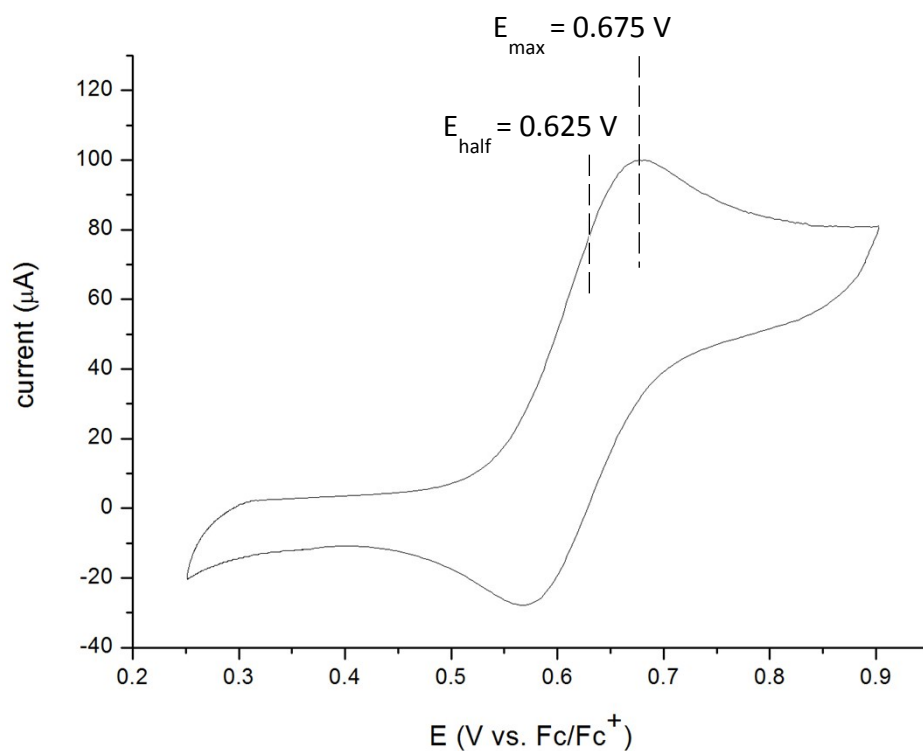

**Fig. S61.** Cyclic voltammogram of compound **3** in CH<sub>2</sub>Cl<sub>2</sub>.

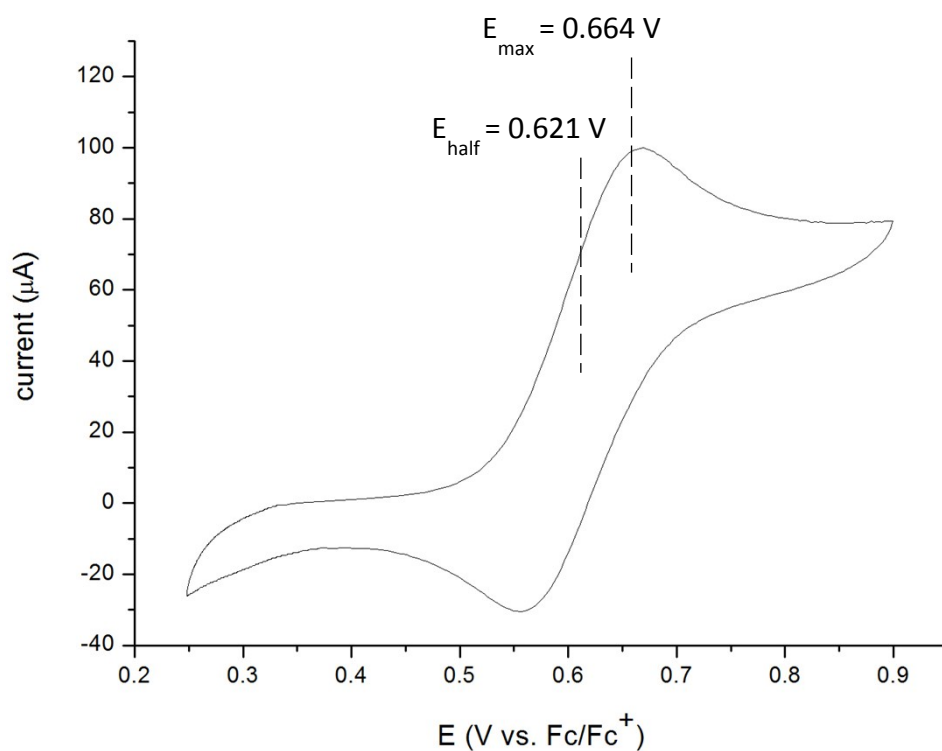

**Fig. S62.** Cyclic voltammogram of compound **4** in CH<sub>2</sub>Cl<sub>2</sub>.



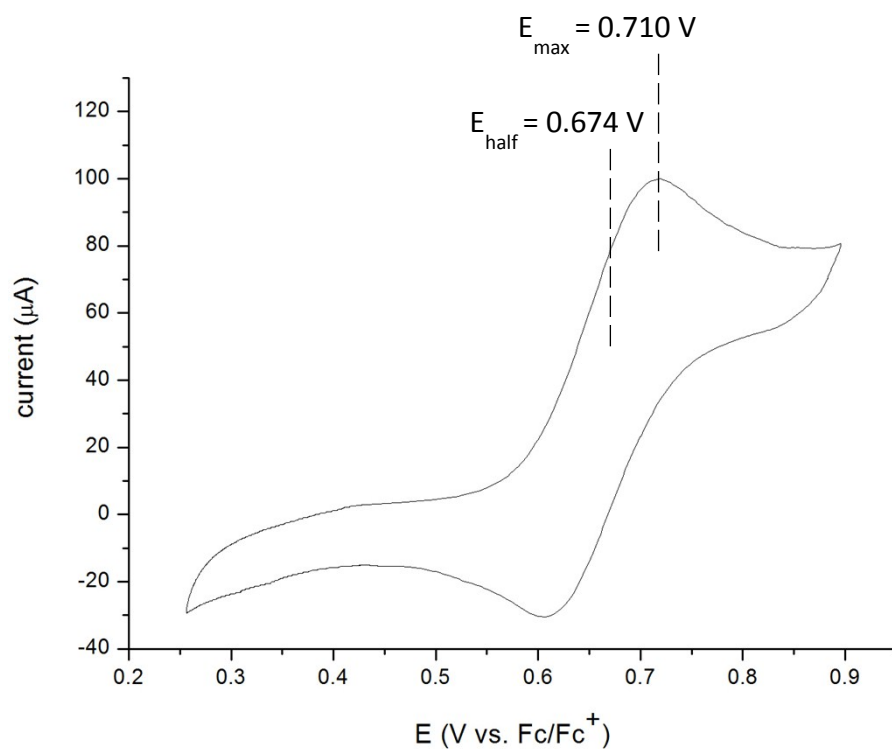

**Fig. S63.** Cyclic voltammogram of compound **5** in  $\text{CH}_2\text{Cl}_2$ .

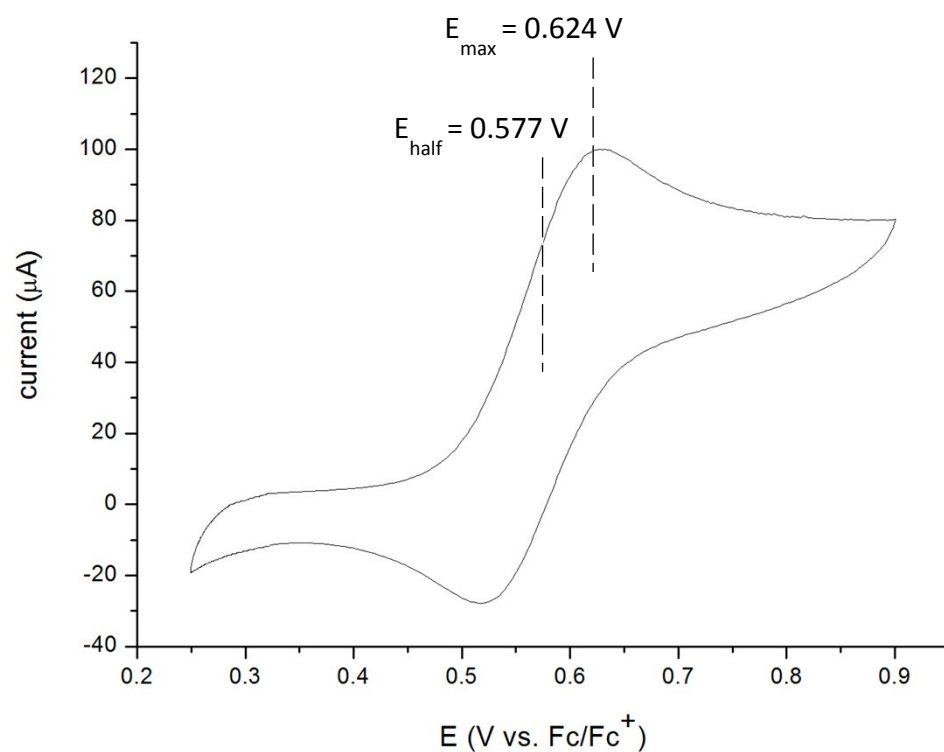

**Fig. S64.** Cyclic voltammogram of compound **8** in  $\text{CH}_2\text{Cl}_2$ .

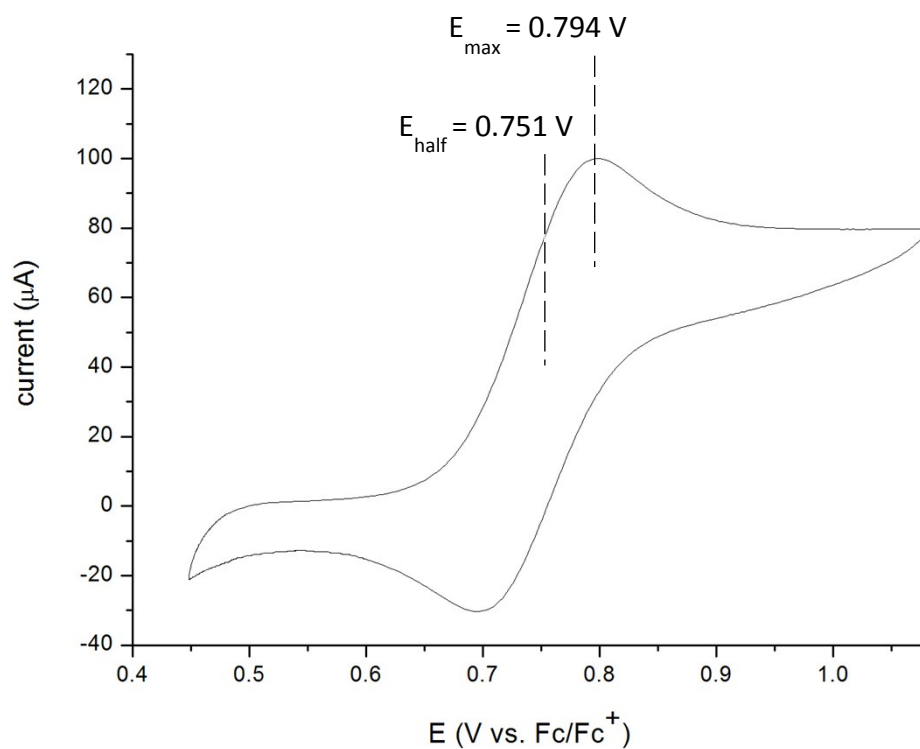

**Fig. S65.** Cyclic voltammogram of compound **9** in  $\text{CH}_2\text{Cl}_2$ .

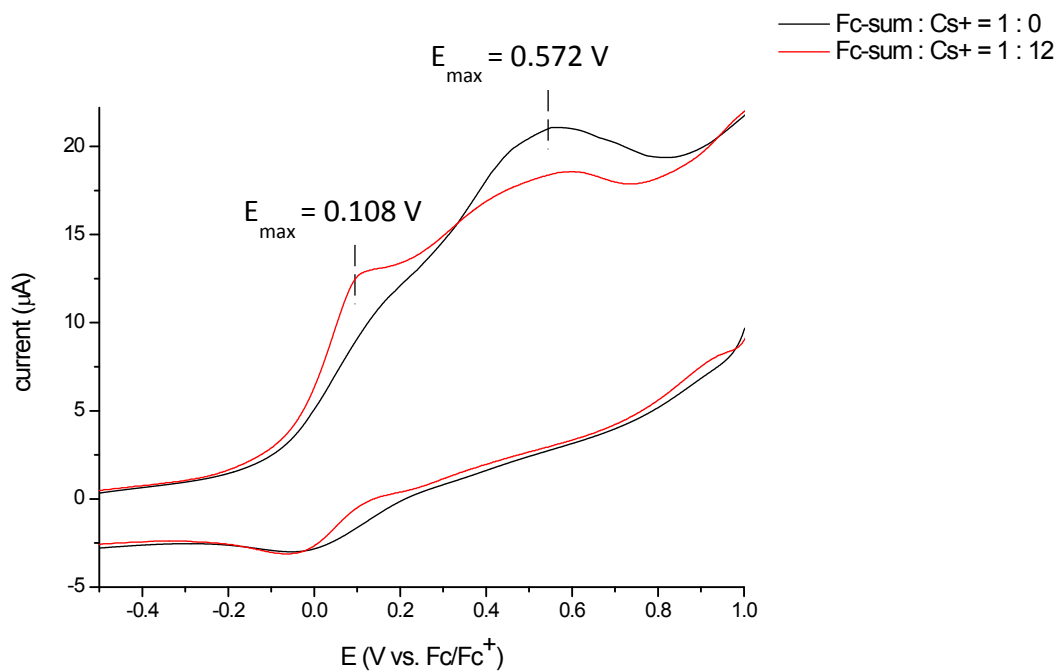

**Fig. S66.** Cyclic voltammogram of compound **3** in  $\text{CHCl}_3:\text{MeOH} = 1:1$  v/v, with (black curve) and without (red curve)  $\text{Cs}^+$  added (12 eq).

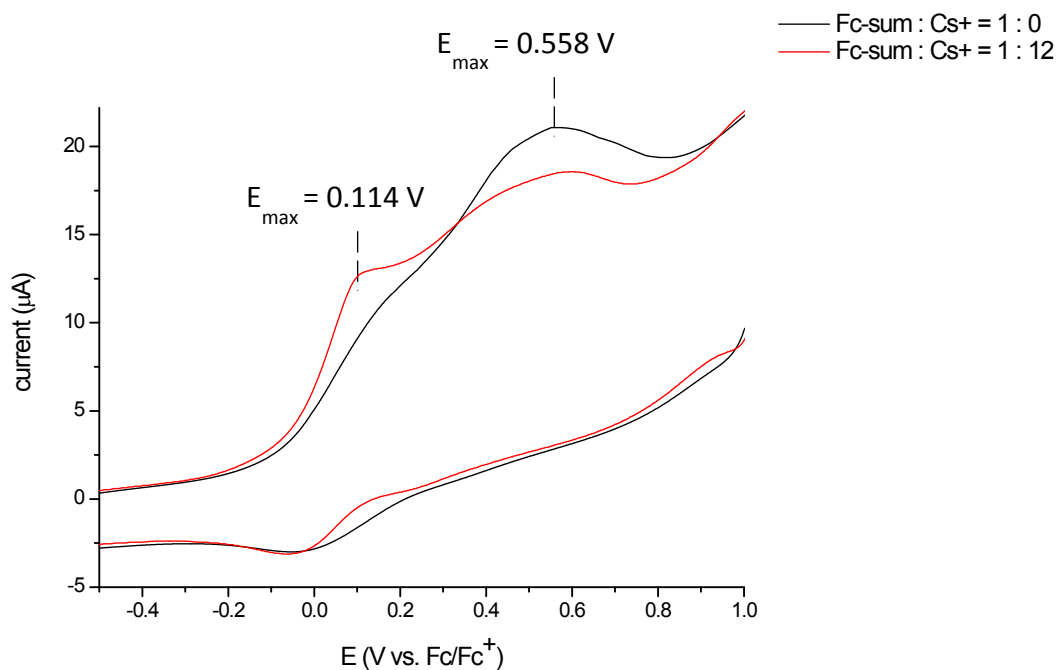

**Fig. S67.** Cyclic voltammogram of compound **4** in  $\text{CHCl}_3:\text{MeOH} = 1:1$  v/v, with (black curve) and without (red curve)  $\text{Cs}^+$  added (12 eq).

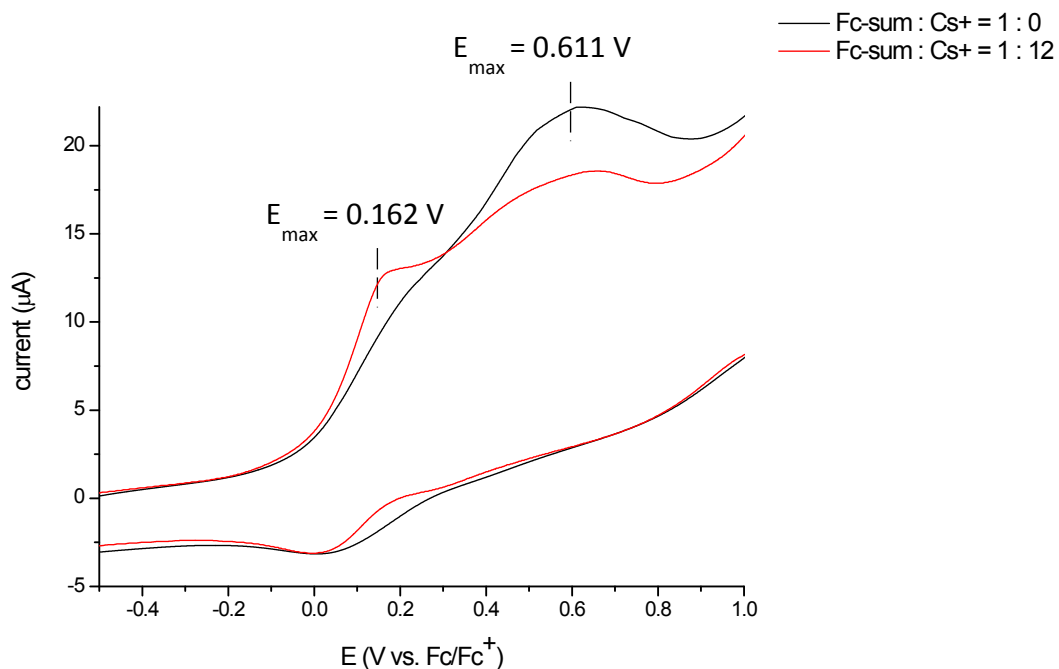

**Fig. S68.** Cyclic voltammogram of compound **5** in  $\text{CHCl}_3:\text{MeOH} = 1:1$  v/v, with (black curve) and without (red curve)  $\text{Cs}^+$  added (12 eq).

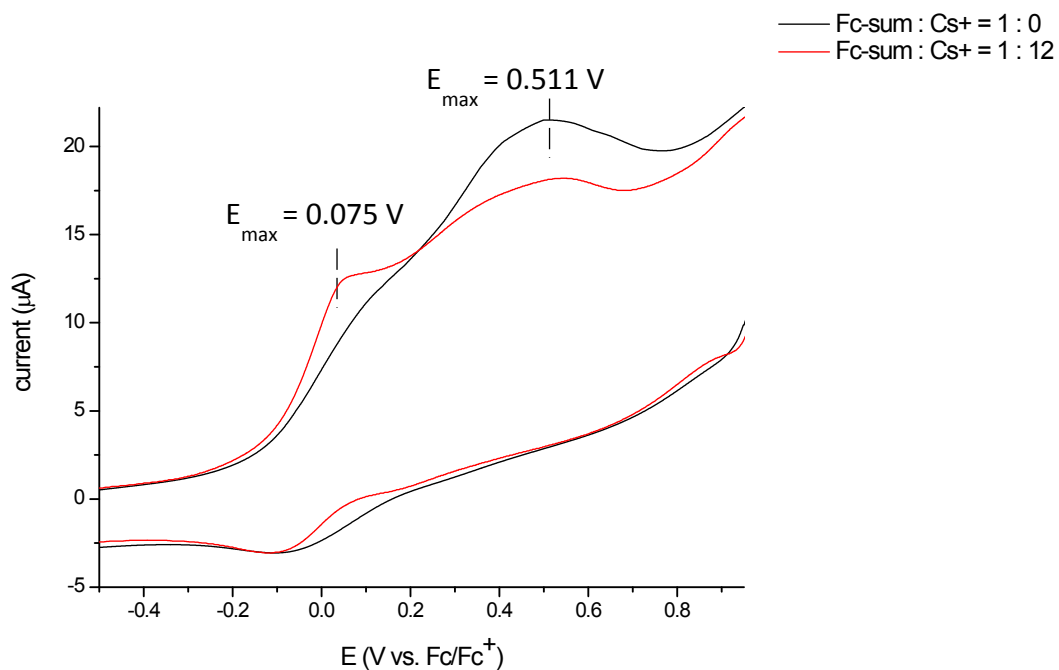

**Fig. S69.** Cyclic voltammogram of compound **8** in  $\text{CHCl}_3:\text{MeOH} = 1:1$  v/v, with (black curve) and without (red curve)  $\text{Cs}^+$  added (12 eq).

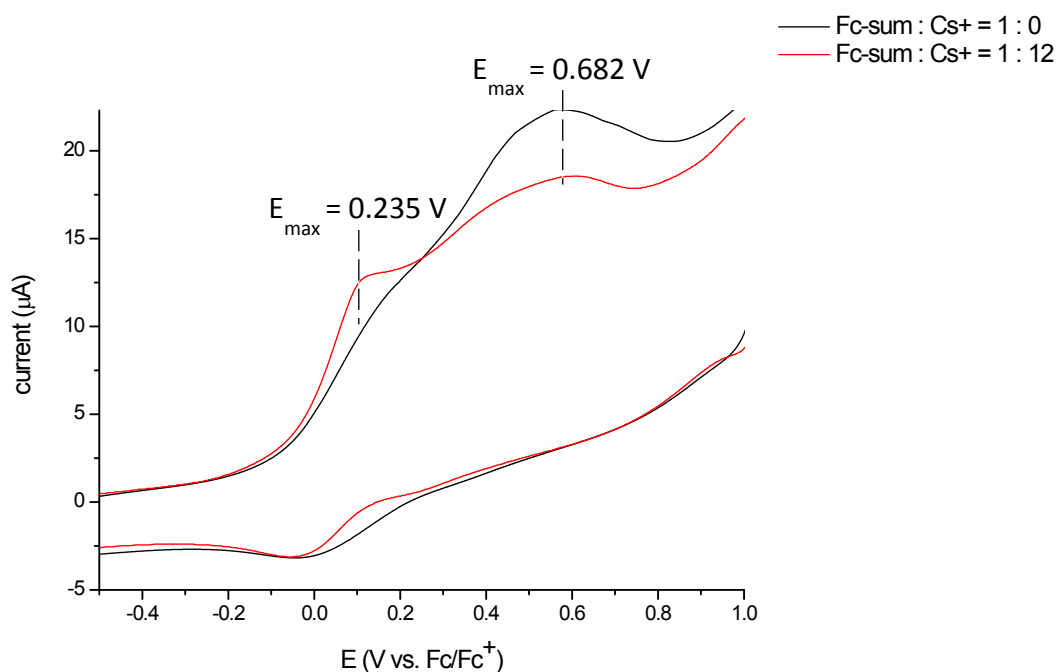

**Fig. S70.** Cyclic voltammogram of compound **9** in  $\text{CHCl}_3:\text{MeOH} = 1:1$  v/v, with (black curve) and without (red curve)  $\text{Cs}^+$  added (12 eq).

## S9. Details on calculation of $K_a$ and LOD

Calculations were based on the Stern-Volmer equation:

$$\frac{I_0}{I} = 1 + K_a \cdot C_{cation}$$

, where  $C_{cation}$  is the molar concentration of the cation,  $I_0$  and  $I$  are the fluorescence intensity of Fc-sumanene derivative in the absence and in the presence of cation, respectively (reference no. 26 in the manuscript).  $K_a$  and LOD were calculated as follows:

- $K_a$  value for compound **5** was calculated accordingly on the basis of the  $I_0/I = f(C_{cation})$  linear dependency (Fig. S71).  $K_a$  values for compounds **3**, **4**, **8**, **9** were calculated accordingly on the basis of the  $I_0/I = f(C_{cation}^2)$  linear dependences (Fig. S72).  $I_0/I = f(C_{cation})$  linear plots for compounds **3**, **4**, **8**, **9** are also presented in Fig. S71. Despite the fact that the Stern-Volmer method fits best for 1:1 interaction model, both  $I_0/I = f(C_{cation})$  and  $I_0/I = f(C_{cation}^2)$  plots for compounds **3**, **4**, **8** were linear, thus enabling calculation of  $K_a$ . However, the calculated  $K_a$  numbers for compounds **3**, **4**, **8**, **9** should be treated as the approximate ones.
- LOD values were calculated accordingly on the basis of the  $I_0 - I/I_0 = f(C_{cation})$  linear dependences (Fig. S73).

The plots are given below. The results of calculations are summarized in **Table 2** in the main article file.

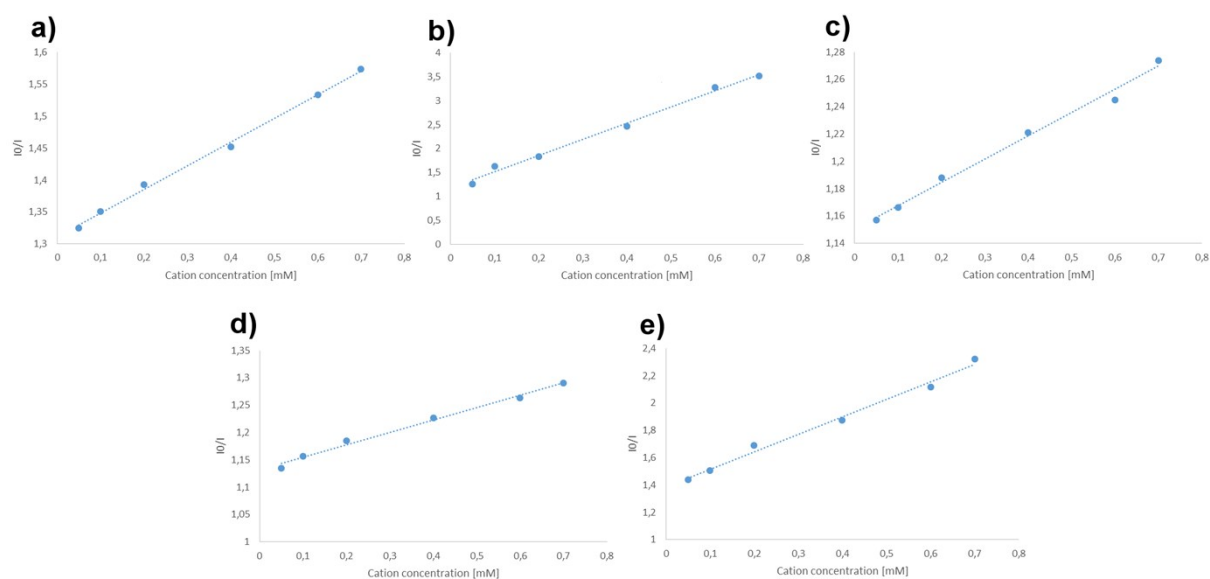

**Fig. S71.**  $I_0/I = f(C_{cation})$  plot for: (a) compound 3, (b) compound 4, (c) compound (5), (d) compound (8), (e) compound 9.

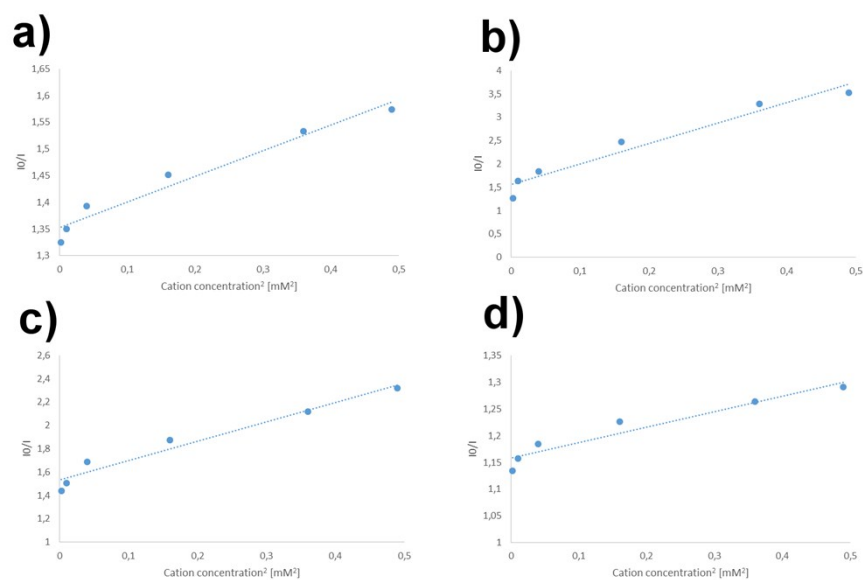

**Fig. S72.**  $I_0/I = f(C_{cation}^2)$  plot for: (a) compound 3, (b) compound 4, (c) compound (8), (d) compound 9.

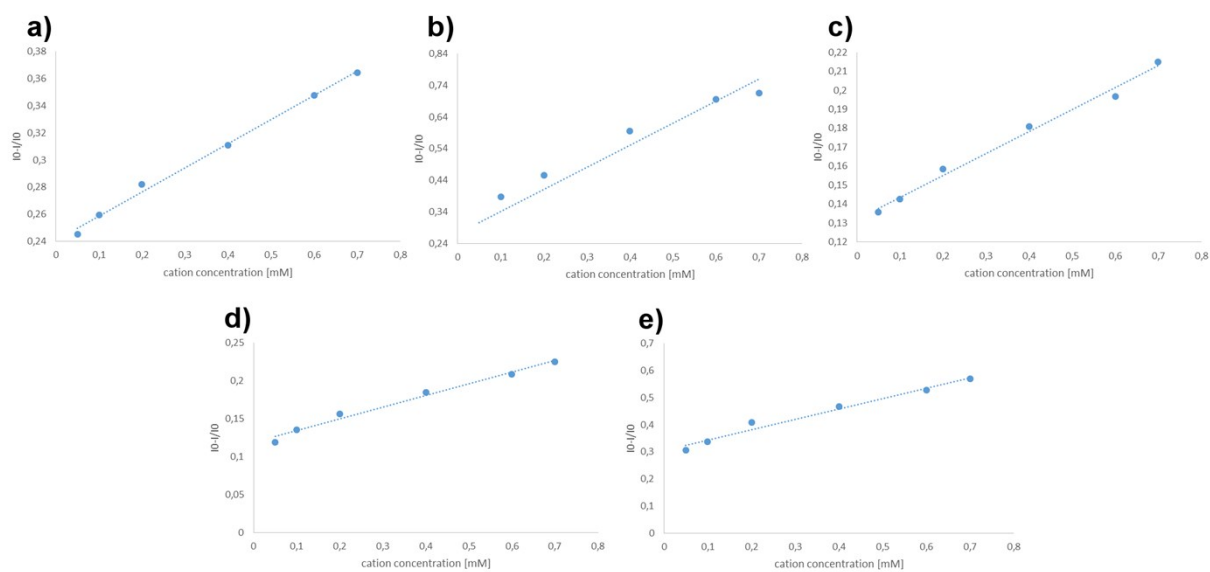

**Fig. S73.**  $I_0 - I/I = f(C_{cation})$  plot for: (a) compound **3**, (b) compound **4**, (c) compound (**5**), (d) compound (**8**), (e) compound **9**.

## S10. References

- [1] H. Sakurai, T. Daiko, T. Hirao. *Science*, **2003**, 301, 1878.
- [2] B. B. Shrestha, S. Karanjit, G. Panda, S. Higashibayashi, H. Sakurai. *Chem. Lett.*, **2013**, 42, 386-388.
- [3] P. Chen, C. Liu, J. Hu, H. Zhang, R. Sun. *J. Organomet. Chem.*, **2018**, 854, 113-121.
- [4] N. Dwadnia, F. Allouch, N. Pirio, J. Roger, H. Cattey, S. Fournier, M.-J. Penouilh, C. H. Devillers, D. Lucas, D. Naoufal, R. B. Salem, J.-C. Hierso. *Organometallics*, **2013**, 32, 5784–5797.
- [5] R. Arancibia, A. H. Klahn, G. E. Buono-Core, E. Gutierrez-Puebla, A. Monge, M. E. Medina, C. Olea-Azar, J. D. Maya, F. Godoy. *J. Organomet. Chem.*, **2011**, 696, 3238-3244.
- [6] MeOH was dried over molecular sieves 3Å and bubbled with N<sub>2</sub> before the reaction.
- [7] The compound **5** can be also isolated by means of filtration (67% yield). After filtration of the reaction mixture, the crude product is washed with cold (-30°C) methanol (5 mL), cold (-30°C) THF (1.5 mL) and dried under vacuum.
- [8] The solvent was bubbled with N<sub>2</sub> before the reaction.
- [9] The compound **8** and be also purified with PTLC (SiO<sub>2</sub>; CH<sub>2</sub>Cl<sub>2</sub>/MeOH = 95:5 v/v; R<sub>f</sub> (**8**) = 0.9; 63% yield).
- [10] The optimized partial structure of compound **3** was obtained with Gaussian09 software (M. J. Frisch, et al. *Gaussian 09, Revision B.01*, Gaussian Inc., Wallingford, CT, **2010**).
